# Supplementary material for: Transcriptional response to petiole heat girdling in cassava
Source: PubMed Central journal article supplement (PMC4325323; doi:10.1038/srep08414), 2015-02-12
Supplement: srep08414-s1.pdf [file srep08414-s1.pdf]

## **Supplemental Information**

**Title: Transcriptional response to petiole heat girdling in cassava**

### **Authors:**

#### **Yang Zhang**

The Institute of Tropical Bioscience and Biotechnology (ITBB)  
Chinese Academy of Tropical Agricultural Sciences (CATAS)  
Haikou, Hainan 571101, China

#### **Zehong Ding (Co-first Author)**

The Institute of Tropical Bioscience and Biotechnology (ITBB)  
Chinese Academy of Tropical Agricultural Sciences (CATAS)  
Haikou, Hainan 571101, China

#### **Fangfang Ma**

Donald Danforth Plant Science Center  
975 North Warson Road, St. Louis, Missouri 63132

#### **Raj Deepika Chauhan**

Donald Danforth Plant Science Center  
975 North Warson Road, St. Louis, Missouri 63132

#### **Doug K. Allen**

USDA-ARS/Donald Danforth Plant Science Center  
975 North Warson Road, St. Louis, Missouri 63132  
St. Louis, Missouri 63132, USA

#### **Thomas P. Brutnell**

Donald Danforth Plant Science Center  
975 North Warson Road, St. Louis, Missouri 63132

#### **Wenquan Wang**

The Institute of Tropical Bioscience and Biotechnology (ITBB)  
Chinese Academy of Tropical Agricultural Sciences (CATAS)  
Haikou, Hainan 571101, China

#### **Ming Peng**

The Institute of Tropical Bioscience and Biotechnology (ITBB)  
Chinese Academy of Tropical Agricultural Sciences (CATAS)  
Haikou, Hainan 571101, China

**Pinghua Li (Corresponding Author)**

The Institute of Tropical Bioscience and Biotechnology (ITBB)

Chinese Academy of Tropical Agricultural Sciences (CATAS)

Haikou, Hainan 571101, China

Shandong Agricultural University

Tai'an, Shandong 271018, China

Email: [Pinghuali@sdau.edu.cn](mailto:Pinghuali@sdau.edu.cn)

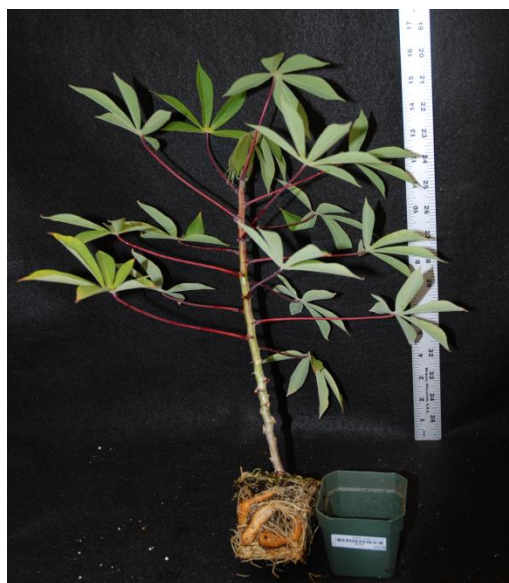

**Supplemental Figure 1| Cassava plant with developing storage root in pot.**

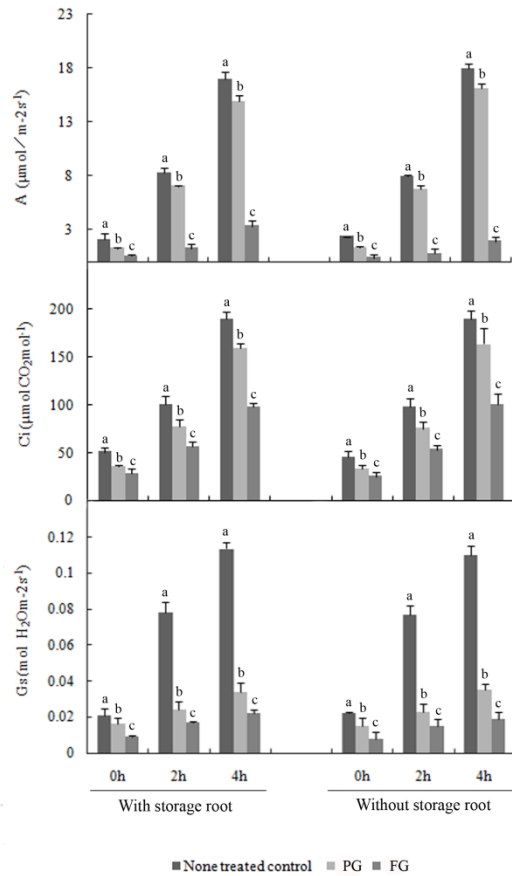

**Supplemental Figure 2| Photosynthetic parameters of control, PG and FG Leaves of cassava plants. Measurements were made at an average ambient relative humidity of  $46.6 \pm 3.4\%$  and an irradiance of  $2000 \mu\text{mol m}^{-2} \text{s}^{-1}$ . A: net photosynthesis rates (Pn); Gs: stomata conductance, Ci: intercellular  $\text{CO}_2$  concentration.**

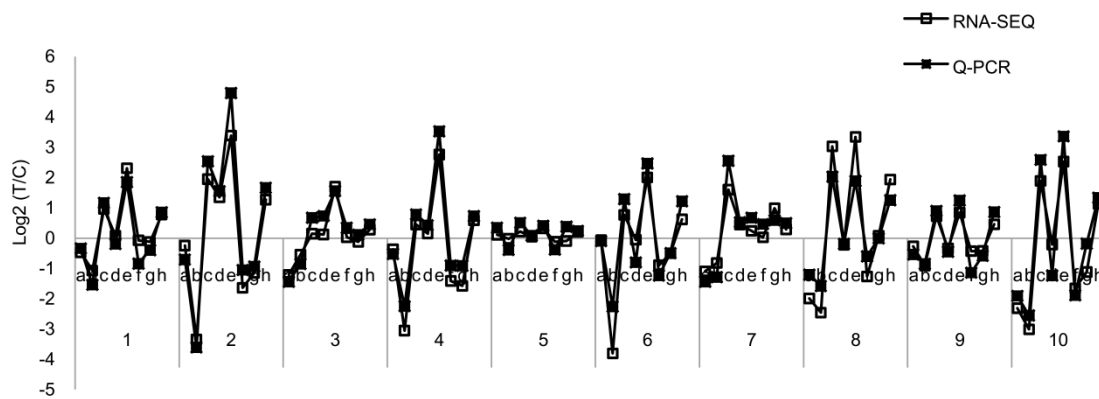

**Supplemental Figure 3| Verification of microarray results by real-time quantitative RT-PCR. Log<sub>2</sub> (treat/control) values for genes (a–k) in the six experimental conditions. Genes: (a) cassava4.1\_017330m.g ; (b) cassava4.1\_008668m.g; (c) cassava4.1\_001840m.g ; (d) cassava4.1\_000732m.g ; (e) cassava4.1\_005409m.g; (f) cassava4.1\_002278m.g ; (g) cassava4.1\_004345m.g ; (h) cassava4.1\_006138m.g . Experimental conditions (1) 0-h PG leaves, (2) 0-h FG leaves, (3) 2-h PG leaves, (4) 2-h FG leaves, (5) 4-h PG leaves, (6) 4-h FG leaves; conditions 7–10 (left to right) lack storage roots: (7) 0-h PG leaves, (8) 0-h FG leaves, (9) 2-h PG leaves, (10) 2-h FG leaves. Primers are listed in Supplemental Table S1.**

**Supplemental Table S1. Glucose and fructose measurements for control, PG and FG leaves. All leaves were harvested and processed concurrently**

|        |    | Glucose (mg/g FW) |           |           | Fructose (mg/g FW) |           |           |
|--------|----|-------------------|-----------|-----------|--------------------|-----------|-----------|
|        |    | Control           | PG        | FG        | Control            | PG        | FG        |
| 120day | 0h | 1.80±0.40         | 0.49±0.45 | 1.48±0.16 | 0.51±0.02          | 0.12±0.04 | 0.20±0.01 |
|        | 2h | 1.15±0.25         | 0.92±0.06 | 0.35±0.08 | 0.36±0.02          | 0.12±0.01 | 0.02±0.01 |
|        | 4h | 0.67±0.14         | 0.43±0.07 | 0.58±0.20 | 0.21±0.01          | 0.09±0.02 | 0.04±0.01 |
| 45 day | 0h | 3.78±0.42         | 2.08±0.16 | 3.00±0.24 | 0.21±0.04          | 0.08±0.02 | 0.41±0.03 |
|        | 2h | 3.91±0.38         | 3.47±0.21 | 2.00±0.29 | 0.29±0.04          | 0.19±0.01 | 0.09±0.04 |
|        | 4h | 3.73±0.37         | 2.66±0.25 | 3.86±0.34 | 0.19±0.01          | 0.11±0.01 | 0.31±0.03 |

**Supplemental Table S2. Primer sequences used for Real-time PCR .**

| Maize ID             | Class           | Forward (5'-3')         | Reverse (5'-3')       |
|----------------------|-----------------|-------------------------|-----------------------|
| cassava4.1_017330m.g | rubisco         | CTCATACCTTCCACCACTCTCA  | TGGCAGCTTCCACATTGTC   |
| cassava4.1_008668m.g | FBPase          | GGAGTGTTTGCCCTCACC      | CCACTTCCGTTTGTGAGG    |
| cassava4.1_001840m.g | Susy            | CATGGCTCCCTCGGAGAT      | GTTTGCCAACCTTTGCTACC  |
| cassava4.1_000732m.g | SPS             | AGTGGGGCGGGTGCTATTGA    | CTTCGCTCGCGGGTGTTG    |
| cassava4.1_005409m.g | AGPase          | CAGAGCCAAGGCAAAGGTCA    | CCAGAGGTCATTAGCATGAGA |
| cassava4.1_002278m.g | starch synthase | GTGGAGAATTATTACTGGATGTG | TCCTTGAGCAGCCTTGAC    |
| cassava4.1_004345m.g | beta amylase    | CATCAGCCAAGGCCATCC      | AGGTAACCGTCCCGAAAT    |
| cassava4.1_006138m.g | hexokinase      | GTAACCTTCGGTCCTCACA     | GTAACCTTCGGTCCTCACA   |

### Supplemental Table S3. GO term enrichment of DE genes.

| GO.ID      | GO_class | Term                                        | Annotated | Significant | Expected | Fisher_pvalue | Group             |
|------------|----------|---------------------------------------------|-----------|-------------|----------|---------------|-------------------|
| GO:1901607 | BP       | alpha-amino acid biosynthetic process       | 63        | 20          | 10.48    | 0.00226       | 0FG_0CK           |
| GO:1901607 | BP       | alpha-amino acid biosynthetic process       | 63        | 19          | 9.34     | 0.00142       | 120d_0FG_120d_0CK |
| GO:1901605 | BP       | alpha-amino acid metabolic process          | 96        | 30          | 15.97    | 0.00028       | 0FG_0CK           |
| GO:1901605 | BP       | alpha-amino acid metabolic process          | 96        | 24          | 11.71    | 0.0004        | 120d_4FG_120d_4CK |
| GO:1901605 | BP       | alpha-amino acid metabolic process          | 96        | 27          | 14.23    | 0.00055       | 120d_0FG_120d_0CK |
| GO:1901605 | BP       | alpha-amino acid metabolic process          | 96        | 22          | 11.08    | 0.00114       | 120d_2FG_120d_2CK |
| GO:0042886 | BP       | amide transport                             | 66        | 16          | 3.26     | 8.50E-08      | 120d_0PG_120d_0CK |
| GO:0042886 | BP       | amide transport                             | 66        | 11          | 2.09     | 6.20E-06      | 120d_2PG_120d_2CK |
| GO:0043038 | BP       | amino acid activation                       | 60        | 18          | 9.98     | 0.00712       | 0FG_0CK           |
| GO:0043038 | BP       | amino acid activation                       | 60        | 17          | 8.48     | 0.00308       | 2FG_2CK           |
| GO:0009073 | BP       | aromatic amino acid family biosynthetic ... | 18        | 9           | 2.54     | 0.00032       | 2FG_2CK           |
| GO:0009073 | BP       | aromatic amino acid family biosynthetic ... | 18        | 8           | 2.2      | 0.00068       | 120d_4FG_120d_4CK |
| GO:0009073 | BP       | aromatic amino acid family biosynthetic ... | 18        | 9           | 2.08     | 6.50E-05      | 120d_2FG_120d_2CK |
| GO:0009072 | BP       | aromatic amino acid family metabolic pro... | 24        | 10          | 3.39     | 0.00091       | 2FG_2CK           |
| GO:0009072 | BP       | aromatic amino acid family metabolic pro... | 24        | 10          | 2.93     | 0.00027       | 120d_4FG_120d_4CK |
| GO:0009072 | BP       | aromatic amino acid family metabolic pro... | 24        | 10          | 3.56     | 0.00133       | 120d_0FG_120d_0CK |
| GO:0009072 | BP       | aromatic amino acid family metabolic pro... | 24        | 10          | 2.77     | 0.00017       | 120d_2FG_120d_2CK |
| GO:0046034 | BP       | ATP metabolic process                       | 51        | 14          | 6.22     | 0.00247       | 120d_4FG_120d_4CK |
| GO:0015986 | BP       | ATP synthesis coupled proton transport      | 23        | 10          | 2.81     | 0.00018       | 120d_4FG_120d_4CK |
| GO:0009058 | BP       | biosynthetic process                        | 2697      | 518         | 448.52   | 2.50E-05      | 0FG_0CK           |
| GO:0009058 | BP       | biosynthetic process                        | 2697      | 430         | 381.01   | 0.00112       | 2FG_2CK           |
| GO:0009058 | BP       | biosynthetic process                        | 2697      | 395         | 328.96   | 6.30E-06      | 120d_4FG_120d_4CK |
| GO:0016052 | BP       | carbohydrate catabolic process              | 89        | 28          | 14.8     | 0.0004        | 0FG_0CK           |
| GO:0016052 | BP       | carbohydrate catabolic process              | 89        | 29          | 12.57    | 7.20E-06      | 2FG_2CK           |
| GO:0016052 | BP       | carbohydrate catabolic process              | 89        | 29          | 10.86    | 3.50E-07      | 120d_4FG_120d_4CK |
| GO:0016052 | BP       | carbohydrate catabolic process              | 89        | 29          | 13.19    | 1.80E-05      | 120d_0FG_120d_0CK |
| GO:0016052 | BP       | carbohydrate catabolic process              | 89        | 8           | 2.82     | 0.00711       | 120d_2PG_120d_2CK |
| GO:0016052 | BP       | carbohydrate catabolic process              | 89        | 30          | 10.27    | 2.70E-08      | 120d_2FG_120d_2CK |
| GO:0005975 | BP       | carbohydrate metabolic process              | 778       | 40          | 25.21    | 0.00239       | 0PG_0CK           |
| GO:0005975 | BP       | carbohydrate metabolic process              | 778       | 139         | 109.91   | 0.00148       | 2FG_2CK           |
| GO:0015977 | BP       | carbon fixation                             | 10        | 6           | 1.66     | 0.0024        | 0FG_0CK           |
| GO:0046394 | BP       | carboxylic acid biosynthetic process        | 194       | 49          | 32.26    | 0.00132       | 0FG_0CK           |
| GO:0046394 | BP       | carboxylic acid biosynthetic process        | 194       | 41          | 27.41    | 0.0047        | 2FG_2CK           |
| GO:0046394 | BP       | carboxylic acid biosynthetic process        | 194       | 44          | 23.66    | 2.80E-05      | 120d_4FG_120d_4CK |
| GO:0046394 | BP       | carboxylic acid biosynthetic process        | 194       | 55          | 28.75    | 7.60E-07      | 120d_0FG_120d_0CK |
| GO:0046394 | BP       | carboxylic acid biosynthetic process        | 194       | 44          | 22.39    | 7.00E-06      | 120d_2FG_120d_2CK |
| GO:0019752 | BP       | carboxylic acid metabolic process           | 361       | 94          | 60.04    | 2.70E-06      | 0FG_0CK           |
| GO:0019752 | BP       | carboxylic acid metabolic process           | 361       | 82          | 51       | 5.40E-06      | 2FG_2CK           |
| GO:0019752 | BP       | carboxylic acid metabolic process           | 361       | 78          | 44.03    | 2.20E-07      | 120d_4FG_120d_4CK |
| GO:0019752 | BP       | carboxylic acid metabolic process           | 361       | 90          | 53.5     | 2.10E-07      | 120d_0FG_120d_0CK |
| GO:0019752 | BP       | carboxylic acid metabolic process           | 361       | 71          | 41.67    | 3.70E-06      | 120d_2FG_120d_2CK |

|            |    |                                             |      |     |        |          |                   |
|------------|----|---------------------------------------------|------|-----|--------|----------|-------------------|
| GO:0009056 | BP | catabolic process                           | 355  | 75  | 52.61  | 0.00073  | 120d_0FG_120d_0CK |
| GO:0008652 | BP | cellular amino acid biosynthetic process    | 111  | 36  | 18.46  | 3.00E-05 | 0FG_0CK           |
| GO:0008652 | BP | cellular amino acid biosynthetic process    | 111  | 30  | 15.68  | 0.00025  | 2FG_2CK           |
| GO:0008652 | BP | cellular amino acid biosynthetic process    | 111  | 28  | 13.54  | 0.00012  | 120d_4FG_120d_4CK |
| GO:0008652 | BP | cellular amino acid biosynthetic process    | 111  | 32  | 16.45  | 0.00011  | 120d_0FG_120d_0CK |
| GO:0008652 | BP | cellular amino acid biosynthetic process    | 111  | 24  | 12.81  | 0.00165  | 120d_2FG_120d_2CK |
| GO:0006520 | BP | cellular amino acid metabolic process       | 233  | 69  | 38.75  | 4.50E-07 | 0FG_0CK           |
| GO:0006520 | BP | cellular amino acid metabolic process       | 233  | 60  | 32.92  | 1.60E-06 | 2FG_2CK           |
| GO:0006520 | BP | cellular amino acid metabolic process       | 233  | 47  | 28.42  | 0.00031  | 120d_4FG_120d_4CK |
| GO:0006520 | BP | cellular amino acid metabolic process       | 233  | 57  | 34.53  | 6.20E-05 | 120d_0FG_120d_0CK |
| GO:0006520 | BP | cellular amino acid metabolic process       | 233  | 40  | 26.89  | 0.00637  | 120d_2FG_120d_2CK |
| GO:0044249 | BP | cellular biosynthetic process               | 2498 | 460 | 415.42 | 0.00376  | 0FG_0CK           |
| GO:0044249 | BP | cellular biosynthetic process               | 2498 | 353 | 304.69 | 0.00052  | 120d_4FG_120d_4CK |
| GO:0044262 | BP | cellular carbohydrate metabolic process     | 152  | 13  | 4.93   | 0.00132  | 0PG_0CK           |
| GO:0044262 | BP | cellular carbohydrate metabolic process     | 152  | 11  | 4.81   | 0.00894  | 120d_2PG_120d_2CK |
| GO:0044255 | BP | cellular lipid metabolic process            | 210  | 39  | 24.24  | 0.00172  | 120d_2FG_120d_2CK |
| GO:0044264 | BP | cellular polysaccharide metabolic proces... | 91   | 8   | 2.95   | 0.00923  | 0PG_0CK           |
| GO:0043623 | BP | cellular protein complex assembly           | 40   | 6   | 1.3    | 0.00168  | 0PG_0CK           |
| GO:0006732 | BP | coenzyme metabolic process                  | 74   | 7   | 2.34   | 0.0088   | 120d_2PG_120d_2CK |
| GO:0051188 | BP | cofactor biosynthetic process               | 62   | 19  | 9.19   | 0.00115  | 120d_0FG_120d_0CK |
| GO:0051186 | BP | cofactor metabolic process                  | 92   | 29  | 15.3   | 0.0003   | 0FG_0CK           |
| GO:0051186 | BP | cofactor metabolic process                  | 92   | 5   | 1.27   | 0.0089   | 2PG_2CK           |
| GO:0051186 | BP | cofactor metabolic process                  | 92   | 25  | 13     | 0.00074  | 2FG_2CK           |
| GO:0051186 | BP | cofactor metabolic process                  | 92   | 32  | 13.63  | 1.40E-06 | 120d_0FG_120d_0CK |
| GO:0051186 | BP | cofactor metabolic process                  | 92   | 8   | 2.91   | 0.00863  | 120d_2PG_120d_2CK |
| GO:0005984 | BP | disaccharide metabolic process              | 37   | 13  | 6.15   | 0.00493  | 0FG_0CK           |
| GO:0005984 | BP | disaccharide metabolic process              | 37   | 12  | 5.23   | 0.00367  | 2FG_2CK           |
| GO:0005984 | BP | disaccharide metabolic process              | 37   | 6   | 1.83   | 0.00884  | 120d_0PG_120d_0CK |
| GO:0015985 | BP | energy coupled proton transport, down el... | 23   | 10  | 2.81   | 0.00018  | 120d_4FG_120d_4CK |
| GO:0006633 | BP | fatty acid biosynthetic process             | 76   | 22  | 11.26  | 0.00114  | 120d_0FG_120d_0CK |
| GO:0006633 | BP | fatty acid biosynthetic process             | 76   | 20  | 8.77   | 0.00029  | 120d_2FG_120d_2CK |
| GO:0006631 | BP | fatty acid metabolic process                | 91   | 8   | 2.95   | 0.00923  | 0PG_0CK           |
| GO:0006631 | BP | fatty acid metabolic process                | 91   | 27  | 13.49  | 0.00021  | 120d_0FG_120d_0CK |
| GO:0006631 | BP | fatty acid metabolic process                | 91   | 25  | 10.5   | 2.40E-05 | 120d_2FG_120d_2CK |
| GO:0006091 | BP | generation of precursor metabolites and ... | 99   | 35  | 16.46  | 4.60E-06 | 0FG_0CK           |
| GO:0006091 | BP | generation of precursor metabolites and ... | 99   | 36  | 13.99  | 2.50E-08 | 2FG_2CK           |
| GO:0006091 | BP | generation of precursor metabolites and ... | 99   | 32  | 12.08  | 1.10E-07 | 120d_4FG_120d_4CK |
| GO:0006091 | BP | generation of precursor metabolites and ... | 99   | 29  | 14.67  | 0.00016  | 120d_0FG_120d_0CK |
| GO:0006091 | BP | generation of precursor metabolites and ... | 99   | 35  | 11.43  | 4.30E-10 | 120d_2FG_120d_2CK |
| GO:0006007 | BP | glucose catabolic process                   | 76   | 25  | 12.64  | 0.00037  | 0FG_0CK           |
| GO:0006007 | BP | glucose catabolic process                   | 76   | 26  | 10.74  | 7.90E-06 | 2FG_2CK           |
| GO:0006007 | BP | glucose catabolic process                   | 76   | 27  | 9.27   | 1.20E-07 | 120d_4FG_120d_4CK |
| GO:0006007 | BP | glucose catabolic process                   | 76   | 23  | 11.26  | 0.00045  | 120d_0FG_120d_0CK |
| GO:0006007 | BP | glucose catabolic process                   | 76   | 25  | 8.77   | 6.50E-07 | 120d_2FG_120d_2CK |

|            |    |                                             |      |      |         |          |                   |
|------------|----|---------------------------------------------|------|------|---------|----------|-------------------|
| GO:0006006 | BP | glucose metabolic process                   | 86   | 30   | 14.3    | 2.90E-05 | 0FG_0CK           |
| GO:0006006 | BP | glucose metabolic process                   | 86   | 29   | 12.15   | 3.30E-06 | 2FG_2CK           |
| GO:0006006 | BP | glucose metabolic process                   | 86   | 30   | 10.49   | 3.90E-08 | 120d_4FG_120d_4CK |
| GO:0006006 | BP | glucose metabolic process                   | 86   | 25   | 12.74   | 0.00051  | 120d_0FG_120d_0CK |
| GO:0006006 | BP | glucose metabolic process                   | 86   | 27   | 9.93    | 6.70E-07 | 120d_2FG_120d_2CK |
| GO:0009084 | BP | glutamine family amino acid biosynthetic... | 12   | 6    | 1.7     | 0.00339  | 2FG_2CK           |
| GO:0009084 | BP | glutamine family amino acid biosynthetic... | 12   | 6    | 1.46    | 0.00156  | 120d_4FG_120d_4CK |
| GO:0009064 | BP | glutamine family amino acid metabolic pr... | 21   | 8    | 2.97    | 0.00572  | 2FG_2CK           |
| GO:0009064 | BP | glutamine family amino acid metabolic pr... | 21   | 8    | 2.56    | 0.00225  | 120d_4FG_120d_4CK |
| GO:0006096 | BP | glycolysis                                  | 58   | 19   | 9.65    | 0.00192  | 0FG_0CK           |
| GO:0006096 | BP | glycolysis                                  | 58   | 19   | 8.19    | 0.00025  | 2FG_2CK           |
| GO:0006096 | BP | glycolysis                                  | 58   | 20   | 7.07    | 8.70E-06 | 120d_4FG_120d_4CK |
| GO:0006096 | BP | glycolysis                                  | 58   | 19   | 6.69    | 1.50E-05 | 120d_2FG_120d_2CK |
| GO:0019320 | BP | hexose catabolic process                    | 76   | 25   | 12.64   | 0.00037  | 0FG_0CK           |
| GO:0019320 | BP | hexose catabolic process                    | 76   | 26   | 10.74   | 7.90E-06 | 2FG_2CK           |
| GO:0019320 | BP | hexose catabolic process                    | 76   | 27   | 9.27    | 1.20E-07 | 120d_4FG_120d_4CK |
| GO:0019320 | BP | hexose catabolic process                    | 76   | 23   | 11.26   | 0.00045  | 120d_0FG_120d_0CK |
| GO:0019320 | BP | hexose catabolic process                    | 76   | 25   | 8.77    | 6.50E-07 | 120d_2FG_120d_2CK |
| GO:0019318 | BP | hexose metabolic process                    | 105  | 34   | 17.46   | 5.20E-05 | 0FG_0CK           |
| GO:0019318 | BP | hexose metabolic process                    | 105  | 35   | 14.83   | 4.60E-07 | 2FG_2CK           |
| GO:0019318 | BP | hexose metabolic process                    | 105  | 32   | 12.81   | 4.90E-07 | 120d_4FG_120d_4CK |
| GO:0019318 | BP | hexose metabolic process                    | 105  | 29   | 15.56   | 0.00048  | 120d_0FG_120d_0CK |
| GO:0019318 | BP | hexose metabolic process                    | 105  | 28   | 12.12   | 1.50E-05 | 120d_2FG_120d_2CK |
| GO:1902600 | BP | hydrogen ion transmembrane transport        | 60   | 16   | 7.32    | 0.00174  | 120d_4FG_120d_4CK |
| GO:0006818 | BP | hydrogen transport                          | 71   | 18   | 8.66    | 0.00173  | 120d_4FG_120d_4CK |
| GO:0008299 | BP | isoprenoid biosynthetic process             | 33   | 12   | 4.66    | 0.00121  | 2FG_2CK           |
| GO:0008299 | BP | isoprenoid biosynthetic process             | 33   | 10   | 3.81    | 0.00309  | 120d_2FG_120d_2CK |
| GO:0006720 | BP | isoprenoid metabolic process                | 33   | 12   | 4.66    | 0.00121  | 2FG_2CK           |
| GO:0006720 | BP | isoprenoid metabolic process                | 33   | 10   | 3.81    | 0.00309  | 120d_2FG_120d_2CK |
| GO:0008610 | BP | lipid biosynthetic process                  | 170  | 42   | 25.19   | 0.00044  | 120d_0FG_120d_0CK |
| GO:0008610 | BP | lipid biosynthetic process                  | 170  | 37   | 19.62   | 9.30E-05 | 120d_2FG_120d_2CK |
| GO:0006563 | BP | L-serine metabolic process                  | 17   | 11   | 2.83    | 1.20E-05 | 0FG_0CK           |
| GO:0006563 | BP | L-serine metabolic process                  | 17   | 7    | 2.4     | 0.00589  | 2FG_2CK           |
| GO:0006563 | BP | L-serine metabolic process                  | 17   | 5    | 0.84    | 0.00108  | 120d_0PG_120d_0CK |
| GO:0006563 | BP | L-serine metabolic process                  | 17   | 8    | 1.96    | 0.00029  | 120d_2FG_120d_2CK |
| GO:0008152 | BP | metabolic process                           | 8536 | 1481 | 1419.56 | 7.10E-05 | 0FG_0CK           |
| GO:0008152 | BP | metabolic process                           | 8536 | 1268 | 1205.89 | 1.80E-05 | 2FG_2CK           |
| GO:0008152 | BP | metabolic process                           | 8536 | 1102 | 1041.17 | 7.90E-06 | 120d_4FG_120d_4CK |
| GO:0008152 | BP | metabolic process                           | 8536 | 1330 | 1264.94 | 1.10E-05 | 120d_0FG_120d_0CK |
| GO:0008152 | BP | metabolic process                           | 8536 | 1046 | 985.22  | 4.80E-06 | 120d_2FG_120d_2CK |
| GO:0072330 | BP | monocarboxylic acid biosynthetic process    | 83   | 23   | 12.3    | 0.0017   | 120d_0FG_120d_0CK |
| GO:0072330 | BP | monocarboxylic acid biosynthetic process    | 83   | 20   | 9.58    | 0.00097  | 120d_2FG_120d_2CK |
| GO:0032787 | BP | monocarboxylic acid metabolic process       | 102  | 28   | 15.12   | 0.00067  | 120d_0FG_120d_0CK |
| GO:0032787 | BP | monocarboxylic acid metabolic process       | 102  | 25   | 11.77   | 0.00018  | 120d_2FG_120d_2CK |



|            |    |                                                |      |     |        |          |                   |
|------------|----|------------------------------------------------|------|-----|--------|----------|-------------------|
| GO:0046365 | BP | monosaccharide catabolic process               | 76   | 25  | 12.64  | 0.00037  | 0FG_0CK           |
| GO:0046365 | BP | monosaccharide catabolic process               | 76   | 26  | 10.74  | 7.90E-06 | 2FG_2CK           |
| GO:0046365 | BP | monosaccharide catabolic process               | 76   | 27  | 9.27   | 1.20E-07 | 120d_4FG_120d_4CK |
| GO:0046365 | BP | monosaccharide catabolic process               | 76   | 23  | 11.26  | 0.00045  | 120d_0FG_120d_0CK |
| GO:0046365 | BP | monosaccharide catabolic process               | 76   | 25  | 8.77   | 6.50E-07 | 120d_2FG_120d_2CK |
| GO:0005996 | BP | monosaccharide metabolic process               | 106  | 34  | 17.63  | 6.40E-05 | 0FG_0CK           |
| GO:0005996 | BP | monosaccharide metabolic process               | 106  | 36  | 14.97  | 1.90E-07 | 2FG_2CK           |
| GO:0005996 | BP | monosaccharide metabolic process               | 106  | 32  | 12.93  | 6.20E-07 | 120d_4FG_120d_4CK |
| GO:0005996 | BP | monosaccharide metabolic process               | 106  | 29  | 15.71  | 0.00057  | 120d_0FG_120d_0CK |
| GO:0005996 | BP | monosaccharide metabolic process               | 106  | 28  | 12.23  | 1.80E-05 | 120d_2FG_120d_2CK |
| GO:0043086 | BP | negative regulation of catalytic activit...    | 66   | 7   | 2.14   | 0.00533  | 0PG_0CK           |
| GO:0044092 | BP | negative regulation of molecular functio...    | 66   | 7   | 2.14   | 0.00533  | 0PG_0CK           |
| GO:0046496 | BP | nicotinamide nucleotide metabolic proces...    | 21   | 8   | 2.97   | 0.00572  | 2FG_2CK           |
| GO:0071705 | BP | nitrogen compound transport                    | 103  | 16  | 5.08   | 4.10E-05 | 120d_0PG_120d_0CK |
| GO:0071705 | BP | nitrogen compound transport                    | 103  | 11  | 3.26   | 0.00041  | 120d_2PG_120d_2CK |
| GO:0033865 | BP | nucleoside bisphosphate metabolic proces...    | 17   | 9   | 2.83   | 0.00065  | 0FG_0CK           |
| GO:0006753 | BP | nucleoside phosphate metabolic process         | 193  | 14  | 6.25   | 0.00407  | 0PG_0CK           |
| GO:0009117 | BP | nucleotide metabolic process                   | 187  | 14  | 6.06   | 0.00306  | 0PG_0CK           |
| GO:0006857 | BP | oligopeptide transport                         | 66   | 16  | 3.26   | 8.50E-08 | 120d_0PG_120d_0CK |
| GO:0006857 | BP | oligopeptide transport                         | 66   | 11  | 2.09   | 6.20E-06 | 120d_2PG_120d_2CK |
| GO:0006857 | BP | oligopeptide transport                         | 66   | 15  | 7.62   | 0.00718  | 120d_2FG_120d_2CK |
| GO:0016053 | BP | organic acid biosynthetic process              | 194  | 49  | 32.26  | 0.00132  | 0FG_0CK           |
| GO:0016053 | BP | organic acid biosynthetic process              | 194  | 41  | 27.41  | 0.0047   | 2FG_2CK           |
| GO:0016053 | BP | organic acid biosynthetic process              | 194  | 44  | 23.66  | 2.80E-05 | 120d_4FG_120d_4CK |
| GO:0016053 | BP | organic acid biosynthetic process              | 194  | 55  | 28.75  | 7.60E-07 | 120d_0FG_120d_0CK |
| GO:0016053 | BP | organic acid biosynthetic process              | 194  | 44  | 22.39  | 7.00E-06 | 120d_2FG_120d_2CK |
| GO:0006082 | BP | organic acid metabolic process                 | 362  | 94  | 60.2   | 3.10E-06 | 0FG_0CK           |
| GO:0006082 | BP | organic acid metabolic process                 | 362  | 83  | 51.14  | 3.20E-06 | 2FG_2CK           |
| GO:0006082 | BP | organic acid metabolic process                 | 362  | 78  | 44.15  | 2.50E-07 | 120d_4FG_120d_4CK |
| GO:0006082 | BP | organic acid metabolic process                 | 362  | 91  | 53.64  | 1.20E-07 | 120d_0FG_120d_0CK |
| GO:0006082 | BP | organic acid metabolic process                 | 362  | 72  | 41.78  | 2.10E-06 | 120d_2FG_120d_2CK |
| GO:1901576 | BP | organic substance biosynthetic process         | 2535 | 468 | 421.58 | 0.00281  | 0FG_0CK           |
| GO:1901576 | BP | organic substance biosynthetic process         | 2535 | 360 | 309.2  | 0.0003   | 120d_4FG_120d_4CK |
| GO:1901575 | BP | organic substance catabolic process            | 326  | 73  | 48.31  | 0.00014  | 120d_0FG_120d_0CK |
| GO:1901575 | BP | organic substance catabolic process            | 326  | 53  | 37.63  | 0.006    | 120d_2FG_120d_2CK |
| GO:1901566 | BP | organonitrogen compound biosynthetic<br>pro... | 279  | 74  | 46.4   | 1.60E-05 | 0FG_0CK           |
| GO:1901566 | BP | organonitrogen compound biosynthetic<br>pro... | 279  | 65  | 39.41  | 2.20E-05 | 2FG_2CK           |
| GO:1901566 | BP | organonitrogen compound biosynthetic<br>pro... | 279  | 56  | 34.03  | 9.90E-05 | 120d_4FG_120d_4CK |
| GO:1901566 | BP | organonitrogen compound biosynthetic<br>pro... | 279  | 67  | 41.34  | 2.80E-05 | 120d_0FG_120d_0CK |
| GO:1901564 | BP | organonitrogen compound metabolic              | 576  | 138 | 95.79  | 2.30E-06 | 0FG_0CK           |

|            |    |                                             |      |     |        |          |                   |  |
|------------|----|---------------------------------------------|------|-----|--------|----------|-------------------|--|
|            |    | proces...                                   |      |     |        |          |                   |  |
| GO:1901564 | BP | organonitrogen compound metabolic proces... | 576  | 124 | 81.37  | 4.80E-07 | 2FG_2CK           |  |
| GO:1901564 | BP | organonitrogen compound metabolic proces... | 576  | 98  | 70.26  | 0.00032  | 120d_4FG_120d_4CK |  |
| GO:1901564 | BP | organonitrogen compound metabolic proces... | 576  | 126 | 85.36  | 2.10E-06 | 120d_0FG_120d_0CK |  |
| GO:0055114 | BP | oxidation-reduction process                 | 1345 | 274 | 223.68 | 6.90E-05 | 0FG_0CK           |  |
| GO:0055114 | BP | oxidation-reduction process                 | 1345 | 37  | 18.61  | 2.60E-05 | 2PG_2CK           |  |
| GO:0055114 | BP | oxidation-reduction process                 | 1345 | 244 | 190.01 | 7.00E-06 | 2FG_2CK           |  |
| GO:0055114 | BP | oxidation-reduction process                 | 1345 | 235 | 164.05 | 1.00E-09 | 120d_4FG_120d_4CK |  |
| GO:0055114 | BP | oxidation-reduction process                 | 1345 | 101 | 66.36  | 7.10E-06 | 120d_0PG_120d_0CK |  |
| GO:0055114 | BP | oxidation-reduction process                 | 1345 | 261 | 199.31 | 5.90E-07 | 120d_0FG_120d_0CK |  |
| GO:0055114 | BP | oxidation-reduction process                 | 1345 | 68  | 42.61  | 5.10E-05 | 120d_2PG_120d_2CK |  |
| GO:0055114 | BP | oxidation-reduction process                 | 1345 | 231 | 155.24 | 3.50E-11 | 120d_2FG_120d_2CK |  |
| GO:0043436 | BP | oxoacid metabolic process                   | 361  | 94  | 60.04  | 2.70E-06 | 0FG_0CK           |  |
| GO:0043436 | BP | oxoacid metabolic process                   | 361  | 82  | 51     | 5.40E-06 | 2FG_2CK           |  |
| GO:0043436 | BP | oxoacid metabolic process                   | 361  | 78  | 44.03  | 2.20E-07 | 120d_4FG_120d_4CK |  |
| GO:0043436 | BP | oxoacid metabolic process                   | 361  | 90  | 53.5   | 2.10E-07 | 120d_0FG_120d_0CK |  |
| GO:0043436 | BP | oxoacid metabolic process                   | 361  | 71  | 41.67  | 3.70E-06 | 120d_2FG_120d_2CK |  |
| GO:0015833 | BP | peptide transport                           | 66   | 16  | 3.26   | 8.50E-08 | 120d_0PG_120d_0CK |  |
| GO:0015833 | BP | peptide transport                           | 66   | 11  | 2.09   | 6.20E-06 | 120d_2PG_120d_2CK |  |
| GO:0015833 | BP | peptide transport                           | 66   | 15  | 7.62   | 0.00718  | 120d_2FG_120d_2CK |  |
| GO:0015979 | BP | photosynthesis                              | 72   | 48  | 11.97  | 2.90E-21 | 0FG_0CK           |  |
| GO:0015979 | BP | photosynthesis                              | 72   | 6   | 1      | 0.00047  | 2PG_2CK           |  |
| GO:0015979 | BP | photosynthesis                              | 72   | 51  | 10.17  | 8.20E-28 | 2FG_2CK           |  |
| GO:0015979 | BP | photosynthesis                              | 72   | 47  | 8.78   | 3.90E-26 | 120d_4FG_120d_4CK |  |
| GO:0015979 | BP | photosynthesis                              | 72   | 51  | 10.67  | 8.20E-27 | 120d_0FG_120d_0CK |  |
| GO:0015979 | BP | photosynthesis                              | 72   | 48  | 8.31   | 2.20E-28 | 120d_2FG_120d_2CK |  |
| GO:0009765 | BP | photosynthesis, light harvesting            | 12   | 9   | 2      | 1.30E-05 | 0FG_0CK           |  |
| GO:0009765 | BP | photosynthesis, light harvesting            | 12   | 9   | 1.7    | 3.20E-06 | 2FG_2CK           |  |
| GO:0009765 | BP | photosynthesis, light harvesting            | 12   | 9   | 1.46   | 9.10E-07 | 120d_4FG_120d_4CK |  |
| GO:0009765 | BP | photosynthesis, light harvesting            | 12   | 10  | 1.78   | 2.50E-07 | 120d_0FG_120d_0CK |  |
| GO:0009765 | BP | photosynthesis, light harvesting            | 12   | 10  | 1.39   | 2.20E-08 | 120d_2FG_120d_2CK |  |
| GO:0019684 | BP | photosynthesis, light reaction              | 20   | 12  | 3.33   | 1.50E-05 | 0FG_0CK           |  |
| GO:0019684 | BP | photosynthesis, light reaction              | 20   | 13  | 2.83   | 2.50E-07 | 2FG_2CK           |  |
| GO:0019684 | BP | photosynthesis, light reaction              | 20   | 11  | 2.44   | 5.00E-06 | 120d_4FG_120d_4CK |  |
| GO:0019684 | BP | photosynthesis, light reaction              | 20   | 12  | 2.96   | 4.30E-06 | 120d_0FG_120d_0CK |  |
| GO:0019684 | BP | photosynthesis, light reaction              | 20   | 12  | 2.31   | 2.80E-07 | 120d_2FG_120d_2CK |  |
| GO:0046148 | BP | pigment biosynthetic process                | 14   | 7   | 2.33   | 0.00403  | 0FG_0CK           |  |
| GO:0046148 | BP | pigment biosynthetic process                | 14   | 7   | 1.98   | 0.00153  | 2FG_2CK           |  |
| GO:0046148 | BP | pigment biosynthetic process                | 14   | 9   | 1.71   | 6.60E-06 | 120d_4FG_120d_4CK |  |
| GO:0046148 | BP | pigment biosynthetic process                | 14   | 10  | 2.07   | 2.80E-06 | 120d_0FG_120d_0CK |  |
| GO:0046148 | BP | pigment biosynthetic process                | 14   | 7   | 1.62   | 0.00044  | 120d_2FG_120d_2CK |  |

|            |    |                                             |     |     |       |          |                   |
|------------|----|---------------------------------------------|-----|-----|-------|----------|-------------------|
| GO:0042440 | BP | pigment metabolic process                   | 19  | 9   | 3.16  | 0.00179  | 0FG_0CK           |
| GO:0042440 | BP | pigment metabolic process                   | 19  | 9   | 2.68  | 0.00053  | 2FG_2CK           |
| GO:0042440 | BP | pigment metabolic process                   | 19  | 10  | 2.32  | 2.30E-05 | 120d_4FG_120d_4CK |
| GO:0042440 | BP | pigment metabolic process                   | 19  | 12  | 2.82  | 2.00E-06 | 120d_0FG_120d_0CK |
| GO:0042440 | BP | pigment metabolic process                   | 19  | 9   | 2.19  | 0.00011  | 120d_2FG_120d_2CK |
| GO:0006779 | BP | porphyrin-containing compound biosynthet... | 11  | 6   | 1.34  | 0.00087  | 120d_4FG_120d_4CK |
| GO:0006779 | BP | porphyrin-containing compound biosynthet... | 11  | 8   | 1.63  | 2.50E-05 | 120d_0FG_120d_0CK |
| GO:0006779 | BP | porphyrin-containing compound biosynthet... | 11  | 5   | 1.27  | 0.00516  | 120d_2FG_120d_2CK |
| GO:0006778 | BP | porphyrin-containing compound metabolic ... | 16  | 7   | 1.95  | 0.00166  | 120d_4FG_120d_4CK |
| GO:0006778 | BP | porphyrin-containing compound metabolic ... | 16  | 10  | 2.37  | 1.70E-05 | 120d_0FG_120d_0CK |
| GO:0006778 | BP | porphyrin-containing compound metabolic ... | 16  | 7   | 1.85  | 0.00119  | 120d_2FG_120d_2CK |
| GO:0006457 | BP | protein folding                             | 131 | 12  | 4.25  | 0.00111  | 0PG_0CK           |
| GO:0051258 | BP | protein polymerization                      | 33  | 6   | 1.07  | 0.00059  | 0PG_0CK           |
| GO:0015992 | BP | proton transport                            | 71  | 18  | 8.66  | 0.00173  | 120d_4FG_120d_4CK |
| GO:0034032 | BP | purine nucleoside bisphosphate metabolic... | 17  | 9   | 2.83  | 0.00065  | 0FG_0CK           |
| GO:0019362 | BP | pyridine nucleotide metabolic process       | 21  | 8   | 2.97  | 0.00572  | 2FG_2CK           |
| GO:0019362 | BP | pyridine nucleotide metabolic process       | 21  | 9   | 3.11  | 0.00183  | 120d_0FG_120d_0CK |
| GO:0072524 | BP | pyridine-containing compound metabolic p... | 27  | 10  | 3.81  | 0.00262  | 2FG_2CK           |
| GO:0072524 | BP | pyridine-containing compound metabolic p... | 27  | 11  | 4     | 0.00096  | 120d_0FG_120d_0CK |
| GO:0033875 | BP | ribonucleoside bisphosphate metabolic pr... | 17  | 9   | 2.83  | 0.00065  | 0FG_0CK           |
| GO:0009070 | BP | serine family amino acid biosynthetic pr... | 10  | 6   | 1.66  | 0.0024   | 0FG_0CK           |
| GO:0009070 | BP | serine family amino acid biosynthetic pr... | 10  | 6   | 1.48  | 0.00129  | 120d_0FG_120d_0CK |
| GO:0009069 | BP | serine family amino acid metabolic proce... | 26  | 14  | 4.32  | 1.60E-05 | 0FG_0CK           |
| GO:0009069 | BP | serine family amino acid metabolic proce... | 26  | 6   | 1.28  | 0.00139  | 120d_0PG_120d_0CK |
| GO:0009069 | BP | serine family amino acid metabolic proce... | 26  | 10  | 3     | 0.00038  | 120d_2FG_120d_2CK |
| GO:0044711 | BP | single-organism biosynthetic process        | 514 | 106 | 72.61 | 2.40E-05 | 2FG_2CK           |
| GO:0044711 | BP | single-organism biosynthetic process        | 514 | 92  | 62.69 | 7.80E-05 | 120d_4FG_120d_4CK |
| GO:0044711 | BP | single-organism biosynthetic process        | 514 | 114 | 76.17 | 3.30E-06 | 120d_0FG_120d_0CK |
| GO:0044711 | BP | single-organism biosynthetic process        | 514 | 92  | 59.33 | 9.10E-06 | 120d_2FG_120d_2CK |
| GO:0044724 | BP | single-organism carbohydrate catabolic p... | 79  | 25  | 13.14 | 0.00072  | 0FG_0CK           |
| GO:0044724 | BP | single-organism carbohydrate catabolic p... | 79  | 26  | 11.16 | 1.70E-05 | 2FG_2CK           |
| GO:0044724 | BP | single-organism carbohydrate catabolic p... | 79  | 29  | 9.64  | 1.80E-08 | 120d_4FG_120d_4CK |
| GO:0044724 | BP | single-organism carbohydrate catabolic p... | 79  | 25  | 11.71 | 0.00012  | 120d_0FG_120d_0CK |
| GO:0044724 | BP | single-organism carbohydrate catabolic p... | 79  | 8   | 2.5   | 0.00344  | 120d_2PG_120d_2CK |
| GO:0044724 | BP | single-organism carbohydrate catabolic p... | 79  | 27  | 9.12  | 9.50E-08 | 120d_2FG_120d_2CK |
| GO:0044723 | BP | single-organism carbohydrate metabolic p... | 290 | 73  | 40.97 | 3.20E-07 | 2FG_2CK           |

|            |    |                                             |      |     |        |          |                   |
|------------|----|---------------------------------------------|------|-----|--------|----------|-------------------|
| GO:0044723 | BP | single-organism carbohydrate metabolic p... | 290  | 53  | 33.47  | 0.00043  | 120d_2FG_120d_2CK |
| GO:0044712 | BP | single-organism catabolic process           | 168  | 39  | 20.49  | 4.60E-05 | 120d_4FG_120d_4CK |
| GO:0044712 | BP | single-organism catabolic process           | 168  | 43  | 24.9   | 0.00017  | 120d_0FG_120d_0CK |
| GO:0044712 | BP | single-organism catabolic process           | 168  | 12  | 5.32   | 0.00715  | 120d_2PG_120d_2CK |
| GO:0044712 | BP | single-organism catabolic process           | 168  | 34  | 19.39  | 0.00072  | 120d_2FG_120d_2CK |
| GO:0044710 | BP | single-organism metabolic process           | 2620 | 508 | 435.71 | 1.00E-05 | 0FG_0CK           |
| GO:0044710 | BP | single-organism metabolic process           | 2620 | 467 | 370.13 | 6.70E-10 | 2FG_2CK           |
| GO:0044710 | BP | single-organism metabolic process           | 2620 | 414 | 319.57 | 1.80E-10 | 120d_4FG_120d_4CK |
| GO:0044710 | BP | single-organism metabolic process           | 2620 | 165 | 129.26 | 0.00019  | 120d_0PG_120d_0CK |
| GO:0044710 | BP | single-organism metabolic process           | 2620 | 486 | 388.25 | 9.60E-10 | 120d_0FG_120d_0CK |
| GO:0044710 | BP | single-organism metabolic process           | 2620 | 108 | 82.99  | 0.00113  | 120d_2PG_120d_2CK |
| GO:0044710 | BP | single-organism metabolic process           | 2620 | 406 | 302.4  | 1.10E-12 | 120d_2FG_120d_2CK |
| GO:0044699 | BP | single-organism process                     | 4479 | 694 | 632.75 | 0.00037  | 2FG_2CK           |
| GO:0044699 | BP | single-organism process                     | 4479 | 597 | 546.32 | 0.0015   | 120d_4FG_120d_4CK |
| GO:0044699 | BP | single-organism process                     | 4479 | 259 | 220.97 | 0.00041  | 120d_0PG_120d_0CK |
| GO:0044699 | BP | single-organism process                     | 4479 | 739 | 663.74 | 2.40E-05 | 120d_0FG_120d_0CK |
| GO:0044699 | BP | single-organism process                     | 4479 | 169 | 141.88 | 0.00168  | 120d_2PG_120d_2CK |
| GO:0044699 | BP | single-organism process                     | 4479 | 581 | 516.96 | 6.10E-05 | 120d_2FG_120d_2CK |
| GO:0044283 | BP | small molecule biosynthetic process         | 220  | 53  | 36.59  | 0.00264  | 0FG_0CK           |
| GO:0044283 | BP | small molecule biosynthetic process         | 220  | 45  | 26.83  | 0.0003   | 120d_4FG_120d_4CK |
| GO:0044283 | BP | small molecule biosynthetic process         | 220  | 59  | 32.6   | 2.30E-06 | 120d_0FG_120d_0CK |
| GO:0044283 | BP | small molecule biosynthetic process         | 220  | 47  | 25.39  | 1.80E-05 | 120d_2FG_120d_2CK |
| GO:0044282 | BP | small molecule catabolic process            | 19   | 5   | 0.6    | 0.00025  | 120d_2PG_120d_2CK |
| GO:0044281 | BP | small molecule metabolic process            | 665  | 155 | 110.59 | 3.00E-06 | 0FG_0CK           |
| GO:0044281 | BP | small molecule metabolic process            | 665  | 138 | 93.95  | 9.60E-07 | 2FG_2CK           |
| GO:0044281 | BP | small molecule metabolic process            | 665  | 130 | 81.11  | 1.40E-08 | 120d_4FG_120d_4CK |
| GO:0044281 | BP | small molecule metabolic process            | 665  | 147 | 98.55  | 1.40E-07 | 120d_0FG_120d_0CK |
| GO:0044281 | BP | small molecule metabolic process            | 665  | 111 | 76.75  | 2.80E-05 | 120d_2FG_120d_2CK |
| GO:0006814 | BP | sodium ion transport                        | 10   | 3   | 0.32   | 0.00342  | 0PG_0CK           |
| GO:0006694 | BP | steroid biosynthetic process                | 13   | 4   | 0.41   | 0.00056  | 120d_2PG_120d_2CK |
| GO:0008202 | BP | steroid metabolic process                   | 14   | 4   | 0.44   | 0.00077  | 120d_2PG_120d_2CK |
| GO:0005985 | BP | sucrose metabolic process                   | 12   | 3   | 0.39   | 0.00597  | 0PG_0CK           |
| GO:0005985 | BP | sucrose metabolic process                   | 12   | 7   | 2      | 0.00127  | 0FG_0CK           |
| GO:0005985 | BP | sucrose metabolic process                   | 12   | 6   | 1.7    | 0.00339  | 2FG_2CK           |
| GO:0033014 | BP | tetrapyrrole biosynthetic process           | 23   | 11  | 3.41   | 0.00018  | 120d_0FG_120d_0CK |
| GO:0033013 | BP | tetrapyrrole metabolic process              | 28   | 11  | 4.66   | 0.00355  | 0FG_0CK           |
| GO:0033013 | BP | tetrapyrrole metabolic process              | 28   | 13  | 4.15   | 6.70E-05 | 120d_0FG_120d_0CK |
| GO:0033013 | BP | tetrapyrrole metabolic process              | 28   | 9   | 3.23   | 0.00316  | 120d_2FG_120d_2CK |
| GO:0006412 | BP | translation                                 | 493  | 178 | 81.99  | 6.90E-27 | 0FG_0CK           |
| GO:0006412 | BP | translation                                 | 493  | 141 | 69.65  | 9.40E-18 | 2FG_2CK           |
| GO:0006412 | BP | translation                                 | 493  | 150 | 60.13  | 1.90E-28 | 120d_4FG_120d_4CK |
| GO:0006414 | BP | translational elongation                    | 26   | 13  | 4.32   | 8.70E-05 | 0FG_0CK           |
| GO:0006414 | BP | translational elongation                    | 26   | 11  | 3.17   | 0.00011  | 120d_4FG_120d_4CK |
| GO:0055085 | BP | transmembrane transport                     | 715  | 50  | 35.27  | 0.00749  | 120d_0PG_120d_0CK |

|            |    |                                             |      |     |        |          |                   |
|------------|----|---------------------------------------------|------|-----|--------|----------|-------------------|
| GO:0043039 | BP | tRNA aminoacylation                         | 60   | 18  | 9.98   | 0.00712  | 0FG_0CK           |
| GO:0043039 | BP | tRNA aminoacylation                         | 60   | 17  | 8.48   | 0.00308  | 2FG_2CK           |
| GO:0006418 | BP | tRNA aminoacylation for protein translat... | 57   | 18  | 9.48   | 0.00392  | 0FG_0CK           |
| GO:0006418 | BP | tRNA aminoacylation for protein translat... | 57   | 17  | 8.05   | 0.00168  | 2FG_2CK           |
| GO:0071944 | CC | cell periphery                              | 202  | 14  | 5.21   | 0.00061  | 0PG_0CK           |
| GO:0071944 | CC | cell periphery                              | 202  | 13  | 5.74   | 0.0045   | 120d_2PG_120d_2CK |
| GO:0005618 | CC | cell wall                                   | 130  | 12  | 3.36   | 0.00011  | 0PG_0CK           |
| GO:0009507 | CC | chloroplast                                 | 23   | 15  | 3.92   | 3.30E-07 | 0FG_0CK           |
| GO:0009507 | CC | chloroplast                                 | 23   | 13  | 3.31   | 2.90E-06 | 2FG_2CK           |
| GO:0009507 | CC | chloroplast                                 | 23   | 10  | 2.93   | 0.00025  | 120d_4FG_120d_4CK |
| GO:0009507 | CC | chloroplast                                 | 23   | 13  | 3.09   | 1.30E-06 | 120d_0FG_120d_0CK |
| GO:0009507 | CC | chloroplast                                 | 23   | 10  | 2.43   | 5.10E-05 | 120d_2FG_120d_2CK |
| GO:0005737 | CC | cytoplasm                                   | 908  | 254 | 154.71 | 8.30E-21 | 0FG_0CK           |
| GO:0005737 | CC | cytoplasm                                   | 908  | 207 | 130.68 | 1.10E-14 | 2FG_2CK           |
| GO:0005737 | CC | cytoplasm                                   | 908  | 208 | 115.78 | 4.80E-22 | 120d_4FG_120d_4CK |
| GO:0044444 | CC | cytoplasmic part                            | 720  | 208 | 122.68 | 2.40E-18 | 0FG_0CK           |
| GO:0044444 | CC | cytoplasmic part                            | 720  | 172 | 103.62 | 6.00E-14 | 2FG_2CK           |
| GO:0044444 | CC | cytoplasmic part                            | 720  | 186 | 91.81  | 4.50E-26 | 120d_4FG_120d_4CK |
| GO:0030312 | CC | external encapsulating structure            | 145  | 12  | 3.74   | 0.00031  | 0PG_0CK           |
| GO:0030312 | CC | external encapsulating structure            | 145  | 10  | 4.12   | 0.0078   | 120d_2PG_120d_2CK |
| GO:0019898 | CC | extrinsic component of membrane             | 16   | 11  | 2.73   | 6.30E-06 | 0FG_0CK           |
| GO:0019898 | CC | extrinsic component of membrane             | 16   | 11  | 2.3    | 1.10E-06 | 2FG_2CK           |
| GO:0019898 | CC | extrinsic component of membrane             | 16   | 11  | 2.04   | 3.20E-07 | 120d_4FG_120d_4CK |
| GO:0019898 | CC | extrinsic component of membrane             | 16   | 14  | 2.15   | 5.00E-11 | 120d_0FG_120d_0CK |
| GO:0019898 | CC | extrinsic component of membrane             | 16   | 11  | 1.69   | 4.40E-08 | 120d_2FG_120d_2CK |
| GO:0016021 | CC | integral component of membrane              | 837  | 53  | 33.32  | 0.00019  | 120d_0PG_120d_0CK |
| GO:0016021 | CC | integral component of membrane              | 837  | 137 | 112.41 | 0.00399  | 120d_0FG_120d_0CK |
| GO:0005622 | CC | intracellular                               | 2596 | 479 | 442.32 | 0.00197  | 0FG_0CK           |
| GO:0043232 | CC | intracellular non-membrane-bounded organ... | 528  | 159 | 89.96  | 1.40E-15 | 0FG_0CK           |
| GO:0043232 | CC | intracellular non-membrane-bounded organ... | 528  | 124 | 75.99  | 1.80E-09 | 2FG_2CK           |
| GO:0043232 | CC | intracellular non-membrane-bounded organ... | 528  | 139 | 67.33  | 1.10E-19 | 120d_4FG_120d_4CK |
| GO:0043229 | CC | intracellular organelle                     | 1450 | 281 | 247.06 | 0.00251  | 0FG_0CK           |
| GO:0043229 | CC | intracellular organelle                     | 1450 | 222 | 184.9  | 0.00029  | 120d_4FG_120d_4CK |
| GO:0044424 | CC | intracellular part                          | 1942 | 397 | 330.89 | 1.00E-07 | 0FG_0CK           |
| GO:0044424 | CC | intracellular part                          | 1942 | 325 | 279.49 | 6.70E-05 | 2FG_2CK           |
| GO:0044424 | CC | intracellular part                          | 1942 | 301 | 247.63 | 1.20E-06 | 120d_4FG_120d_4CK |
| GO:0031224 | CC | intrinsic component of membrane             | 877  | 54  | 34.91  | 0.00033  | 120d_0PG_120d_0CK |
| GO:0031224 | CC | intrinsic component of membrane             | 877  | 141 | 117.78 | 0.00688  | 120d_0FG_120d_0CK |
| GO:0032991 | CC | macromolecular complex                      | 994  | 245 | 169.36 | 2.20E-12 | 0FG_0CK           |
| GO:0032991 | CC | macromolecular complex                      | 994  | 205 | 143.06 | 6.70E-10 | 2FG_2CK           |
| GO:0032991 | CC | macromolecular complex                      | 994  | 214 | 126.75 | 4.50E-19 | 120d_4FG_120d_4CK |

|            |    |                                |      |     |        |          |                   |
|------------|----|--------------------------------|------|-----|--------|----------|-------------------|
| GO:0016020 | CC | membrane                       | 2087 | 106 | 83.08  | 0.00034  | 120d_0PG_120d_0CK |
| GO:0016020 | CC | membrane                       | 2087 | 339 | 280.28 | 2.10E-07 | 120d_0FG_120d_0CK |
| GO:0016020 | CC | membrane                       | 2087 | 74  | 59.34  | 0.0058   | 120d_2PG_120d_2CK |
| GO:0016020 | CC | membrane                       | 2087 | 261 | 220.48 | 5.70E-05 | 120d_2FG_120d_2CK |
| GO:0044425 | CC | membrane part                  | 1078 | 57  | 42.91  | 0.0091   | 120d_0PG_120d_0CK |
| GO:0044425 | CC | membrane part                  | 1078 | 186 | 144.77 | 2.40E-05 | 120d_0FG_120d_0CK |
| GO:0044425 | CC | membrane part                  | 1078 | 145 | 113.88 | 0.00034  | 120d_2FG_120d_2CK |
| GO:0005740 | CC | mitochondrial envelope         | 66   | 17  | 8.42   | 0.00296  | 120d_4FG_120d_4CK |
| GO:0031966 | CC | mitochondrial membrane         | 53   | 14  | 6.76   | 0.00528  | 120d_4FG_120d_4CK |
| GO:0044455 | CC | mitochondrial membrane part    | 21   | 8   | 2.68   | 0.00296  | 120d_4FG_120d_4CK |
| GO:0044429 | CC | mitochondrial part             | 74   | 19  | 9.44   | 0.00179  | 120d_4FG_120d_4CK |
| GO:0005739 | CC | mitochondrion                  | 84   | 22  | 10.71  | 0.0006   | 120d_4FG_120d_4CK |
| GO:0043228 | CC | non-membrane-bounded organelle | 528  | 159 | 89.96  | 1.40E-15 | 0FG_0CK           |
| GO:0043228 | CC | non-membrane-bounded organelle | 528  | 124 | 75.99  | 1.80E-09 | 2FG_2CK           |
| GO:0043228 | CC | non-membrane-bounded organelle | 528  | 139 | 67.33  | 1.10E-19 | 120d_4FG_120d_4CK |
| GO:0043226 | CC | organelle                      | 1450 | 281 | 247.06 | 0.00251  | 0FG_0CK           |
| GO:0043226 | CC | organelle                      | 1450 | 222 | 184.9  | 0.00029  | 120d_4FG_120d_4CK |
| GO:1990204 | CC | oxidoreductase complex         | 28   | 13  | 4.77   | 0.00028  | 0FG_0CK           |
| GO:1990204 | CC | oxidoreductase complex         | 28   | 16  | 4.03   | 1.60E-07 | 2FG_2CK           |
| GO:1990204 | CC | oxidoreductase complex         | 28   | 15  | 3.57   | 2.40E-07 | 120d_4FG_120d_4CK |
| GO:1990204 | CC | oxidoreductase complex         | 28   | 18  | 3.76   | 5.70E-10 | 120d_0FG_120d_0CK |
| GO:1990204 | CC | oxidoreductase complex         | 28   | 16  | 2.96   | 1.70E-09 | 120d_2FG_120d_2CK |
| GO:0034357 | CC | photosynthetic membrane        | 52   | 34  | 8.86   | 7.50E-15 | 0FG_0CK           |
| GO:0034357 | CC | photosynthetic membrane        | 52   | 5   | 0.61   | 0.00032  | 2PG_2CK           |
| GO:0034357 | CC | photosynthetic membrane        | 52   | 37  | 7.48   | 1.50E-20 | 2FG_2CK           |
| GO:0034357 | CC | photosynthetic membrane        | 52   | 34  | 6.63   | 7.40E-19 | 120d_4FG_120d_4CK |
| GO:0034357 | CC | photosynthetic membrane        | 52   | 36  | 6.98   | 2.00E-20 | 120d_0FG_120d_0CK |
| GO:0034357 | CC | photosynthetic membrane        | 52   | 33  | 5.49   | 2.50E-20 | 120d_2FG_120d_2CK |
| GO:0009521 | CC | photosystem                    | 49   | 32  | 8.35   | 5.00E-14 | 0FG_0CK           |
| GO:0009521 | CC | photosystem                    | 49   | 5   | 0.58   | 0.00024  | 2PG_2CK           |
| GO:0009521 | CC | photosystem                    | 49   | 35  | 7.05   | 1.40E-19 | 2FG_2CK           |
| GO:0009521 | CC | photosystem                    | 49   | 32  | 6.25   | 8.60E-18 | 120d_4FG_120d_4CK |
| GO:0009521 | CC | photosystem                    | 49   | 34  | 6.58   | 2.20E-19 | 120d_0FG_120d_0CK |
| GO:0009521 | CC | photosystem                    | 49   | 32  | 5.18   | 2.60E-20 | 120d_2FG_120d_2CK |
| GO:0009522 | CC | photosystem I                  | 16   | 12  | 2.73   | 5.20E-07 | 0FG_0CK           |
| GO:0009522 | CC | photosystem I                  | 16   | 3   | 0.19   | 0.00078  | 2PG_2CK           |
| GO:0009522 | CC | photosystem I                  | 16   | 13  | 2.3    | 3.80E-09 | 2FG_2CK           |
| GO:0009522 | CC | photosystem I                  | 16   | 10  | 2.04   | 4.10E-06 | 120d_4FG_120d_4CK |
| GO:0009522 | CC | photosystem I                  | 16   | 10  | 2.15   | 6.70E-06 | 120d_0FG_120d_0CK |
| GO:0009522 | CC | photosystem I                  | 16   | 10  | 1.69   | 7.00E-07 | 120d_2FG_120d_2CK |
| GO:0009523 | CC | photosystem II                 | 30   | 20  | 5.11   | 1.90E-09 | 0FG_0CK           |
| GO:0009523 | CC | photosystem II                 | 30   | 22  | 4.32   | 4.10E-13 | 2FG_2CK           |
| GO:0009523 | CC | photosystem II                 | 30   | 22  | 3.83   | 3.20E-14 | 120d_4FG_120d_4CK |
| GO:0009523 | CC | photosystem II                 | 30   | 24  | 4.03   | 2.10E-16 | 120d_0FG_120d_0CK |

|            |    |                                             |     |     |       |          |                   |
|------------|----|---------------------------------------------|-----|-----|-------|----------|-------------------|
| GO:0009523 | CC | photosystem II                              | 30  | 22  | 3.17  | 5.60E-16 | 120d_2FG_120d_2CK |
| GO:0009654 | CC | photosystem II oxygen evolving complex      | 20  | 12  | 3.41  | 1.80E-05 | 0FG_0CK           |
| GO:0009654 | CC | photosystem II oxygen evolving complex      | 20  | 14  | 2.88  | 2.40E-08 | 2FG_2CK           |
| GO:0009654 | CC | photosystem II oxygen evolving complex      | 20  | 14  | 2.55  | 4.80E-09 | 120d_4FG_120d_4CK |
| GO:0009654 | CC | photosystem II oxygen evolving complex      | 20  | 16  | 2.69  | 2.70E-11 | 120d_0FG_120d_0CK |
| GO:0009654 | CC | photosystem II oxygen evolving complex      | 20  | 14  | 2.11  | 3.80E-10 | 120d_2FG_120d_2CK |
| GO:0009536 | CC | plastid                                     | 30  | 18  | 5.11  | 1.40E-07 | 0FG_0CK           |
| GO:0009536 | CC | plastid                                     | 30  | 16  | 4.32  | 5.80E-07 | 2FG_2CK           |
| GO:0009536 | CC | plastid                                     | 30  | 11  | 3.83  | 0.00073  | 120d_4FG_120d_4CK |
| GO:0009536 | CC | plastid                                     | 30  | 5   | 1.19  | 0.00599  | 120d_0PG_120d_0CK |
| GO:0009536 | CC | plastid                                     | 30  | 16  | 4.03  | 2.20E-07 | 120d_0FG_120d_0CK |
| GO:0009536 | CC | plastid                                     | 30  | 4   | 0.85  | 0.0096   | 120d_2PG_120d_2CK |
| GO:0009536 | CC | plastid                                     | 30  | 13  | 3.17  | 3.80E-06 | 120d_2FG_120d_2CK |
| GO:0000502 | CC | proteasome complex                          | 33  | 16  | 4.43  | 1.20E-06 | 120d_0FG_120d_0CK |
| GO:0005839 | CC | proteasome core complex                     | 29  | 16  | 3.89  | 1.20E-07 | 120d_0FG_120d_0CK |
| GO:0005839 | CC | proteasome core complex                     | 29  | 8   | 3.06  | 0.00845  | 120d_2FG_120d_2CK |
| GO:0019773 | CC | proteasome core complex, alpha-subunit c... | 15  | 8   | 2.01  | 0.00027  | 120d_0FG_120d_0CK |
| GO:0045259 | CC | proton-transporting ATP synthase complex    | 23  | 10  | 2.93  | 0.00025  | 120d_4FG_120d_4CK |
| GO:0045261 | CC | proton-transporting ATP synthase complex... | 15  | 6   | 1.91  | 0.00758  | 120d_4FG_120d_4CK |
| GO:0016469 | CC | proton-transporting two-sector ATPase co... | 64  | 18  | 8.16  | 0.00075  | 120d_4FG_120d_4CK |
| GO:0030529 | CC | ribonucleoprotein complex                   | 366 | 141 | 62.36 | 6.60E-25 | 0FG_0CK           |
| GO:0030529 | CC | ribonucleoprotein complex                   | 366 | 113 | 52.67 | 2.20E-17 | 2FG_2CK           |
| GO:0030529 | CC | ribonucleoprotein complex                   | 366 | 132 | 46.67 | < 1e-30  | 120d_4FG_120d_4CK |
| GO:0044391 | CC | ribosomal subunit                           | 21  | 9   | 3.58  | 0.00484  | 0FG_0CK           |
| GO:0044391 | CC | ribosomal subunit                           | 21  | 8   | 3.02  | 0.0063   | 2FG_2CK           |
| GO:0005840 | CC | ribosome                                    | 342 | 140 | 58.27 | 6.50E-28 | 0FG_0CK           |
| GO:0005840 | CC | ribosome                                    | 342 | 111 | 49.22 | 6.20E-19 | 2FG_2CK           |
| GO:0005840 | CC | ribosome                                    | 342 | 131 | 43.61 | < 1e-30  | 120d_4FG_120d_4CK |
| GO:0009579 | CC | thylakoid                                   | 54  | 36  | 9.2   | 4.60E-16 | 0FG_0CK           |
| GO:0009579 | CC | thylakoid                                   | 54  | 5   | 0.64  | 0.00039  | 2PG_2CK           |
| GO:0009579 | CC | thylakoid                                   | 54  | 39  | 7.77  | 5.50E-22 | 2FG_2CK           |
| GO:0009579 | CC | thylakoid                                   | 54  | 36  | 6.89  | 2.50E-20 | 120d_4FG_120d_4CK |
| GO:0009579 | CC | thylakoid                                   | 54  | 38  | 7.25  | 6.80E-22 | 120d_0FG_120d_0CK |
| GO:0009579 | CC | thylakoid                                   | 54  | 35  | 5.7   | 5.90E-22 | 120d_2FG_120d_2CK |
| GO:0042651 | CC | thylakoid membrane                          | 24  | 15  | 4.09  | 7.50E-07 | 0FG_0CK           |
| GO:0042651 | CC | thylakoid membrane                          | 24  | 17  | 3.45  | 5.20E-10 | 2FG_2CK           |
| GO:0042651 | CC | thylakoid membrane                          | 24  | 17  | 3.06  | 7.30E-11 | 120d_4FG_120d_4CK |
| GO:0042651 | CC | thylakoid membrane                          | 24  | 19  | 3.22  | 4.70E-13 | 120d_0FG_120d_0CK |
| GO:0042651 | CC | thylakoid membrane                          | 24  | 16  | 2.54  | 6.30E-11 | 120d_2FG_120d_2CK |
| GO:0044436 | CC | thylakoid part                              | 54  | 36  | 9.2   | 4.60E-16 | 0FG_0CK           |
| GO:0044436 | CC | thylakoid part                              | 54  | 5   | 0.64  | 0.00039  | 2PG_2CK           |
| GO:0044436 | CC | thylakoid part                              | 54  | 39  | 7.77  | 5.50E-22 | 2FG_2CK           |
| GO:0044436 | CC | thylakoid part                              | 54  | 36  | 6.89  | 2.50E-20 | 120d_4FG_120d_4CK |

|            |    |                                             |     |    |       |          |                   |
|------------|----|---------------------------------------------|-----|----|-------|----------|-------------------|
| GO:0044436 | CC | thylakoid part                              | 54  | 38 | 7.25  | 6.80E-22 | 120d_0FG_120d_0CK |
| GO:0044436 | CC | thylakoid part                              | 54  | 35 | 5.7   | 5.90E-22 | 120d_2FG_120d_2CK |
| GO:0051537 | MF | 2 iron, 2 sulfur cluster binding            | 17  | 7  | 2.5   | 0.00737  | 0FG_0CK           |
| GO:0051537 | MF | 2 iron, 2 sulfur cluster binding            | 17  | 8  | 2.08  | 0.00043  | 2FG_2CK           |
| GO:0051537 | MF | 2 iron, 2 sulfur cluster binding            | 17  | 9  | 1.76  | 1.50E-05 | 120d_4FG_120d_4CK |
| GO:0051537 | MF | 2 iron, 2 sulfur cluster binding            | 17  | 6  | 1.69  | 0.00445  | 120d_2FG_120d_2CK |
| GO:0016832 | MF | aldehyde-lyase activity                     | 13  | 7  | 1.91  | 0.00111  | 0FG_0CK           |
| GO:0016832 | MF | aldehyde-lyase activity                     | 13  | 7  | 1.59  | 0.00035  | 2FG_2CK           |
| GO:0016832 | MF | aldehyde-lyase activity                     | 13  | 7  | 1.35  | 0.00012  | 120d_4FG_120d_4CK |
| GO:0016832 | MF | aldehyde-lyase activity                     | 13  | 4  | 0.55  | 0.00163  | 120d_0PG_120d_0CK |
| GO:0016832 | MF | aldehyde-lyase activity                     | 13  | 7  | 1.67  | 0.00048  | 120d_0FG_120d_0CK |
| GO:0016832 | MF | aldehyde-lyase activity                     | 13  | 7  | 1.29  | 9.30E-05 | 120d_2FG_120d_2CK |
| GO:0031420 | MF | alkali metal ion binding                    | 17  | 6  | 1.76  | 0.00558  | 120d_4FG_120d_4CK |
| GO:0031420 | MF | alkali metal ion binding                    | 17  | 6  | 1.69  | 0.00445  | 120d_2FG_120d_2CK |
| GO:0003905 | MF | alkylbase DNA N-glycosylase activity        | 10  | 3  | 0.29  | 0.00258  | 0PG_0CK           |
| GO:0016597 | MF | amino acid binding                          | 39  | 7  | 1.64  | 0.00106  | 120d_0PG_120d_0CK |
| GO:0016597 | MF | amino acid binding                          | 39  | 10 | 3.87  | 0.00388  | 120d_2FG_120d_2CK |
| GO:0004812 | MF | aminoacyl-tRNA ligase activity              | 59  | 18 | 8.67  | 0.0015   | 0FG_0CK           |
| GO:0004812 | MF | aminoacyl-tRNA ligase activity              | 59  | 17 | 7.2   | 0.00049  | 2FG_2CK           |
| GO:0016209 | MF | antioxidant activity                        | 160 | 14 | 6.72  | 0.00758  | 120d_0PG_120d_0CK |
| GO:0016887 | MF | ATPase activity                             | 360 | 62 | 46.19 | 0.00913  | 120d_0FG_120d_0CK |
| GO:0043492 | MF | ATPase activity, coupled to movement of ... | 97  | 24 | 14.26 | 0.00618  | 0FG_0CK           |
| GO:0043492 | MF | ATPase activity, coupled to movement of ... | 97  | 21 | 11.84 | 0.00601  | 2FG_2CK           |
| GO:0043492 | MF | ATPase activity, coupled to movement of ... | 97  | 22 | 12.45 | 0.00505  | 120d_0FG_120d_0CK |
| GO:0042626 | MF | ATPase activity, coupled to transmembran... | 97  | 24 | 14.26 | 0.00618  | 0FG_0CK           |
| GO:0042626 | MF | ATPase activity, coupled to transmembran... | 97  | 21 | 11.84 | 0.00601  | 2FG_2CK           |
| GO:0044769 | MF | ATPase activity, coupled to transmembran... | 28  | 8  | 2.91  | 0.00615  | 120d_4FG_120d_4CK |
| GO:0042626 | MF | ATPase activity, coupled to transmembran... | 97  | 22 | 12.45 | 0.00505  | 120d_0FG_120d_0CK |
| GO:0005509 | MF | calcium ion binding                         | 56  | 17 | 8.23  | 0.00213  | 0FG_0CK           |
| GO:0005509 | MF | calcium ion binding                         | 56  | 19 | 6.84  | 1.90E-05 | 2FG_2CK           |
| GO:0005509 | MF | calcium ion binding                         | 56  | 17 | 5.81  | 3.30E-05 | 120d_4FG_120d_4CK |
| GO:0005509 | MF | calcium ion binding                         | 56  | 18 | 7.19  | 0.00014  | 120d_0FG_120d_0CK |
| GO:0005509 | MF | calcium ion binding                         | 56  | 16 | 5.55  | 7.20E-05 | 120d_2FG_120d_2CK |
| GO:0019200 | MF | carbohydrate kinase activity                | 12  | 6  | 1.76  | 0.00417  | 0FG_0CK           |
| GO:0019200 | MF | carbohydrate kinase activity                | 12  | 5  | 1.25  | 0.00507  | 120d_4FG_120d_4CK |
| GO:0016830 | MF | carbon-carbon lyase activity                | 81  | 30 | 11.91 | 5.70E-07 | 0FG_0CK           |
| GO:0016830 | MF | carbon-carbon lyase activity                | 81  | 28 | 9.89  | 1.40E-07 | 2FG_2CK           |
| GO:0016830 | MF | carbon-carbon lyase activity                | 81  | 19 | 8.41  | 0.00051  | 120d_4FG_120d_4CK |
| GO:0016830 | MF | carbon-carbon lyase activity                | 81  | 25 | 10.39 | 1.70E-05 | 120d_0FG_120d_0CK |
| GO:0016830 | MF | carbon-carbon lyase activity                | 81  | 21 | 8.03  | 2.90E-05 | 120d_2FG_120d_2CK |
| GO:0016840 | MF | carbon-nitrogen lyase activity              | 22  | 7  | 2.28  | 0.00536  | 120d_4FG_120d_4CK |
| GO:0016840 | MF | carbon-nitrogen lyase activity              | 22  | 5  | 0.92  | 0.00187  | 120d_0PG_120d_0CK |
| GO:0031406 | MF | carboxylic acid binding                     | 39  | 7  | 1.64  | 0.00106  | 120d_0PG_120d_0CK |
| GO:0031406 | MF | carboxylic acid binding                     | 39  | 10 | 3.87  | 0.00388  | 120d_2FG_120d_2CK |



|            |    |                                             |      |      |         |          |                   |
|------------|----|---------------------------------------------|------|------|---------|----------|-------------------|
| GO:0016831 | MF | carboxy-lyase activity                      | 48   | 14   | 7.06    | 0.00751  | 0FG_0CK           |
| GO:0016831 | MF | carboxy-lyase activity                      | 48   | 13   | 5.86    | 0.00401  | 2FG_2CK           |
| GO:0003824 | MF | catalytic activity                          | 7941 | 1256 | 1167.48 | 3.10E-05 | 0FG_0CK           |
| GO:0003824 | MF | catalytic activity                          | 7941 | 109  | 92.02   | 0.0064   | 2PG_2CK           |
| GO:0003824 | MF | catalytic activity                          | 7941 | 1094 | 969.56  | 5.00E-10 | 2FG_2CK           |
| GO:0003824 | MF | catalytic activity                          | 7941 | 915  | 824.07  | 8.70E-07 | 120d_4FG_120d_4CK |
| GO:0003824 | MF | catalytic activity                          | 7941 | 406  | 333.64  | 3.30E-09 | 120d_0PG_120d_0CK |
| GO:0003824 | MF | catalytic activity                          | 7941 | 1211 | 1018.91 | 1.00E-20 | 120d_0FG_120d_0CK |
| GO:0003824 | MF | catalytic activity                          | 7941 | 249  | 218.48  | 0.00153  | 120d_2PG_120d_2CK |
| GO:0003824 | MF | catalytic activity                          | 7941 | 935  | 787.57  | 9.50E-16 | 120d_2FG_120d_2CK |
| GO:0043169 | MF | cation binding                              | 1895 | 36   | 21.96   | 0.0018   | 2PG_2CK           |
| GO:0043169 | MF | cation binding                              | 1895 | 248  | 187.94  | 1.20E-06 | 120d_2FG_120d_2CK |
| GO:0008324 | MF | cation transmembrane transporter activit... | 224  | 38   | 23.25   | 0.0016   | 120d_4FG_120d_4CK |
| GO:0019829 | MF | cation-transporting ATPase activity         | 28   | 8    | 2.91    | 0.00615  | 120d_4FG_120d_4CK |
| GO:0051087 | MF | chaperone binding                           | 20   | 6    | 0.59    | 1.70E-05 | 0PG_0CK           |
| GO:0008061 | MF | chitin binding                              | 12   | 2    | 0.14    | 0.0082   | 2PG_2CK           |
| GO:0050662 | MF | coenzyme binding                            | 298  | 61   | 43.81   | 0.004    | 0FG_0CK           |
| GO:0050662 | MF | coenzyme binding                            | 298  | 59   | 36.38   | 0.00011  | 2FG_2CK           |
| GO:0050662 | MF | coenzyme binding                            | 298  | 47   | 30.92   | 0.00233  | 120d_4FG_120d_4CK |
| GO:0050662 | MF | coenzyme binding                            | 298  | 59   | 38.24   | 0.00041  | 120d_0FG_120d_0CK |
| GO:0050662 | MF | coenzyme binding                            | 298  | 50   | 29.55   | 0.00014  | 120d_2FG_120d_2CK |
| GO:0048037 | MF | cofactor binding                            | 419  | 88   | 61.6    | 0.00027  | 0FG_0CK           |
| GO:0048037 | MF | cofactor binding                            | 419  | 85   | 51.16   | 1.30E-06 | 2FG_2CK           |
| GO:0048037 | MF | cofactor binding                            | 419  | 76   | 43.48   | 8.10E-07 | 120d_4FG_120d_4CK |
| GO:0048037 | MF | cofactor binding                            | 419  | 85   | 53.76   | 9.40E-06 | 120d_0FG_120d_0CK |
| GO:0048037 | MF | cofactor binding                            | 419  | 21   | 11.53   | 0.00618  | 120d_2PG_120d_2CK |
| GO:0048037 | MF | cofactor binding                            | 419  | 73   | 41.56   | 1.20E-06 | 120d_2FG_120d_2CK |
| GO:0004129 | MF | cytochrome-c oxidase activity               | 11   | 6    | 1.14    | 0.00036  | 120d_4FG_120d_4CK |
| GO:0051213 | MF | dioxygenase activity                        | 189  | 8    | 2.19    | 0.0016   | 2PG_2CK           |
| GO:0051213 | MF | dioxygenase activity                        | 189  | 12   | 5.2     | 0.00617  | 120d_2PG_120d_2CK |
| GO:0019104 | MF | DNA N-glycosylase activity                  | 12   | 3    | 0.35    | 0.00452  | 0PG_0CK           |
| GO:0009055 | MF | electron carrier activity                   | 522  | 15   | 6.05    | 0.0011   | 2PG_2CK           |
| GO:0009055 | MF | electron carrier activity                   | 522  | 83   | 54.17   | 4.80E-05 | 120d_4FG_120d_4CK |
| GO:0009055 | MF | electron carrier activity                   | 522  | 27   | 14.36   | 0.0013   | 120d_2PG_120d_2CK |
| GO:0009055 | MF | electron carrier activity                   | 522  | 88   | 51.77   | 4.10E-07 | 120d_2FG_120d_2CK |
| GO:0004332 | MF | fructose-bisphosphate aldolase activity     | 11   | 7    | 1.62    | 0.00028  | 0FG_0CK           |
| GO:0004332 | MF | fructose-bisphosphate aldolase activity     | 11   | 7    | 1.34    | 8.40E-05 | 2FG_2CK           |
| GO:0004332 | MF | fructose-bisphosphate aldolase activity     | 11   | 7    | 1.14    | 2.90E-05 | 120d_4FG_120d_4CK |
| GO:0004332 | MF | fructose-bisphosphate aldolase activity     | 11   | 4    | 0.46    | 0.0008   | 120d_0PG_120d_0CK |
| GO:0004332 | MF | fructose-bisphosphate aldolase activity     | 11   | 7    | 1.41    | 0.00012  | 120d_0FG_120d_0CK |
| GO:0004332 | MF | fructose-bisphosphate aldolase activity     | 11   | 7    | 1.09    | 2.10E-05 | 120d_2FG_120d_2CK |
| GO:0004372 | MF | glycine hydroxymethyltransferase activit... | 10   | 5    | 1.47    | 0.00903  | 0FG_0CK           |
| GO:0031072 | MF | heat shock protein binding                  | 128  | 28   | 15.63   | 0.00143  | 2FG_2CK           |
| GO:0020037 | MF | heme binding                                | 470  | 14   | 5.45    | 0.0012   | 2PG_2CK           |

|            |    |                                             |     |    |       |          |                   |
|------------|----|---------------------------------------------|-----|----|-------|----------|-------------------|
| GO:0020037 | MF | heme binding                                | 470 | 38 | 19.75 | 8.90E-05 | 120d_0PG_120d_0CK |
| GO:0020037 | MF | heme binding                                | 470 | 30 | 12.93 | 1.80E-05 | 120d_2PG_120d_2CK |
| GO:0020037 | MF | heme binding                                | 470 | 71 | 46.61 | 0.0002   | 120d_2FG_120d_2CK |
| GO:0015002 | MF | heme-copper terminal oxidase activity       | 11  | 6  | 1.14  | 0.00036  | 120d_4FG_120d_4CK |
| GO:0015078 | MF | hydrogen ion transmembrane transporter a... | 113 | 26 | 11.73 | 7.30E-05 | 120d_4FG_120d_4CK |
| GO:0016820 | MF | hydrolase activity, acting on acid anhyd... | 105 | 27 | 15.44 | 0.00214  | 0FG_0CK           |
| GO:0016820 | MF | hydrolase activity, acting on acid anhyd... | 105 | 23 | 12.82 | 0.00357  | 2FG_2CK           |
| GO:0016820 | MF | hydrolase activity, acting on acid anhyd... | 105 | 20 | 10.9  | 0.00527  | 120d_4FG_120d_4CK |
| GO:0016820 | MF | hydrolase activity, acting on acid anhyd... | 105 | 23 | 13.47 | 0.00658  | 120d_0FG_120d_0CK |
| GO:0016798 | MF | hydrolase activity, acting on glycosyl b... | 473 | 27 | 13.87 | 0.00078  | 0PG_0CK           |
| GO:0004553 | MF | hydrolase activity, hydrolyzing O-glycos... | 448 | 24 | 13.14 | 0.00343  | 0PG_0CK           |
| GO:0016836 | MF | hydro-lyase activity                        | 37  | 11 | 3.84  | 0.00097  | 120d_4FG_120d_4CK |
| GO:0016836 | MF | hydro-lyase activity                        | 37  | 7  | 1.55  | 0.00077  | 120d_0PG_120d_0CK |
| GO:0016836 | MF | hydro-lyase activity                        | 37  | 10 | 3.67  | 0.00255  | 120d_2FG_120d_2CK |
| GO:0042802 | MF | identical protein binding                   | 92  | 8  | 2.7   | 0.00558  | 0PG_0CK           |
| GO:0022890 | MF | inorganic cation transmembrane transport... | 198 | 37 | 20.55 | 0.00028  | 120d_4FG_120d_4CK |
| GO:0016860 | MF | intramolecular oxidoreductase activity      | 23  | 8  | 2.81  | 0.00438  | 2FG_2CK           |
| GO:0016860 | MF | intramolecular oxidoreductase activity      | 23  | 5  | 0.97  | 0.00231  | 120d_0PG_120d_0CK |
| GO:0016860 | MF | intramolecular oxidoreductase activity      | 23  | 8  | 2.95  | 0.00596  | 120d_0FG_120d_0CK |
| GO:0016861 | MF | intramolecular oxidoreductase activity, ... | 20  | 5  | 0.84  | 0.00118  | 120d_0PG_120d_0CK |
| GO:0016861 | MF | intramolecular oxidoreductase activity, ... | 20  | 7  | 2.57  | 0.0096   | 120d_0FG_120d_0CK |
| GO:0015075 | MF | ion transmembrane transporter activity      | 344 | 55 | 35.7  | 0.00075  | 120d_4FG_120d_4CK |
| GO:0005506 | MF | iron ion binding                            | 378 | 15 | 4.38  | 3.50E-05 | 2PG_2CK           |
| GO:0005506 | MF | iron ion binding                            | 378 | 64 | 46.15 | 0.004    | 2FG_2CK           |
| GO:0005506 | MF | iron ion binding                            | 378 | 66 | 39.23 | 1.50E-05 | 120d_4FG_120d_4CK |
| GO:0005506 | MF | iron ion binding                            | 378 | 32 | 15.88 | 0.00014  | 120d_0PG_120d_0CK |
| GO:0005506 | MF | iron ion binding                            | 378 | 68 | 48.5  | 0.00227  | 120d_0FG_120d_0CK |
| GO:0005506 | MF | iron ion binding                            | 378 | 27 | 10.4  | 6.30E-06 | 120d_2PG_120d_2CK |
| GO:0005506 | MF | iron ion binding                            | 378 | 78 | 37.49 | 2.30E-10 | 120d_2FG_120d_2CK |
| GO:0051536 | MF | iron-sulfur cluster binding                 | 80  | 21 | 11.76 | 0.00489  | 0FG_0CK           |
| GO:0051536 | MF | iron-sulfur cluster binding                 | 80  | 20 | 9.77  | 0.00122  | 2FG_2CK           |
| GO:0051536 | MF | iron-sulfur cluster binding                 | 80  | 21 | 8.3   | 4.70E-05 | 120d_4FG_120d_4CK |
| GO:0016853 | MF | isomerase activity                          | 146 | 40 | 21.46 | 4.80E-05 | 0FG_0CK           |
| GO:0016853 | MF | isomerase activity                          | 146 | 31 | 17.83 | 0.00137  | 2FG_2CK           |
| GO:0016853 | MF | isomerase activity                          | 146 | 15 | 6.13  | 0.00124  | 120d_0PG_120d_0CK |
| GO:0016853 | MF | isomerase activity                          | 146 | 32 | 18.73 | 0.00152  | 120d_0FG_120d_0CK |
| GO:0016874 | MF | ligase activity                             | 288 | 55 | 36.95 | 0.0015   | 120d_0FG_120d_0CK |
| GO:0016876 | MF | ligase activity, forming aminoacyl-tRNA ... | 61  | 18 | 8.97  | 0.00227  | 0FG_0CK           |
| GO:0016876 | MF | ligase activity, forming aminoacyl-tRNA ... | 61  | 17 | 7.45  | 0.00075  | 2FG_2CK           |
| GO:0016875 | MF | ligase activity, forming carbon-oxygen b... | 61  | 18 | 8.97  | 0.00227  | 0FG_0CK           |
| GO:0016875 | MF | ligase activity, forming carbon-oxygen b... | 61  | 17 | 7.45  | 0.00075  | 2FG_2CK           |
| GO:0016829 | MF | lyase activity                              | 223 | 52 | 32.79 | 0.00039  | 0FG_0CK           |
| GO:0016829 | MF | lyase activity                              | 223 | 53 | 27.23 | 1.10E-06 | 2FG_2CK           |
| GO:0016829 | MF | lyase activity                              | 223 | 42 | 23.14 | 9.50E-05 | 120d_4FG_120d_4CK |

|            |    |                                                |      |     |        |          |                   |
|------------|----|------------------------------------------------|------|-----|--------|----------|-------------------|
| GO:0016829 | MF | lyase activity                                 | 223  | 22  | 9.37   | 0.00018  | 120d_0PG_120d_0CK |
| GO:0016829 | MF | lyase activity                                 | 223  | 46  | 28.61  | 0.00068  | 120d_0FG_120d_0CK |
| GO:0016829 | MF | lyase activity                                 | 223  | 14  | 6.14   | 0.00357  | 120d_2PG_120d_2CK |
| GO:0016829 | MF | lyase activity                                 | 223  | 43  | 22.12  | 1.50E-05 | 120d_2FG_120d_2CK |
| GO:0051540 | MF | metal cluster binding                          | 80   | 21  | 11.76  | 0.00489  | 0FG_0CK           |
| GO:0051540 | MF | metal cluster binding                          | 80   | 20  | 9.77   | 0.00122  | 2FG_2CK           |
| GO:0051540 | MF | metal cluster binding                          | 80   | 21  | 8.3    | 4.70E-05 | 120d_4FG_120d_4CK |
| GO:0046872 | MF | metal ion binding                              | 1884 | 36  | 21.83  | 0.0016   | 2PG_2CK           |
| GO:0046872 | MF | metal ion binding                              | 1884 | 246 | 186.85 | 1.60E-06 | 120d_2FG_120d_2CK |
| GO:0015077 | MF | monovalent inorganic cation<br>transmembran... | 161  | 32  | 16.71  | 0.00023  | 120d_4FG_120d_4CK |
| GO:0051287 | MF | NAD binding                                    | 43   | 13  | 6.32   | 0.00709  | 0FG_0CK           |
| GO:0051287 | MF | NAD binding                                    | 43   | 15  | 5.25   | 0.0001   | 2FG_2CK           |
| GO:0051287 | MF | NAD binding                                    | 43   | 13  | 4.46   | 0.00028  | 120d_4FG_120d_4CK |
| GO:0051287 | MF | NAD binding                                    | 43   | 13  | 4.26   | 0.00018  | 120d_2FG_120d_2CK |
| GO:0004576 | MF | oligosaccharyl transferase activity            | 12   | 6   | 1.47   | 0.00158  | 2FG_2CK           |
| GO:0043177 | MF | organic acid binding                           | 39   | 7   | 1.64   | 0.00106  | 120d_0PG_120d_0CK |
| GO:0043177 | MF | organic acid binding                           | 39   | 10  | 3.87   | 0.00388  | 120d_2FG_120d_2CK |
| GO:0016491 | MF | oxidoreductase activity                        | 1615 | 308 | 237.44 | 2.30E-07 | 0FG_0CK           |
| GO:0016491 | MF | oxidoreductase activity                        | 1615 | 40  | 18.71  | 2.50E-06 | 2PG_2CK           |
| GO:0016491 | MF | oxidoreductase activity                        | 1615 | 288 | 197.18 | 2.40E-12 | 2FG_2CK           |
| GO:0016491 | MF | oxidoreductase activity                        | 1615 | 287 | 167.6  | 7.60E-22 | 120d_4FG_120d_4CK |
| GO:0016491 | MF | oxidoreductase activity                        | 1615 | 112 | 67.85  | 5.00E-08 | 120d_0PG_120d_0CK |
| GO:0016491 | MF | oxidoreductase activity                        | 1615 | 305 | 207.22 | 1.60E-13 | 120d_0FG_120d_0CK |
| GO:0016491 | MF | oxidoreductase activity                        | 1615 | 79  | 44.43  | 2.40E-07 | 120d_2PG_120d_2CK |
| GO:0016491 | MF | oxidoreductase activity                        | 1615 | 275 | 160.17 | 4.60E-21 | 120d_2FG_120d_2CK |
| GO:0016675 | MF | oxidoreductase activity, acting on a hem...    | 11   | 6   | 1.14   | 0.00036  | 120d_4FG_120d_4CK |
| GO:0016676 | MF | oxidoreductase activity, acting on a hem...    | 11   | 6   | 1.14   | 0.00036  | 120d_4FG_120d_4CK |
| GO:0016614 | MF | oxidoreductase activity, acting on CH-OH...    | 155  | 40  | 22.79  | 0.0002   | 0FG_0CK           |
| GO:0016614 | MF | oxidoreductase activity, acting on CH-OH...    | 155  | 31  | 18.92  | 0.00364  | 2FG_2CK           |
| GO:0016614 | MF | oxidoreductase activity, acting on CH-OH...    | 155  | 37  | 16.09  | 9.40E-07 | 120d_4FG_120d_4CK |
| GO:0016614 | MF | oxidoreductase activity, acting on CH-OH...    | 155  | 14  | 6.51   | 0.00576  | 120d_0PG_120d_0CK |
| GO:0016614 | MF | oxidoreductase activity, acting on CH-OH...    | 155  | 37  | 19.89  | 0.00011  | 120d_0FG_120d_0CK |
| GO:0016614 | MF | oxidoreductase activity, acting on CH-OH...    | 155  | 11  | 4.26   | 0.00376  | 120d_2PG_120d_2CK |
| GO:0016614 | MF | oxidoreductase activity, acting on CH-OH...    | 155  | 37  | 15.37  | 3.10E-07 | 120d_2FG_120d_2CK |
| GO:0016679 | MF | oxidoreductase activity, acting on diphe...    | 12   | 5   | 1.25   | 0.00507  | 120d_4FG_120d_4CK |
| GO:0016705 | MF | oxidoreductase activity, acting on paire...    | 517  | 18  | 5.99   | 3.20E-05 | 2PG_2CK           |
| GO:0016706 | MF | oxidoreductase activity, acting on paire...    | 156  | 6   | 1.81   | 0.0097   | 2PG_2CK           |
| GO:0016705 | MF | oxidoreductase activity, acting on paire...    | 517  | 72  | 53.65  | 0.00576  | 120d_4FG_120d_4CK |
| GO:0016705 | MF | oxidoreductase activity, acting on paire...    | 517  | 36  | 21.72  | 0.00211  | 120d_0PG_120d_0CK |
| GO:0016717 | MF | oxidoreductase activity, acting on paire...    | 15   | 6   | 1.92   | 0.00789  | 120d_0FG_120d_0CK |
| GO:0016705 | MF | oxidoreductase activity, acting on paire...    | 517  | 35  | 14.22  | 9.10E-07 | 120d_2PG_120d_2CK |
| GO:0016705 | MF | oxidoreductase activity, acting on paire...    | 517  | 82  | 51.27  | 1.20E-05 | 120d_2FG_120d_2CK |
| GO:0016717 | MF | oxidoreductase activity, acting on paire...    | 15   | 7   | 1.49   | 0.00029  | 120d_2FG_120d_2CK |

|            |    |                                                |     |     |       |          |                   |
|------------|----|------------------------------------------------|-----|-----|-------|----------|-------------------|
| GO:0016701 | MF | oxidoreductase activity, acting on singl...    | 44  | 12  | 5.37  | 0.00527  | 2FG_2CK           |
| GO:0016701 | MF | oxidoreductase activity, acting on singl...    | 44  | 12  | 4.57  | 0.00134  | 120d_4FG_120d_4CK |
| GO:0016701 | MF | oxidoreductase activity, acting on singl...    | 44  | 12  | 5.65  | 0.00783  | 120d_0FG_120d_0CK |
| GO:0016701 | MF | oxidoreductase activity, acting on singl...    | 44  | 13  | 4.36  | 0.00023  | 120d_2FG_120d_2CK |
| GO:0016620 | MF | oxidoreductase activity, acting on the a...    | 30  | 11  | 4.41  | 0.00248  | 0FG_0CK           |
| GO:0016903 | MF | oxidoreductase activity, acting on the a...    | 44  | 14  | 6.47  | 0.00316  | 0FG_0CK           |
| GO:0016620 | MF | oxidoreductase activity, acting on the a...    | 30  | 9   | 3.11  | 0.00258  | 120d_4FG_120d_4CK |
| GO:0016903 | MF | oxidoreductase activity, acting on the a...    | 44  | 13  | 4.57  | 0.00037  | 120d_4FG_120d_4CK |
| GO:0016620 | MF | oxidoreductase activity, acting on the a...    | 30  | 8   | 2.98  | 0.00735  | 120d_2FG_120d_2CK |
| GO:0016903 | MF | oxidoreductase activity, acting on the a...    | 44  | 11  | 4.36  | 0.0031   | 120d_2FG_120d_2CK |
| GO:0016616 | MF | oxidoreductase activity, acting on the C...    | 141 | 39  | 20.73 | 4.70E-05 | 0FG_0CK           |
| GO:0016616 | MF | oxidoreductase activity, acting on the C...    | 141 | 30  | 17.22 | 0.00157  | 2FG_2CK           |
| GO:0016616 | MF | oxidoreductase activity, acting on the C...    | 141 | 34  | 14.63 | 2.00E-06 | 120d_4FG_120d_4CK |
| GO:0016616 | MF | oxidoreductase activity, acting on the C...    | 141 | 14  | 5.92  | 0.00246  | 120d_0PG_120d_0CK |
| GO:0016616 | MF | oxidoreductase activity, acting on the C...    | 141 | 34  | 18.09 | 0.00017  | 120d_0FG_120d_0CK |
| GO:0016616 | MF | oxidoreductase activity, acting on the C...    | 141 | 11  | 3.88  | 0.0018   | 120d_2PG_120d_2CK |
| GO:0016616 | MF | oxidoreductase activity, acting on the C...    | 141 | 35  | 13.98 | 2.30E-07 | 120d_2FG_120d_2CK |
| GO:0016638 | MF | oxidoreductase activity, acting on the C...    | 18  | 6   | 1.79  | 0.00613  | 120d_2FG_120d_2CK |
| GO:0008443 | MF | phosphofructokinase activity                   | 12  | 6   | 1.76  | 0.00417  | 0FG_0CK           |
| GO:0008443 | MF | phosphofructokinase activity                   | 12  | 5   | 1.25  | 0.00507  | 120d_4FG_120d_4CK |
| GO:0030955 | MF | potassium ion binding                          | 17  | 6   | 1.76  | 0.00558  | 120d_4FG_120d_4CK |
| GO:0030955 | MF | potassium ion binding                          | 17  | 6   | 1.69  | 0.00445  | 120d_2FG_120d_2CK |
| GO:0015405 | MF | P-P-bond-hydrolysis-driven<br>transmembrane... | 115 | 28  | 16.91 | 0.00418  | 0FG_0CK           |
| GO:0015399 | MF | primary active transmembrane transporter...    | 115 | 28  | 16.91 | 0.00418  | 0FG_0CK           |
| GO:0046933 | MF | proton-transporting ATP synthase activit...    | 22  | 8   | 2.28  | 0.00111  | 120d_4FG_120d_4CK |
| GO:0030170 | MF | pyridoxal phosphate binding                    | 93  | 23  | 13.67 | 0.00729  | 0FG_0CK           |
| GO:0030170 | MF | pyridoxal phosphate binding                    | 93  | 20  | 11.35 | 0.0078   | 2FG_2CK           |
| GO:0030170 | MF | pyridoxal phosphate binding                    | 93  | 20  | 9.65  | 0.00118  | 120d_4FG_120d_4CK |
| GO:0030170 | MF | pyridoxal phosphate binding                    | 93  | 21  | 11.93 | 0.00639  | 120d_0FG_120d_0CK |
| GO:0030170 | MF | pyridoxal phosphate binding                    | 93  | 17  | 9.22  | 0.00941  | 120d_2FG_120d_2CK |
| GO:0004743 | MF | pyruvate kinase activity                       | 17  | 6   | 1.76  | 0.00558  | 120d_4FG_120d_4CK |
| GO:0004743 | MF | pyruvate kinase activity                       | 17  | 6   | 1.69  | 0.00445  | 120d_2FG_120d_2CK |
| GO:0019843 | MF | rRNA binding                                   | 14  | 7   | 2.06  | 0.00195  | 0FG_0CK           |
| GO:0004252 | MF | serine-type endopeptidase activity             | 126 | 10  | 3.7   | 0.00397  | 0PG_0CK           |
| GO:0003735 | MF | structural constituent of ribosome             | 342 | 140 | 50.28 | < 1e-30  | 0FG_0CK           |
| GO:0003735 | MF | structural constituent of ribosome             | 342 | 111 | 41.76 | 2.20E-23 | 2FG_2CK           |
| GO:0003735 | MF | structural constituent of ribosome             | 342 | 131 | 35.49 | < 1e-30  | 120d_4FG_120d_4CK |
| GO:0005198 | MF | structural molecule activity                   | 392 | 156 | 57.63 | < 1e-30  | 0FG_0CK           |
| GO:0005198 | MF | structural molecule activity                   | 392 | 122 | 47.86 | 8.40E-24 | 2FG_2CK           |
| GO:0005198 | MF | structural molecule activity                   | 392 | 137 | 40.68 | < 1e-30  | 120d_4FG_120d_4CK |
| GO:0022891 | MF | substrate-specific transmembrane transpo...    | 362 | 57  | 37.57 | 0.00089  | 120d_4FG_120d_4CK |
| GO:0046906 | MF | tetrapyrrole binding                           | 473 | 14  | 5.48  | 0.0012   | 2PG_2CK           |
| GO:0046906 | MF | tetrapyrrole binding                           | 473 | 38  | 19.87 | 0.0001   | 120d_0PG_120d_0CK |

|            |    |                                             |      |     |        |          |                   |
|------------|----|---------------------------------------------|------|-----|--------|----------|-------------------|
| GO:0046906 | MF | tetrapyrrole binding                        | 473  | 30  | 13.01  | 2.00E-05 | 120d_2PG_120d_2CK |
| GO:0046906 | MF | tetrapyrrole binding                        | 473  | 71  | 46.91  | 0.00025  | 120d_2FG_120d_2CK |
| GO:0004298 | MF | threonine-type endopeptidase activity       | 29   | 16  | 3.72   | 6.60E-08 | 120d_0FG_120d_0CK |
| GO:0004298 | MF | threonine-type endopeptidase activity       | 29   | 8   | 2.88   | 0.00589  | 120d_2FG_120d_2CK |
| GO:0070003 | MF | threonine-type peptidase activity           | 29   | 16  | 3.72   | 6.60E-08 | 120d_0FG_120d_0CK |
| GO:0070003 | MF | threonine-type peptidase activity           | 29   | 8   | 2.88   | 0.00589  | 120d_2FG_120d_2CK |
| GO:0046912 | MF | transferase activity, transferring acyl ... | 11   | 6   | 1.34   | 0.00088  | 2FG_2CK           |
| GO:0046912 | MF | transferase activity, transferring acyl ... | 11   | 6   | 1.14   | 0.00036  | 120d_4FG_120d_4CK |
| GO:0016746 | MF | transferase activity, transferring acyl ... | 272  | 49  | 34.9   | 0.00838  | 120d_0FG_120d_0CK |
| GO:0016758 | MF | transferase activity, transferring hexos... | 345  | 58  | 42.12  | 0.00689  | 2FG_2CK           |
| GO:0016769 | MF | transferase activity, transferring nitro... | 47   | 12  | 5.74   | 0.00924  | 2FG_2CK           |
| GO:0016769 | MF | transferase activity, transferring nitro... | 47   | 11  | 4.88   | 0.00749  | 120d_4FG_120d_4CK |
| GO:0046914 | MF | transition metal ion binding                | 1509 | 28  | 17.49  | 0.0084   | 2PG_2CK           |
| GO:0046914 | MF | transition metal ion binding                | 1509 | 182 | 149.66 | 0.00239  | 120d_2FG_120d_2CK |
| GO:0022857 | MF | transmembrane transporter activity          | 586  | 87  | 60.81  | 0.00036  | 120d_4FG_120d_4CK |
| GO:0005215 | MF | transporter activity                        | 811  | 122 | 84.16  | 1.30E-05 | 120d_4FG_120d_4CK |
| GO:0005215 | MF | transporter activity                        | 811  | 53  | 34.07  | 0.00092  | 120d_0PG_120d_0CK |
| GO:0005215 | MF | transporter activity                        | 811  | 38  | 22.31  | 0.00096  | 120d_2PG_120d_2CK |

**Note:** "CK" indicates control, "PG" indicates partial girdled, and "FG" indicates fully girdled. "0" indicates 0hr, "2" indicates 2hr and "4" indicates 4hr. "120d" indicates 120-day old leaf, others not labeled with days came from 45-day old leaf.

**Supplemental Table S4. Genes annotated to photosynthesis, N-metabolism and tetrapyrrole synthesis pathways. The extent of differential expression is measured in terms of log2 fold change of treatment vs. control.**

| Table Class    | Cassava ID           | Mapman Category                                                       | Short Description                                          | PG0     | FG0   | PG2   | FG2   | PG4   | FG4   | PG0    | FG0   | PG2   | FG2   |
|----------------|----------------------|-----------------------------------------------------------------------|------------------------------------------------------------|---------|-------|-------|-------|-------|-------|--------|-------|-------|-------|
|                |                      |                                                                       |                                                            | 120 day |       |       |       |       |       | 45 day |       |       |       |
| Light Reaction | cassava4.1_028060m.g | PS.lightreaction.ATP synthase                                         | ATP synthase subunit alpha                                 | -1.78   | -1.02 | -0.94 | -0.45 | -0.15 | -2.65 | 0.55   | -2.27 | -0.45 | -1.77 |
|                | cassava4.1_014114m.g | PS.lightreaction.photosystem I.LHC-I                                  | photosystem I light harvesting complex gene 6              | -1.41   | -2.41 | -0.81 | -1.83 | -0.09 | -1.89 | -0.91  | -2.00 | -0.72 | -1.93 |
|                | cassava4.1_013714m.g | PS.lightreaction.photosystem II.LHC-II                                | light harvesting complex photosystem II                    | -1.33   | -3.17 | -0.60 | -3.56 | -0.13 | -4.56 | -0.92  | -3.18 | -1.20 | -3.90 |
|                | cassava4.1_010721m.g | PS.lightreaction.cyclic electron flow-chlororespiration               | NDH-dependent cyclic electron flow 1                       | -1.29   | -4.78 | -0.91 | -4.45 | 0.05  | -3.55 | -0.68  | -2.43 | -0.48 | -2.17 |
|                | cassava4.1_017367m.g | PS.lightreaction.photosystem II.PSII polypeptide subunits             | photosystem II reaction center PSB28 protein               | -1.29   | -2.65 | -0.95 | -2.18 | -0.36 | -1.30 | -0.75  | -1.84 | -0.68 | -1.77 |
|                | cassava4.1_015252m.g | PS.lightreaction.photosystem II.PSII polypeptide subunits             | PsbP-like protein 2                                        | -1.18   | -2.58 | -0.83 | -2.64 | -0.07 | -2.42 | -0.56  | -1.56 | -0.54 | -1.78 |
|                | cassava4.1_013294m.g | PS.lightreaction.photosystem II.LHC-II                                | light harvesting complex photosystem II                    | -1.04   | -3.86 | 0.06  | -3.04 | 0.09  | -2.67 | -0.72  | -2.45 | -0.42 | -2.60 |
|                | cassava4.1_015152m.g | PS.lightreaction.photosystem II.PSII polypeptide subunits             | PsbP-like protein 1                                        | -1.03   | -2.97 | -0.53 | -2.28 | -0.39 | -2.95 | -0.51  | -2.61 | -0.63 | -2.41 |
|                | cassava4.1_010832m.g | PS.lightreaction.other electron carrier (ox/red).ferredoxin reductase | ferredoxin-NADP(+)-oxidoreductase 2                        | -1.03   | -3.21 | -0.65 | -2.64 | -0.17 | -3.00 | -0.90  | -2.69 | -1.14 | -3.44 |
|                | cassava4.1_017708m.g | PS.lightreaction.photosystem I.PSI polypeptide subunits               | photosystem I P subunit                                    | -1.02   | -4.00 | -0.37 | -3.02 | -0.09 | -4.06 | -0.65  | -3.38 | -1.15 | -3.80 |
|                | cassava4.1_012195m.g | PS.lightreaction.photosystem I.LHC-I                                  | light-harvesting chlorophyll-protein complex I subunit A4  | -0.99   | -3.74 | -0.06 | -2.20 | 0.14  | -1.97 | -0.52  | -1.79 | -0.33 | -1.93 |
|                | cassava4.1_012460m.g | PS.lightreaction.photosystem II.LHC-II                                | light-harvesting chlorophyll-protein complex II subunit B1 | -0.97   | -5.16 | 0.09  | -2.62 | 0.07  | -2.03 | -0.93  | -1.94 | -0.32 | -1.94 |
|                | cassava4.1_019328m.g | PS.lightreaction.photosystem II.PSII polypeptide subunits             | photosystem II subunit X                                   | -0.97   | -3.65 | -0.72 | -3.15 | 0.03  | -2.36 | -0.27  | -2.53 | -0.72 | -2.38 |
|                | cassava4.1_011470m.g | PS.lightreaction.photosystem II.PSII polypeptide subunits             | photosystem II subunit O-2                                 | -0.88   | -3.07 | -0.29 | -2.54 | 0.00  | -2.59 | -0.66  | -2.56 | -0.75 | -2.74 |
|                | cassava4.1_011539m.g | PS.lightreaction.photosystem II.PSII polypeptide                      | photosystem II subunit O-2                                 | -0.88   | -2.69 | -0.27 | -2.54 | -0.06 | -2.76 | -0.64  | -2.32 | -0.91 | -2.99 |

|                      | subunits                                                                 |                                                                              |       |       |       |       |       |       |       |       |       |       |
|----------------------|--------------------------------------------------------------------------|------------------------------------------------------------------------------|-------|-------|-------|-------|-------|-------|-------|-------|-------|-------|
| cassava4.1_014055m.g | PS.lightreaction.photosystem II.LHC-II                                   | photosystem II light harvesting complex gene 2.1                             | -0.86 | -3.85 | -0.32 | -2.62 | -0.08 | -2.74 | -0.76 | -2.36 | -0.84 | -2.42 |
| cassava4.1_009836m.g | PS.lightreaction.ATP synthase.gamma chain                                | ATPase, F1 complex, gamma subunit protein                                    | -0.85 | -2.26 | -0.75 | -2.61 | -0.24 | -2.50 | -0.66 | -2.37 | -1.08 | -2.93 |
| cassava4.1_017705m.g | PS.lightreaction.other electron carrier<br>(ox/red).plastocyanin         | Cupredoxin superfamily protein                                               | -0.85 | -3.18 | -0.50 | -2.90 | -0.09 | -2.35 | -0.81 | -2.15 | -1.10 | -2.72 |
| cassava4.1_018500m.g | PS.lightreaction.other electron carrier<br>(ox/red).ferredoxin           | 2Fe-2S ferredoxin-like superfamily protein                                   | -0.84 | -4.02 | -0.99 | -3.76 | 0.06  | -2.71 | -0.39 | -3.14 | -1.00 | -3.32 |
| cassava4.1_013980m.g | PS.lightreaction.photosystem I.LHC-I                                     | photosystem I light harvesting complex gene 5                                | -0.84 | -2.47 | -0.39 | -2.20 | 0.11  | -1.98 | -0.38 | -1.04 | -0.25 | -0.79 |
| cassava4.1_015521m.g | PS.lightreaction.photosystem II.PSII polypeptide<br>subunits             | photosystem II subunit Q-2                                                   | -0.84 | -2.62 | -0.16 | -2.82 | -0.01 | -3.03 | -0.64 | -2.29 | -0.77 | -2.74 |
| cassava4.1_017374m.g | PS.lightreaction.photosystem I.PSI polypeptide subunits                  | photosystem I P subunit                                                      | -0.83 | -2.49 | -0.24 | -2.92 | -0.01 | -3.17 | -0.40 | -2.42 | -0.72 | -2.90 |
| cassava4.1_030348m.g | PS.lightreaction.photosystem I.PSI polypeptide subunits                  | photosystem I subunit I                                                      | -0.83 | -2.98 | -0.11 | -2.59 | 0.00  | -2.57 | -0.66 | -2.33 | -0.90 | -2.72 |
| cassava4.1_014559m.g | PS.lightreaction.photosystem I.LHC-I                                     | light-harvesting chlorophyll-protein complex I subunit A4                    | -0.81 | -3.94 | -0.03 | -2.65 | 0.04  | -2.03 | -0.20 | -1.54 | -0.28 | -2.01 |
| cassava4.1_018914m.g | PS.lightreaction.photosystem II.PSII polypeptide<br>subunits             | photosystem II reaction center W                                             | -0.81 | -2.88 | -0.93 | -2.71 | 0.01  | -2.24 | -0.34 | -1.80 | -0.66 | -2.34 |
| cassava4.1_014926m.g | PS.lightreaction.photosystem I.LHC-I                                     | photosystem I light harvesting complex gene 1                                | -0.81 | -3.93 | 0.03  | -2.55 | -0.01 | -1.91 | -0.53 | -1.94 | -0.10 | -1.74 |
| cassava4.1_017909m.g | PS.lightreaction.NADH DH                                                 | NAD(P)H:plastoquinone dehydrogenase complex subunit<br>O                     | -0.80 | -1.58 | -0.39 | -0.74 | 0.02  | -0.72 | -0.49 | -0.92 | -0.39 | -0.57 |
| cassava4.1_019060m.g | PS.lightreaction.photosystem I.PSI polypeptide subunits                  | photosystem I subunit K                                                      | -0.79 | -3.38 | -0.48 | -3.14 | 0.02  | -3.22 | -0.60 | -2.42 | -1.17 | -3.22 |
| cassava4.1_010341m.g | PS.lightreaction.other electron carrier<br>(ox/red).ferredoxin reductase | ferredoxin-NADP(+)-oxidoreductase 2                                          | -0.78 | -3.02 | -0.77 | -3.76 | -0.13 | -3.37 | -0.45 | -2.29 | -1.05 | -3.53 |
| cassava4.1_017061m.g | PS.lightreaction.NADH DH                                                 | inorganic carbon transport protein-related                                   | -0.77 | -2.42 | -0.73 | -2.59 | -0.24 | -3.31 | -0.57 | -1.62 | -0.92 | -2.36 |
| cassava4.1_010324m.g | PS.lightreaction.other electron carrier<br>(ox/red).ferredoxin reductase | ferredoxin-NADP(+)-oxidoreductase 1                                          | -0.77 | -2.08 | -0.39 | -2.19 | 0.03  | -2.08 | -0.50 | -1.85 | -0.81 | -2.51 |
| cassava4.1_017065m.g | PS.lightreaction.photosystem II.PSII polypeptide<br>subunits             | PsbQ-like 2                                                                  | -0.76 | -2.18 | -0.80 | -3.17 | 0.09  | -2.78 | -0.42 | -1.44 | -0.76 | -2.22 |
| cassava4.1_014170m.g | PS.lightreaction.photosystem II.PSII polypeptide<br>subunits             | Mog1/PsbP/DUF1795-like photosystem II reaction center<br>PsbP family protein | -0.75 | -1.19 | -0.24 | -0.96 | 0.01  | -1.61 | -0.33 | -0.96 | -0.07 | -0.84 |

|                      |                                                           |                                                                                             |       |       |       |       |       |       |       |       |       |       |
|----------------------|-----------------------------------------------------------|---------------------------------------------------------------------------------------------|-------|-------|-------|-------|-------|-------|-------|-------|-------|-------|
| cassava4.1_017073m.g | PS.lightreaction.photosystem I.LHC-I                      | one-helix protein 2                                                                         | -0.75 | -1.47 | -0.15 | -1.45 | -0.07 | -1.04 | -0.32 | -1.70 | -0.92 | -2.52 |
| cassava4.1_012896m.g | PS.lightreaction.photosystem II.PSII polypeptide subunits | Mog1/PsbP/DUF1795-like photosystem II reaction center PsbP family protein                   | -0.75 | -1.60 | -0.35 | -0.67 | -0.27 | -0.66 | -0.80 | -0.49 | 0.08  | 0.28  |
| cassava4.1_015488m.g | PS.lightreaction.cytochrome b6/f.iron sulfur subunit      | photosynthetic electron transfer C                                                          | -0.74 | -2.03 | -0.42 | -1.72 | -0.05 | -1.83 | -0.77 | -1.98 | -0.88 | -2.24 |
| cassava4.1_019108m.g | PS.lightreaction.photosystem I.PSI polypeptide subunits   | photosystem I subunit K                                                                     | -0.73 | -3.55 | -0.17 | -3.16 | 0.04  | -3.16 | -0.60 | -2.27 | -1.22 | -3.25 |
| cassava4.1_015604m.g | PS.lightreaction.photosystem II.PSII polypeptide subunits | PsbQ-like 1                                                                                 | -0.73 | -1.80 | -0.87 | -1.94 | 0.09  | -1.48 | -0.56 | 0.56  | -0.09 | 0.63  |
| cassava4.1_014868m.g | PS.lightreaction.ATP synthase.delta chain                 | ATP synthase delta-subunit gene                                                             | -0.72 | -2.38 | -0.55 | -1.95 | -0.08 | -1.92 | -0.73 | -2.01 | -0.95 | -2.54 |
| cassava4.1_015015m.g | PS.lightreaction.photosystem II.PSII polypeptide subunits | PsbP-like protein 1                                                                         | -0.71 | -1.85 | -0.63 | -1.60 | 0.11  | -1.79 | -0.38 | -1.27 | -0.53 | -1.33 |
| cassava4.1_014216m.g | PS.lightreaction.photosystem II.PSII polypeptide subunits | photosystem II subunit P-1                                                                  | -0.70 | -2.03 | -0.08 | -2.04 | 0.01  | -2.75 | -0.73 | -2.05 | -0.78 | -2.51 |
| cassava4.1_014117m.g | PS.lightreaction.photosystem II.LHC-II                    | light-harvesting chlorophyll B-binding protein 3                                            | -0.69 | -4.02 | -0.11 | -2.35 | 0.06  | -2.03 | -0.74 | -1.83 | -0.47 | -2.33 |
| cassava4.1_015490m.g | PS.lightreaction.photosystem I.PSI polypeptide subunits   | photosystem I subunit F                                                                     | -0.68 | -2.28 | -0.21 | -2.40 | 0.07  | -2.45 | -0.67 | -2.13 | -0.86 | -2.55 |
| cassava4.1_008115m.g | PS.lightreaction.NADH DH                                  | unknow                                                                                      | -0.68 | -0.63 | -0.13 | -0.57 | -0.09 | -1.03 | -0.04 | 0.10  | -0.02 | -0.23 |
| cassava4.1_014906m.g | PS.lightreaction.photosystem I.LHC-I                      | photosystem I light harvesting complex gene 1                                               | -0.68 | -3.19 | -0.13 | -2.28 | -0.08 | -1.34 | -0.42 | -1.60 | -0.53 | -2.08 |
| cassava4.1_014115m.g | PS.lightreaction.ATP synthase.subunit B_ (ATPX)           | ATPase, F0 complex, subunit B/B', bacterial/chloroplast                                     | -0.67 | -2.46 | -0.49 | -1.64 | -0.04 | -1.74 | -0.58 | -1.81 | -0.88 | -1.67 |
| cassava4.1_018335m.g | PS.lightreaction.photosystem I.PSI polypeptide subunits   | photosystem I subunit O                                                                     | -0.63 | -2.45 | -0.11 | -2.70 | 0.03  | -3.21 | -0.70 | -2.46 | -0.81 | -2.88 |
| cassava4.1_014010m.g | PS.lightreaction.photosystem II.PSII polypeptide subunits | photosystem II subunit P-1                                                                  | -0.62 | -1.94 | -0.07 | -1.68 | -0.08 | -1.22 | -0.80 | -1.01 | -0.51 | -1.31 |
| cassava4.1_017616m.g | PS.lightreaction.photosystem I.PSI polypeptide subunits   | photosystem I reaction center subunit PSI-N, chloroplast, putative / PSI-N, putative (PSAN) | -0.61 | -3.27 | -0.69 | -3.38 | 0.08  | -2.49 | -0.34 | -2.34 | -1.08 | -3.04 |
| cassava4.1_015083m.g | PS.lightreaction.photosystem II.PSII polypeptide subunits | unclear                                                                                     | -0.61 | -2.30 | -0.63 | -2.14 | -0.13 | -1.82 | -0.49 | -2.37 | -0.80 | -2.14 |
| cassava4.1_011842m.g | PS.lightreaction.cyclic electron flow-chlororespiration   | PGR5-LIKE A                                                                                 | -0.60 | -1.80 | -0.25 | -2.07 | -0.06 | -1.97 | -0.18 | -1.80 | -0.88 | -2.53 |
| cassava4.1_013916m.g | PS.lightreaction.photosystem I.LHC-I                      | photosystem I light harvesting complex gene 2                                               | -0.60 | -3.24 | 0.15  | -3.21 | 0.01  | -2.78 | -0.64 | -2.45 | -0.71 | -2.91 |
| cassava4.1_020972m.g | PS.lightreaction.ATP synthase.subunit B_ (ATPX)           | Ubiquitin-like superfamily protein                                                          | -0.59 | -1.98 | -0.52 | -1.77 | 0.00  | -1.40 | -0.48 | -1.57 | -0.74 | -1.83 |
| cassava4.1_016312m.g | PS.lightreaction.photosystem I.PSI polypeptide subunits   | photosystem I subunit D-1                                                                   | -0.58 | -2.28 | -0.16 | -2.10 | 0.04  | -1.56 | -0.88 | -1.54 | -0.68 | -2.07 |



|                      |                                                           |                                                                                   |       |       |       |       |       |       |       |       |       |       |
|----------------------|-----------------------------------------------------------|-----------------------------------------------------------------------------------|-------|-------|-------|-------|-------|-------|-------|-------|-------|-------|
| cassava4.1_013735m.g | PS.lightreaction.photosystem II.PSII polypeptide subunits | Chlorophyll A-B binding family protein                                            | -0.57 | -2.92 | -0.25 | -3.28 | 0.01  | -3.37 | -0.21 | -1.70 | -0.86 | -2.97 |
| cassava4.1_015240m.g | PS.lightreaction.NADH DH                                  | subunit NDH-M of NAD(P)H:plastoquinone dehydrogenase complex                      | -0.57 | -1.48 | -0.55 | -1.85 | -0.10 | -1.82 | -0.63 | -0.94 | -0.97 | -2.14 |
| cassava4.1_018584m.g | PS.lightreaction.photosystem I.PSI polypeptide subunits   | photosystem I subunit H-1                                                         | -0.54 | -2.43 | -0.24 | -2.26 | 0.12  | -2.59 | -0.66 | -1.74 | -1.12 | -2.61 |
| cassava4.1_016411m.g | PS.lightreaction.photosystem I.PSI polypeptide subunits   | photosystem I subunit D-1                                                         | -0.54 | -1.51 | -0.25 | -1.87 | 0.05  | -1.92 | -0.76 | -1.59 | -0.93 | -2.29 |
| cassava4.1_013872m.g | PS.lightreaction.photosystem II.PSII polypeptide subunits | Mog1/PsbP/DUF1795-like photosystem II reaction center PsbP family protein         | -0.52 | -3.34 | -0.07 | -1.53 | 0.15  | -1.39 | 0.44  | -1.44 | -0.45 | -1.58 |
| cassava4.1_018544m.g | PS.lightreaction.photosystem I.PSI polypeptide subunits   | photosystem I subunit E-2                                                         | -0.52 | -2.16 | -0.16 | -2.33 | 0.06  | -2.15 | -0.63 | -1.90 | -0.73 | -2.55 |
| cassava4.1_019040m.g | PS.lightreaction.photosystem II.PSII polypeptide subunits | photosystem II reaction center W                                                  | -0.52 | -2.25 | -0.42 | -2.71 | 0.07  | -2.40 | -0.48 | -2.00 | -0.92 | -2.53 |
| cassava4.1_010951m.g | PS.lightreaction.photosystem II.LHC-II                    | Chlorophyll A-B binding family protein                                            | -0.50 | -1.73 | -0.01 | -1.86 | 0.07  | -1.87 | -0.47 | -1.82 | -0.81 | -2.53 |
| cassava4.1_026492m.g | PS.lightreaction.photosystem II.PSII polypeptide subunits | Photosystem II reaction center PsbP family protein                                | -0.49 | -1.11 | -0.09 | -0.60 | -0.16 | -0.88 | -0.41 | -1.13 | -0.72 | -1.19 |
| cassava4.1_016712m.g | PS.lightreaction.photosystem II.PSII polypeptide subunits | photosystem II BY                                                                 | -0.48 | -1.69 | -0.24 | -1.96 | -0.04 | -1.67 | -0.53 | -1.36 | -1.15 | -2.34 |
| cassava4.1_018917m.g | PS.lightreaction.photosystem II.PSII polypeptide subunits | photosystem II reaction center W                                                  | -0.48 | -2.08 | -0.32 | -2.14 | 0.01  | -1.72 | -0.34 | -1.56 | -0.84 | -2.20 |
| cassava4.1_015547m.g | PS.lightreaction.NADH DH                                  | oxidoreductases, acting on NADH or NADPH, quinone or similar compound as acceptor | -0.44 | -1.90 | -0.68 | -1.77 | 0.05  | -2.06 | -0.75 | -0.96 | -0.85 | -1.86 |
| cassava4.1_030615m.g | PS.lightreaction.ATP synthase.chloroplastic subunit a     | ATPase, F0 complex, subunit A protein                                             | -0.43 | -0.49 | -0.11 | -0.09 | 0.46  | -0.35 | 0.10  | -2.20 | -0.32 | -1.59 |
| cassava4.1_016692m.g | PS.lightreaction.photosystem II.PSII polypeptide subunits | low psii accumulation2                                                            | -0.42 | -0.67 | -0.05 | -0.37 | 0.23  | -0.72 | -0.85 | -0.64 | -0.66 | -1.03 |
| cassava4.1_018334m.g | PS.lightreaction.photosystem I.PSI polypeptide subunits   | photosystem I subunit G                                                           | -0.38 | -1.68 | -0.23 | -2.02 | 0.00  | -1.61 | -0.39 | -1.59 | -0.70 | -2.01 |
| cassava4.1_013957m.g | PS.lightreaction.photosystem I.LHC-I                      | photosystem I light harvesting complex gene 2                                     | -0.37 | -2.64 | -0.14 | -2.68 | 0.08  | -2.53 | -0.63 | -1.72 | -0.89 | -2.68 |
| cassava4.1_016854m.g | PS.lightreaction.photosystem II.PSII polypeptide subunits | photosystem II BY                                                                 | -0.37 | -1.81 | -0.13 | -2.11 | 0.03  | -1.83 | -0.46 | -1.36 | -1.34 | -2.59 |
| cassava4.1_018756m.g | PS.lightreaction.photosystem II.PSII polypeptide          | photosystem II subunit R                                                          | -0.36 | -1.80 | -0.24 | -1.92 | -0.05 | -2.05 | -0.48 | -1.42 | -1.22 | -2.90 |

|                      |                                                                               |                                                     |       |       |       |       |       |       |       |       |       |       |
|----------------------|-------------------------------------------------------------------------------|-----------------------------------------------------|-------|-------|-------|-------|-------|-------|-------|-------|-------|-------|
|                      | subunits                                                                      |                                                     |       |       |       |       |       |       |       |       |       |       |
| cassava4.1_013684m.g | PS.lightreaction.photosystem I.LHC-I                                          | photosystem I light harvesting complex gene 3       | -0.36 | -2.84 | -0.32 | -2.82 | 0.04  | -2.15 | -0.41 | -2.00 | -0.78 | -2.57 |
| cassava4.1_018388m.g | PS.lightreaction.other electron carrier<br>(ox/red).ferredoxin                | 2Fe-2S ferredoxin-like superfamily protein          | -0.35 | -1.09 | -0.71 | -1.20 | -0.34 | -0.84 | -0.32 | -1.53 | -0.51 | -1.32 |
| cassava4.1_019355m.g | PS.lightreaction.cyclic electron flow-chlororespiration                       | proton gradient regulation 5                        | -0.34 | -1.94 | 0.13  | -0.03 | -0.02 | -0.32 | -0.26 | -0.05 | -0.83 | -1.61 |
| cassava4.1_004476m.g | PS.lightreaction.state transition                                             | STT7 homolog STN7                                   | -0.32 | -1.32 | -0.08 | -1.20 | 0.04  | -1.24 | 0.12  | -1.84 | -0.68 | -2.04 |
| cassava4.1_019321m.g | PS.lightreaction.cyclic electron flow-chlororespiration                       | proton gradient regulation 5                        | -0.29 | -2.37 | -0.10 | -1.31 | 0.03  | -1.78 | -0.17 | -0.50 | -1.02 | -2.22 |
| cassava4.1_017598m.g | PS.lightreaction.photosystem II.PSII polypeptide<br>subunits                  | photosystem II family protein                       | -0.28 | -1.62 | -0.17 | -1.23 | 0.11  | -1.36 | -0.85 | -1.41 | -0.71 | -1.66 |
| cassava4.1_004477m.g | PS.lightreaction.state transition                                             | STT7 homolog STN7                                   | -0.25 | -1.61 | -0.25 | -2.00 | 0.00  | -2.42 | -0.17 | -1.94 | -0.71 | -2.63 |
| cassava4.1_012618m.g | PS.lightreaction.other electron carrier<br>(ox/red).ferredoxin oxidoreductase | FAD/NAD(P)-binding oxidoreductase                   | -0.24 | -0.96 | -0.19 | -0.66 | 0.01  | -0.32 | -0.35 | -1.17 | -0.56 | -1.53 |
| cassava4.1_013632m.g | PS.lightreaction.photosystem II.LHC-II                                        | light harvesting complex photosystem II subunit 6   | -0.21 | -1.85 | -0.22 | -1.95 | 0.10  | -1.71 | -0.70 | -1.00 | -0.90 | -2.00 |
| cassava4.1_031236m.g | PS.lightreaction.photosystem II.PSII polypeptide<br>subunits                  | photosystem II reaction center protein A            | -0.15 | -0.97 | -1.38 | -1.02 | 0.36  | -0.11 | -0.45 | -1.01 | -0.94 | -1.63 |
| cassava4.1_016776m.g | PS.lightreaction.other electron carrier<br>(ox/red).ferredoxin                | NDH-dependent cyclic electron flow 1                | -0.09 | -0.33 | -0.60 | -1.79 | -0.25 | -2.48 | -0.60 | -0.52 | -0.91 | -0.86 |
| cassava4.1_027296m.g | PS.lightreaction.photosystem I.PSI polypeptide subunits                       | Photosystem I, PsaA/PsaB protein                    | -0.04 | -0.42 | -1.97 | -0.82 | -0.14 | -1.31 | -0.53 | -2.52 | -0.10 | -1.97 |
| cassava4.1_013335m.g | PS.lightreaction.cyclic electron flow-chlororespiration                       | post-illumination chlorophyll fluorescence increase | -0.03 | -1.60 | -0.03 | -2.39 | 0.11  | -2.90 | -0.16 | -1.29 | -0.71 | -2.74 |
| cassava4.1_018830m.g | PS.lightreaction.photosystem II.PSII polypeptide<br>subunits                  | photosystem II subunit R                            | 0.28  | -0.12 | -0.06 | -1.59 | 0.27  | -1.41 | -0.24 | -0.38 | -0.92 | -2.73 |
| cassava4.1_025967m.g | PS.lightreaction.ATP synthase                                                 | ATP synthase protein I -related                     | 0.31  | 0.18  | 0.17  | -1.60 | 0.03  | -2.22 | 0.00  | -0.64 | -0.48 | -1.71 |
| cassava4.1_029388m.g | PS.lightreaction.photosystem I.PSI polypeptide subunits                       | Photosystem I, PsaA/PsaB protein                    | 0.34  | -0.01 | -1.34 | -0.31 | -0.55 | -1.28 | -0.46 | -2.15 | -0.11 | -2.27 |
| cassava4.1_020912m.g | PS.lightreaction.ATP synthase.chloroplastic subunit a                         | ATPase, F0 complex, subunit A protein               | 0.35  | 0.29  | -0.91 | -0.66 | 0.91  | -0.48 | -0.29 | -2.27 | -0.43 | -1.84 |
| cassava4.1_022954m.g | PS.lightreaction.photosystem I.PSI polypeptide subunits                       | Photosystem I, PsaA/PsaB protein                    | 0.48  | -1.13 | -0.05 | -0.66 | -0.16 | -1.20 | -0.10 | -1.78 | 0.05  | -2.08 |
| cassava4.1_031110m.g | PS.lightreaction.photosystem II.PSII polypeptide<br>subunits                  | photosystem II reaction center protein D            | 0.49  | 0.38  | -0.65 | -0.40 | -1.05 | -0.77 | 0.62  | -2.04 | -0.47 | -2.67 |
| Calvin Cycle         | PS.calvin cycle.Rib5P Isomerase                                               | NagB/RpiA/CoA transferase-like superfamily protein  | -1.53 | -2.32 | -0.73 | -2.55 | -0.03 | -3.17 | -1.05 | -2.51 | -0.93 | -2.97 |

|                      |                                             |                                                               |       |       |       |       |       |       |       |       |       |       |
|----------------------|---------------------------------------------|---------------------------------------------------------------|-------|-------|-------|-------|-------|-------|-------|-------|-------|-------|
| cassava4.1_017243m.g | PS.calvin cycle.rubisco small subunit       | Ribulose biphosphate carboxylase (small chain) family protein | -1.48 | -2.83 | -0.71 | -2.14 | -0.13 | -3.06 | -1.31 | -2.70 | -0.82 | -2.71 |
| cassava4.1_030397m.g | PS.calvin cycle.FBPase                      | high cyclic electron flow 1                                   | -1.46 | -3.28 | 0.45  | -0.61 | 0.36  | -2.44 | -1.10 | -3.65 | -0.94 | -2.08 |
| cassava4.1_012057m.g | PS.calvin cycle.TPI                         | triosephosphate isomerase                                     | -1.39 | -1.73 | -0.39 | -0.79 | -0.29 | -0.58 | -1.15 | -1.48 | -0.74 | -0.61 |
| cassava4.1_011197m.g | PS.calvin cycle.FBPase                      | Inositol monophosphatase family protein                       | -1.36 | -3.76 | -0.89 | -3.04 | -0.37 | -3.56 | -0.19 | -3.54 | -0.76 | -3.53 |
| cassava4.1_007468m.g | PS.calvin cycle.GAP                         | glyceraldehyde-3-phosphate dehydrogenase B subunit            | -1.24 | -5.51 | -0.65 | -5.32 | -0.11 | -5.90 | -0.49 | -4.58 | -0.91 | -5.38 |
| cassava4.1_010561m.g | PS.calvin cycle.aldolase                    | Aldolase superfamily protein                                  | -1.17 | -4.18 | -0.72 | -4.45 | -0.10 | -4.50 | -0.84 | -3.41 | -1.18 | -4.14 |
| cassava4.1_006492m.g | PS.calvin cycle.rubisco interacting         | Rubisco methyltransferase family protein                      | -1.15 | -2.17 | -0.72 | -0.95 | -0.07 | -1.77 | -0.88 | -0.73 | 0.09  | -0.49 |
| cassava4.1_006605m.g | PS.calvin cycle.phosphoglycerate kinase     | Phosphoglycerate kinase family protein                        | -1.07 | -3.08 | -0.44 | -2.95 | -0.34 | -3.22 | -0.49 | -2.47 | -0.96 | -3.34 |
| cassava4.1_008668m.g | PS.calvin cycle.FBPase                      | high cyclic electron flow 1                                   | -1.07 | -3.35 | -0.55 | -3.05 | -0.02 | -3.81 | -0.82 | -2.46 | -0.91 | -3.01 |
| cassava4.1_008849m.g | PS.calvin cycle.PRK                         | phosphoribulokinase                                           | -1.04 | -3.22 | -0.58 | -2.94 | -0.11 | -3.41 | -0.52 | -2.56 | -0.97 | -3.10 |
| cassava4.1_014454m.g | PS.calvin cycle.TPI                         | triosephosphate isomerase                                     | -1.01 | -2.70 | -0.35 | -1.79 | -0.28 | -1.66 | -0.55 | -2.79 | -0.88 | -2.74 |
| cassava4.1_008960m.g | PS.calvin cycle.GAP                         | glyceraldehyde 3-phosphate dehydrogenase A subunit            | -0.88 | -2.75 | -0.56 | -2.14 | -0.09 | -2.04 | -0.77 | -2.27 | -0.91 | -2.55 |
| cassava4.1_017170m.g | PS.calvin cycle.rubisco small subunit       | Ribulose biphosphate carboxylase (small chain) family protein | -0.88 | -3.08 | -0.49 | -2.78 | -0.09 | -3.52 | -0.52 | -2.63 | -0.82 | -2.77 |
| cassava4.1_014243m.g | PS.calvin cycle.FBPase                      | Inositol monophosphatase family protein                       | -0.87 | -3.71 | -0.43 | -2.52 | -0.20 | -3.82 | -0.19 | -2.93 | -0.50 | -3.12 |
| cassava4.1_012016m.g | PS.calvin cycle.TPI                         | triosephosphate isomerase                                     | -0.83 | -1.29 | -0.23 | -0.79 | -0.15 | -1.06 | -0.77 | -1.58 | -0.87 | -1.50 |
| cassava4.1_006803m.g | PS.calvin cycle.rubisco interacting         | rubisco activase                                              | -0.81 | -3.62 | -0.69 | -3.00 | -0.31 | -3.54 | -0.45 | -2.90 | -0.84 | -3.52 |
| cassava4.1_002307m.g | PS.calvin cycle.transketolase               | Transketolase                                                 | -0.80 | -2.18 | -0.27 | -1.06 | -0.06 | -0.56 | -0.38 | -1.47 | -0.68 | -1.60 |
| cassava4.1_008965m.g | PS.calvin cycle.GAP                         | glyceraldehyde 3-phosphate dehydrogenase A subunit            | -0.78 | -2.98 | -0.47 | -2.20 | -0.15 | -2.36 | -0.67 | -2.44 | -0.82 | -2.60 |
| cassava4.1_013583m.g | PS                                          | acclimation of photosynthesis to environment                  | -0.74 | -2.09 | -0.29 | -1.71 | 0.11  | -1.72 | -0.42 | -1.71 | -0.93 | -2.30 |
| cassava4.1_009395m.g | PS.calvin cycle.sedoheptulose biphosphatase | sedoheptulose-biphosphatase                                   | -0.73 | -2.57 | -0.52 | -1.88 | 0.03  | -2.07 | -0.37 | -1.59 | -0.77 | -2.15 |
| cassava4.1_008894m.g | PS.calvin cycle.PRK                         | phosphoribulokinase                                           | -0.71 | -1.81 | -0.36 | -1.65 | -0.02 | -2.00 | -0.64 | -1.41 | -0.94 | -2.35 |
| cassava4.1_007476m.g | PS.calvin cycle.GAP                         | glyceraldehyde-3-phosphate dehydrogenase B subunit            | -0.68 | -1.58 | -0.33 | -1.23 | -0.10 | -1.57 | -0.45 | -1.95 | -0.55 | -1.93 |
| cassava4.1_006183m.g | PS.calvin cycle.GAP                         | aldehyde dehydrogenase 11A3                                   | -0.63 | -2.11 | -0.19 | -0.53 | -0.03 | 0.13  | -0.10 | -0.48 | -0.71 | -0.82 |
| cassava4.1_009163m.g | PS.calvin cycle.aldolase                    | fructose-biphosphate aldolase 2                               | -0.57 | -2.44 | -0.23 | -2.35 | -0.01 | -3.18 | 0.07  | -2.81 | -0.25 | -2.84 |
| cassava4.1_009140m.g | PS.calvin cycle.aldolase                    | fructose-biphosphate aldolase 2                               | -0.55 | -2.12 | -0.62 | -2.29 | 0.09  | -2.07 | -0.47 | -2.20 | -0.50 | -2.67 |
| cassava4.1_006596m.g | PS.calvin cycle.phosphoglycerate kinase     | Phosphoglycerate kinase family protein                        | -0.51 | -1.28 | -0.27 | -0.93 | 0.05  | -0.85 | -0.50 | -1.40 | -0.76 | -2.00 |

|                      |                      |                                                     |                                                                          |       |       |       |       |       |       |       |       |       |       |
|----------------------|----------------------|-----------------------------------------------------|--------------------------------------------------------------------------|-------|-------|-------|-------|-------|-------|-------|-------|-------|-------|
|                      | cassava4.1_009143m.g | PS.calvin cycle.aldolase                            | fructose-bisphosphate aldolase 2                                         | -0.51 | -2.79 | -0.47 | -2.20 | -0.03 | -1.77 | -0.18 | -1.58 | -0.62 | -2.17 |
|                      | cassava4.1_017330m.g | PS.calvin cycle.rubisco large subunit               | ribulose-bisphosphate carboxylases                                       | -0.47 | -0.25 | -1.21 | -0.37 | 0.11  | -0.06 | -1.09 | -1.99 | -0.83 | -2.31 |
|                      | cassava4.1_013479m.g | PS.calvin cycle.RPE                                 | D-ribulose-5-phosphate-3-epimerase                                       | -0.45 | -1.70 | -0.32 | -1.86 | -0.08 | -2.41 | -0.31 | -1.90 | -0.97 | -2.82 |
|                      | cassava4.1_006796m.g | PS.calvin cycle.rubisco interacting                 | rubisco activase                                                         | -0.31 | -2.06 | -0.27 | -2.60 | -0.12 | -2.21 | 1.45  | -1.09 | -0.29 | -2.37 |
|                      | cassava4.1_033564m.g | PS.calvin cycle.rubisco interacting                 | P-loop containing nucleoside triphosphate hydrolases superfamily protein | -0.29 | -1.46 | -0.06 | -0.88 | 0.03  | -1.90 | 0.39  | -2.44 | -0.52 | -2.20 |
|                      | cassava4.1_009003m.g | PS.calvin cycle.phosphoglycerate kinase             | phosphoglycerate kinase                                                  | -0.07 | -0.16 | 0.02  | -0.10 | -0.13 | 0.06  | -0.23 | 0.08  | -0.69 | -1.08 |
|                      | cassava4.1_019184m.g | PS.calvin cycle                                     | CPI2 domain-containing protein 2                                         | 0.37  | 0.01  | 0.00  | -1.28 | 0.16  | -1.55 | -0.35 | -0.61 | -0.79 | -1.77 |
|                      | cassava4.1_023305m.g | PS.calvin cycle.rubisco large subunit               | ribulose-bisphosphate carboxylases                                       | 0.67  | -0.34 | -1.78 | -0.56 | -0.03 | -0.72 | -1.03 | -1.53 | -0.32 | -2.29 |
| Photorespiration     | cassava4.1_005710m.g | PS.photorespiration.serine hydroxymethyltransferase | serine transhydroxymethyltransferase 1                                   | -1.25 | -3.78 | -0.61 | -4.50 | 0.01  | -4.10 | -0.12 | -3.73 | -0.92 | -4.28 |
|                      | cassava4.1_005814m.g | PS.photorespiration.serine hydroxymethyltransferase | serine transhydroxymethyltransferase 1                                   | -1.16 | -3.56 | -0.34 | -2.81 | 0.05  | -3.22 | -0.33 | -2.73 | -0.70 | -2.98 |
|                      | cassava4.1_008994m.g | PS.photorespiration.aminotransferases peroxisomal   | alanine:glyoxylate aminotransferase                                      | -1.05 | -3.36 | -0.77 | -3.49 | -0.09 | -3.05 | -0.19 | -2.29 | -0.57 | -2.68 |
|                      | cassava4.1_017913m.g | PS.photorespiration.glycine cleavage.H protein      | Single hybrid motif superfamily protein                                  | -0.98 | -2.64 | -1.00 | -2.60 | -0.10 | -2.30 | -0.69 | -1.75 | -1.05 | -2.30 |
|                      | cassava4.1_009477m.g | PS.photorespiration.hydroxypyruvate reductase       | hydroxypyruvate reductase                                                | -0.88 | -2.85 | -0.51 | -2.71 | -0.04 | -2.81 | -0.33 | -2.24 | -0.81 | -2.88 |
|                      | cassava4.1_011790m.g | PS.photorespiration                                 | formyltetrahydrofolate deformylase, putative                             | -0.72 | -2.09 | -0.23 | -1.09 | -0.05 | -1.99 | -0.39 | -1.87 | -0.56 | -1.86 |
|                      | cassava4.1_008989m.g | PS.photorespiration.aminotransferases peroxisomal   | alanine:glyoxylate aminotransferase                                      | -0.69 | -2.17 | -0.67 | -2.37 | 0.00  | -1.82 | -0.13 | -1.84 | -0.57 | -2.53 |
|                      | cassava4.1_010145m.g | PS.photorespiration.glycolate oxydase               | Aldolase-type TIM barrel family protein                                  | -0.67 | -2.98 | -0.33 | -2.89 | 0.06  | -2.87 | -0.06 | -1.82 | -0.54 | -2.51 |
|                      | cassava4.1_010148m.g | PS.photorespiration.glycolate oxydase               | Aldolase-type TIM barrel family protein                                  | -0.64 | -2.37 | -0.52 | -2.10 | -0.14 | -1.88 | -0.27 | -1.99 | -0.74 | -2.48 |
|                      | cassava4.1_006274m.g | PS.photorespiration.glycerate kinase                | P-loop containing nucleoside triphosphate hydrolases superfamily protein | -0.54 | -1.45 | -0.10 | -1.45 | 0.05  | -1.83 | -0.19 | -1.64 | -0.61 | -2.16 |
|                      | cassava4.1_012207m.g | PS.photorespiration.hydroxypyruvate reductase       | D-isomer specific 2-hydroxyacid dehydrogenase family protein             | -0.42 | -2.01 | 0.14  | -2.17 | 0.15  | -2.58 | -0.46 | -1.42 | -0.58 | -2.18 |
|                      | cassava4.1_004233m.g | nitrite reductase 1                                 | N-metabolism.nitrate metabolism.nitrite reductase                        | -2.35 | -3.89 | -0.98 | -0.68 | -0.31 | -2.51 | -1.02 | -3.32 | -0.51 | -1.51 |
|                      | cassava4.1_009848m.g | FMN-linked oxidoreductases superfamily protein      | N-metabolism.misc                                                        | -1.18 | -1.61 | -0.16 | -0.46 | 0.12  | -0.41 | -0.26 | -2.46 | -0.37 | -1.36 |
|                      | cassava4.1_008019m.g | glutamine synthetase 2                              | N-metabolism.ammonia metabolism.glutamine synthetase                     | -1.05 | -2.83 | -0.45 | -2.12 | -0.22 | -2.78 | -0.85 | -2.59 | -0.71 | -2.54 |
|                      | cassava4.1_000214m.g | glutamate synthase 1                                | N-metabolism.ammonia metabolism.glutamate synthase                       | -0.99 | -2.47 | -0.27 | -2.31 | -0.37 | -2.45 | 0.10  | -2.91 | -0.78 | -3.14 |
|                      | cassava4.1_031400m.g | nitrate reductase 1                                 | N-metabolism.nitrate metabolism.NR                                       | -0.98 | -2.84 | -0.45 | -1.49 | -0.15 | -3.11 | -0.49 | -3.61 | -0.40 | -2.09 |
| cassava4.1_007225m.g | nitrate reductase 1  | N-metabolism.nitrate metabolism.NR                  | -0.84                                                                    | -2.80 | -0.64 | -1.31 | 0.00  | -2.69 | -0.62 | -3.58 | -0.29 | -1.46 |       |

|                        |                                                      |                                                                                         |                                                                                                           |       |       |       |       |       |       |       |       |       |       |
|------------------------|------------------------------------------------------|-----------------------------------------------------------------------------------------|-----------------------------------------------------------------------------------------------------------|-------|-------|-------|-------|-------|-------|-------|-------|-------|-------|
|                        | cassava4.1_003338m.g                                 | nitroreductase family protein                                                           | N-metabolism.misc                                                                                         | -0.60 | -1.13 | -0.73 | -1.46 | -0.11 | -0.79 | 0.21  | -0.74 | -0.41 | -1.26 |
|                        | cassava4.1_009228m.g                                 | sulfite oxidase                                                                         | N-metabolism.nitrate metabolism.NR                                                                        | -0.52 | -1.65 | -0.06 | -1.16 | -0.23 | -0.79 | 0.19  | -2.88 | -0.64 | -2.49 |
|                        | cassava4.1_000040m.g                                 | NADH-dependent glutamate synthase 1                                                     | N-metabolism.ammonia metabolism.glutamate synthase                                                        | -0.30 | -2.18 | -0.20 | -2.68 | -0.36 | -2.31 | 0.53  | -1.75 | -1.09 | -3.48 |
|                        | cassava4.1_010581m.g                                 | glutamine synthase clone R1                                                             | N-metabolism.ammonia metabolism.glutamine synthetase                                                      | -0.26 | 0.09  | -0.03 | 0.94  | -0.09 | 1.32  | -0.83 | -0.62 | -0.31 | -0.33 |
|                        | cassava4.1_000038m.g                                 | NADH-dependent glutamate synthase 1                                                     | N-metabolism.ammonia metabolism.glutamate synthase                                                        | 0.09  | 0.02  | 0.51  | 0.81  | -0.38 | 0.89  | 0.97  | 0.24  | 0.24  | 0.81  |
|                        | cassava4.1_001290m.g                                 | signalling.in sugar and nutrient physiology                                             | glutamate receptor 5                                                                                      | 0.22  | 0.80  | 0.64  | 0.83  | 0.12  | 0.08  | 0.27  | 0.86  | 0.44  | 0.88  |
|                        | cassava4.1_010597m.g                                 | glutamine synthase clone R1                                                             | N-metabolism.ammonia metabolism.glutamine synthetase                                                      | 0.29  | 0.27  | 0.01  | 0.19  | -0.30 | -0.07 | -1.14 | -0.59 | -0.15 | -0.51 |
| Tetrapyrrole Synthesis | cassava4.1_028676m.g                                 | tetrapyrrole synthesis.uroporphyrin-III C-methyltransferase                             | uroporphyrin methylase 1                                                                                  | -1.89 | -1.78 | 0.44  | 1.49  | -0.40 | 0.16  | -1.40 | -2.91 | 0.13  | -0.44 |
|                        | cassava4.1_010226m.g                                 | tetrapyrrole synthesis.uroporphyrin-III C-methyltransferase                             | uroporphyrin methylase 1                                                                                  | -1.53 | -2.13 | 0.22  | 0.45  | -0.70 | -0.50 | -0.75 | -2.86 | -0.84 | -1.25 |
|                        | cassava4.1_027491m.g                                 | tetrapyrrole synthesis.ALA dehydratase                                                  | Aldolase superfamily protein                                                                              | -0.97 | -2.63 | 0.19  | -1.67 | 0.04  | -2.49 | -0.88 | -2.32 | -0.57 | -2.29 |
|                        | cassava4.1_031984m.g                                 | tetrapyrrole synthesis.uroporphyrinogen III synthase                                    | uroporphyrinogen-III synthase family protein                                                              | -0.95 | -1.60 | -0.62 | -0.86 | -0.36 | -1.83 | 0.02  | -1.67 | -0.04 | -1.13 |
|                        | cassava4.1_013789m.g                                 | tetrapyrrole synthesis.regulation                                                       | enzyme binding;tetrapyrrole binding                                                                       | -0.92 | -3.38 | -0.56 | -2.41 | 0.09  | -1.99 | -0.02 | -1.70 | -0.40 | -2.54 |
|                        | cassava4.1_000280m.g                                 | tetrapyrrole synthesis.magnesium chelatase                                              | magnesium-chelatase subunit chlH, chloroplast, putative / Mg-protoporphyrin IX chelatase, putative (CHLH) | -0.91 | -2.90 | -0.16 | -2.19 | -0.12 | -2.38 | -0.14 | -2.19 | -0.58 | -2.66 |
|                        | cassava4.1_002247m.g                                 | tetrapyrrole synthesis.magnesium chelatase                                              | ALBINA 1                                                                                                  | -0.74 | -1.35 | -0.41 | -1.00 | -0.09 | -1.72 | -0.25 | -1.02 | 0.04  | -0.22 |
|                        | cassava4.1_005000m.g                                 | tetrapyrrole synthesis.glu-tRNA synthetase                                              | Amidase family protein                                                                                    | -0.73 | -1.70 | -0.42 | -1.29 | -0.02 | -0.77 | -0.61 | -0.74 | -0.40 | -0.86 |
|                        | cassava4.1_008391m.g                                 | tetrapyrrole synthesis.magnesium chelatase                                              | P-loop containing nucleoside triphosphate hydrolases superfamily protein                                  | -0.72 | -1.50 | -0.30 | -1.04 | -0.09 | -1.33 | -1.00 | -1.08 | -0.64 | -1.09 |
|                        | cassava4.1_004598m.g                                 | tetrapyrrole synthesis.glu-tRNA synthetase                                              | GLU-ADT subunit B                                                                                         | -0.72 | -1.24 | -0.01 | -0.44 | -0.18 | -0.78 | -0.68 | -1.22 | -0.37 | -0.82 |
|                        | cassava4.1_008382m.g                                 | tetrapyrrole synthesis.magnesium chelatase                                              | magnesium chelatase i2                                                                                    | -0.69 | -1.46 | 0.12  | -0.68 | 0.16  | -1.51 | -0.57 | 0.65  | -0.16 | 0.19  |
|                        | cassava4.1_008691m.g                                 | tetrapyrrole synthesis.magnesium-protoporphyrin IX monomethyl ester (oxidative) cyclase | dicarboxylate diiron protein, putative (Crd1)                                                             | -0.64 | -2.84 | -0.25 | -2.29 | 0.04  | -2.36 | -0.49 | -1.80 | -0.87 | -2.33 |
|                        | cassava4.1_009378m.g                                 | tetrapyrrole synthesis.uroporphyrinogen decarboxylase                                   | Uroporphyrinogen decarboxylase                                                                            | -0.61 | -1.30 | -0.01 | -1.24 | 0.07  | -1.91 | -0.66 | -0.97 | -0.50 | -1.08 |
|                        | cassava4.1_009000m.g                                 | tetrapyrrole synthesis.coproporphyrinogen III oxidase                                   | Coproporphyrinogen III oxidase                                                                            | -0.59 | -0.85 | -0.18 | -0.46 | -0.10 | -0.29 | -0.64 | -0.70 | -0.16 | -0.43 |
|                        | cassava4.1_008036m.g                                 | tetrapyrrole synthesis.ALA dehydratase                                                  | Aldolase superfamily protein                                                                              | -0.56 | -1.17 | -0.03 | -0.82 | -0.05 | -0.81 | -0.43 | -0.78 | -0.41 | -0.78 |
| cassava4.1_008914m.g   | tetrapyrrole synthesis.protochlorophyllide reductase | protochlorophyllide oxidoreductase C                                                    | -0.55                                                                                                     | -2.06 | -0.28 | -2.33 | 0.00  | -1.76 | 0.39  | -1.58 | -0.46 | -1.93 |       |

|                      |                                                                      |                                                                     |       |       |       |       |       |       |       |       |       |       |
|----------------------|----------------------------------------------------------------------|---------------------------------------------------------------------|-------|-------|-------|-------|-------|-------|-------|-------|-------|-------|
| cassava4.1_006730m.g | tetrapyrrole synthesis.GSA                                           | glutamate-1-semialdehyde 2,1-aminomutase 2                          | -0.52 | -1.49 | -0.08 | -1.06 | 0.02  | -0.91 | -0.83 | -0.43 | -0.37 | -0.52 |
| cassava4.1_005258m.g | tetrapyrrole synthesis.chlorophyll b synthase                        | Pheophorbide a oxygenase family protein with Rieske [2Fe-2S] domain | -0.49 | -2.33 | -0.19 | -1.90 | 0.14  | -2.25 | -0.12 | -1.93 | -0.52 | -2.15 |
| cassava4.1_004918m.g | tetrapyrrole synthesis.glu-tRNA reductase                            | Glutamyl-tRNA reductase family protein                              | -0.48 | -0.76 | 1.04  | 1.07  | 0.35  | 0.52  | -0.65 | -1.12 | -0.30 | -0.51 |
| cassava4.1_013127m.g | tetrapyrrole synthesis.heme oxygenase                                | Plant haem oxygenase (decyclizing) family protein                   | -0.47 | -0.73 | -0.42 | -0.94 | -0.09 | -0.51 | 0.00  | -1.76 | -0.85 | -2.11 |
| cassava4.1_009920m.g | tetrapyrrole synthesis.chlorophyll synthase                          | UbiA prenyltransferase family protein                               | -0.46 | -0.43 | -0.21 | -0.55 | -0.10 | -0.80 | -0.28 | -1.05 | -0.09 | -0.73 |
| cassava4.1_007874m.g | tetrapyrrole synthesis.ferrochelatase                                | ferrochelatase 2                                                    | -0.36 | -1.53 | -0.23 | -0.89 | 0.00  | -0.74 | 0.10  | -0.47 | -0.33 | -0.74 |
| cassava4.1_011961m.g | tetrapyrrole synthesis.magnesium protoporphyrin IX methyltransferase | magnesium-protoporphyrin IX methyltransferase                       | -0.35 | -2.00 | 0.16  | -2.31 | -0.04 | -2.35 | -0.66 | -1.26 | -0.26 | -1.23 |
| cassava4.1_017765m.g | tetrapyrrole synthesis.uroporphyrinogen III synthase                 | uroporphyrinogen-III synthase family protein                        | -0.31 | -1.19 | -0.10 | -0.95 | 0.06  | -1.90 | -0.38 | -1.96 | -0.94 | -1.90 |
| cassava4.1_008498m.g | tetrapyrrole synthesis.divinyl chlorophyllide-a 8-vinyl-reductase    | NAD(P)-binding Rossmann-fold superfamily protein                    | -0.29 | -0.83 | 0.49  | -0.42 | -0.10 | -1.36 | 0.19  | -0.93 | -0.61 | -1.56 |
| cassava4.1_009063m.g | tetrapyrrole synthesis.protochlorophyllide reductase                 | protochlorophyllide oxidoreductase A                                | 0.54  | -0.30 | 0.42  | -1.38 | 0.04  | -2.21 | -0.88 | 0.10  | 0.08  | -0.58 |

**Supplemental Table S5. Genes annotated to glycolysis, TCA, mitochondrial electron transport and flavonoid biosynthetic pathway.**

**The extent of differential expression is measured in terms of log2 fold change of treatment vs. control.**

| Table Class          | Cassava ID                                           | Mapman Category                                                               | Short Description                                     | PG0     | FG0   | PG2   | FG2   | PG4   | FG4   | PG0    | FG0   | PG2   | FG2   |
|----------------------|------------------------------------------------------|-------------------------------------------------------------------------------|-------------------------------------------------------|---------|-------|-------|-------|-------|-------|--------|-------|-------|-------|
|                      |                                                      |                                                                               |                                                       | 120 day |       |       |       |       |       | 45 day |       |       |       |
| Glycolysis           | cassava4.1_006973m.g                                 | glycolysis.cytosolic branch.UGPase                                            | UDP-glucose pyrophosphorylase 2                       | -0.46   | -0.20 | -0.35 | -0.01 | -0.31 | 0.07  | -0.48  | -0.78 | -0.77 | -0.99 |
|                      | cassava4.1_006979m.g                                 | glycolysis.cytosolic branch.UGPase                                            | UDP-glucose pyrophosphorylase 2                       | 0.90    | 2.14  | 0.73  | 1.79  | 0.30  | 2.29  | 0.20   | 1.60  | 0.42  | 1.77  |
|                      | cassava4.1_003757m.g                                 | glycolysis.cytosolic branch.phosphofructokinase (PFK)                         | Phosphofructokinase family protein                    | 0.13    | 0.66  | 0.26  | 0.64  | 0.00  | 0.95  | 0.03   | 0.80  | -0.20 | 0.67  |
|                      | cassava4.1_003814m.g                                 | glycolysis.cytosolic branch.phosphofructokinase (PFK)                         | Phosphofructokinase family protein                    | 0.25    | 0.61  | 0.12  | 1.13  | 0.14  | 2.18  | -0.81  | 1.48  | 0.24  | 1.72  |
|                      | cassava4.1_004602m.g                                 | glycolysis.cytosolic branch.phosphofructokinase (PFK)                         | Phosphofructokinase family protein                    | -0.12   | 0.03  | 0.06  | 0.41  | 0.09  | 0.96  | -0.57  | 1.01  | -0.02 | 0.88  |
|                      | cassava4.1_014454m.g                                 | glycolysis.cytosolic branch.triosephosphate isomerase (TPI)                   | triosephosphate isomerase                             | -1.01   | -2.70 | -0.35 | -1.79 | -0.28 | -1.66 | -0.55  | -2.79 | -0.88 | -2.74 |
|                      | cassava4.1_008220m.g                                 | glycolysis.cytosolic branch.glyceraldehyde 3-phosphate dehydrogenase (GAP-DH) | glyceraldehyde-3-phosphate dehydrogenase of plastid 2 | 1.59    | 2.68  | 1.64  | 2.64  | 0.34  | 2.92  | 0.63   | 2.27  | 0.65  | 2.01  |
|                      | cassava4.1_008225m.g                                 | glycolysis.cytosolic branch.glyceraldehyde 3-phosphate dehydrogenase (GAP-DH) | glyceraldehyde-3-phosphate dehydrogenase of plastid 2 | 1.95    | 3.75  | 0.65  | 2.33  | -0.18 | 3.72  | -1.18  | 3.27  | 2.05  | 4.67  |
|                      | cassava4.1_011176m.g                                 | glycolysis.cytosolic branch.glyceraldehyde 3-phosphate dehydrogenase (GAP-DH) | glyceraldehyde-3-phosphate dehydrogenase C subunit 1  | 0.31    | 1.01  | -0.17 | 0.37  | -0.13 | 0.89  | 0.19   | 0.72  | -0.22 | 0.29  |
|                      | cassava4.1_011340m.g                                 | glycolysis.cytosolic branch.glyceraldehyde 3-phosphate dehydrogenase (GAP-DH) | glyceraldehyde-3-phosphate dehydrogenase C subunit 1  | -0.02   | 0.50  | -0.06 | 0.44  | -0.02 | 0.88  | -0.60  | 0.43  | -0.37 | 0.29  |
|                      | cassava4.1_007673m.g                                 | glycolysis.cytosolic branch.enolase                                           | Enolase                                               | 0.22    | 0.34  | 0.24  | 0.75  | 0.16  | 1.08  | 0.31   | 1.04  | 0.03  | 0.70  |
|                      | cassava4.1_006316m.g                                 | glycolysis.cytosolic branch.pyruvate kinase (PK)                              | Pyruvate kinase family protein                        | 0.29    | 1.19  | 0.75  | 2.61  | 0.05  | 2.03  | 0.22   | 0.67  | 0.70  | 2.41  |
|                      | cassava4.1_005850m.g                                 | glycolysis.cytosolic branch.pyruvate kinase (PK)                              | Pyruvate kinase family protein                        | 0.30    | 0.80  | 0.53  | 1.25  | -0.14 | 1.66  | -0.40  | 0.61  | -0.31 | 0.72  |
|                      | cassava4.1_005893m.g                                 | glycolysis.cytosolic branch.pyruvate kinase (PK)                              | Pyruvate kinase family protein                        | 1.27    | 1.82  | 0.35  | 1.49  | 0.18  | 1.08  | -0.44  | 2.10  | -0.17 | 0.52  |
|                      | cassava4.1_000725m.g                                 | glycolysis.cytosolic branch.phospho-enol-pyruvate carboxylase (PEPC)          | phosphoenolpyruvate carboxylase 4                     | 0.08    | -0.05 | -0.05 | -0.73 | 0.09  | -0.31 | 0.30   | -0.98 | -0.05 | -0.56 |
|                      | cassava4.1_001047m.g                                 | glycolysis.cytosolic branch.phospho-enol-pyruvate carboxylase (PEPC)          | phosphoenolpyruvate carboxylase 1                     | -0.88   | -1.80 | -0.22 | -1.18 | -0.07 | -0.96 | -0.12  | -2.21 | -0.53 | -1.84 |
| cassava4.1_003792m.g | glycolysis.plastid branch.phosphoglucosamutase (PGM) | phosphoglucosamine mutase family protein                                      | 0.38                                                  | 1.30    | 0.60  | 1.05  | 0.00  | 0.42  | 0.14  | 1.30   | 0.26  | 0.87  |       |

|     |                      |                                                            |                                                            |       |       |       |       |       |       |       |       |       |       |
|-----|----------------------|------------------------------------------------------------|------------------------------------------------------------|-------|-------|-------|-------|-------|-------|-------|-------|-------|-------|
|     | cassava4.1_006414m.g | glycolysis.plastid branch.glucose-6-phosphate isomerase    | phosphoglucose isomerase 1                                 | 1.55  | 2.39  | 1.14  | 1.65  | 0.25  | 0.64  | -0.42 | 1.63  | 0.12  | 1.28  |
|     | cassava4.1_005217m.g | glycolysis.plastid branch.phosphofruktokinase (PFK)        | phosphofruktokinase 5                                      | 1.12  | 1.68  | 0.88  | 1.78  | 0.23  | 2.05  | -0.03 | 2.01  | -0.07 | 1.77  |
|     | cassava4.1_005438m.g | glycolysis.plastid branch.phosphofruktokinase (PFK)        | phosphofruktokinase 4                                      | 0.43  | 0.64  | 0.15  | 0.25  | 0.20  | 0.55  | -0.49 | 1.22  | 0.26  | 0.91  |
|     | cassava4.1_005418m.g | glycolysis.plastid branch.pyruvate kinase (PK)             | Pyruvate kinase family protein                             | 0.66  | 1.11  | -0.14 | 1.01  | 0.07  | 1.41  | 0.14  | 1.15  | -0.27 | 0.24  |
|     | cassava4.1_004396m.g | glycolysis.plastid branch.pyruvate kinase (PK)             | plastidic pyruvate kinase beta subunit 1                   | 0.00  | 1.36  | 0.39  | 1.87  | -0.10 | 2.37  | -0.68 | 0.43  | 0.23  | 1.52  |
|     | cassava4.1_004405m.g | glycolysis.plastid branch.pyruvate kinase (PK)             | plastidic pyruvate kinase beta subunit 1                   | 0.25  | 1.14  | 0.08  | 0.91  | 0.23  | 1.49  | -0.31 | 1.28  | 0.59  | 1.86  |
|     | cassava4.1_006316m.g | glycolysis.plastid branch.pyruvate kinase (PK)             | Pyruvate kinase family protein                             | 0.29  | 1.19  | 0.75  | 2.61  | 0.05  | 2.03  | 0.22  | 0.67  | 0.70  | 2.41  |
|     | cassava4.1_006063m.g | glycolysis.unclear/dually targeted.phosphoglycerate mutase | phosphoglycerate/bisphosphoglycerate mutase family protein | -0.01 | -1.07 | 0.57  | -0.38 | 0.06  | -0.38 | 0.33  | 0.10  | -0.44 | -0.94 |
|     | cassava4.1_011851m.g | glycolysis.unclear/dually targeted.phosphoglycerate mutase | Phosphoglycerate mutase family protein                     | -0.19 | 0.24  | -0.28 | -1.10 | 0.01  | -1.09 | 0.69  | 0.51  | -0.15 | -0.75 |
| TCA | cassava4.1_007404m.g | TCA / org transformation.TCA.pyruvate DH.E1                | pyruvate dehydrogenase complex E1 alpha subunit            | 0.39  | 0.78  | 0.61  | 1.23  | 0.08  | 1.09  | -0.35 | 0.37  | -0.24 | 0.86  |
|     | cassava4.1_007540m.g | TCA / org transformation.TCA.pyruvate DH.E1                | pyruvate dehydrogenase complex E1 alpha subunit            | 0.48  | 1.00  | 0.34  | 1.07  | -0.12 | 1.74  | -0.31 | 1.07  | -0.08 | 0.81  |
|     | cassava4.1_010116m.g | TCA / org transformation.TCA.pyruvate DH.E1                | Transketolase family protein                               | 0.66  | 1.23  | 0.48  | 1.30  | 0.14  | 0.83  | -0.15 | 0.44  | -0.05 | 0.75  |
|     | cassava4.1_010442m.g | TCA / org transformation.TCA.pyruvate DH.E1                | Transketolase family protein                               | 0.36  | 0.97  | 0.08  | 0.55  | 0.17  | 0.86  | 0.17  | 1.05  | -0.11 | 0.70  |
|     | cassava4.1_004839m.g | TCA / org transformation.TCA.pyruvate DH.E2                | Dihydrolipoamide acetyltransferase, long form protein      | 0.21  | 0.63  | 0.73  | 1.08  | 0.02  | 1.02  | -0.01 | 0.96  | 0.03  | 0.95  |
|     | cassava4.1_004864m.g | TCA / org transformation.TCA.pyruvate DH.E2                | Dihydrolipoamide acetyltransferase, long form protein      | 0.42  | 0.99  | 0.58  | 1.26  | 0.16  | 1.51  | 0.26  | 0.97  | 0.14  | 0.94  |
|     | cassava4.1_006906m.g | TCA / org transformation.TCA.pyruvate DH.E2                | 2-oxoacid dehydrogenases acyltransferase family protein    | -0.20 | 0.55  | 0.10  | 0.52  | 0.18  | 1.10  | -0.75 | 0.56  | -0.09 | 0.63  |
|     | cassava4.1_004342m.g | TCA / org transformation.TCA.pyruvate DH.E3                | lipoamide dehydrogenase 1                                  | 0.13  | 0.84  | 0.15  | 0.91  | 0.16  | 0.87  | -0.53 | 0.94  | 0.24  | 1.48  |
|     | cassava4.1_005856m.g | TCA / org transformation.TCA.pyruvate DH.E3                | mitochondrial lipoamide dehydrogenase 1                    | -0.84 | -1.72 | -0.49 | -0.93 | -0.25 | -0.36 | -0.50 | -1.53 | -0.70 | -1.41 |
|     | cassava4.1_006853m.g | TCA / org transformation.TCA.CS                            | Citrate synthase family protein                            | 0.33  | 0.84  | 0.07  | 0.78  | 0.02  | 0.98  | -0.01 | 0.30  | 0.22  | 0.80  |
|     | cassava4.1_012522m.g | TCA / org transformation.TCA.CS                            | citrate synthase 5                                         | 1.05  | 1.55  | 0.51  | 0.85  | 0.11  | 1.21  | -0.40 | 1.14  | 0.46  | 1.23  |
|     | cassava4.1_000903m.g | TCA / org transformation.TCA.aconitase                     | aconitase 3                                                | 0.69  | 1.54  | 0.62  | 1.52  | -0.02 | 1.43  | 0.27  | 0.57  | -0.13 | 0.60  |
|     | cassava4.1_000908m.g | TCA / org transformation.TCA.aconitase                     | aconitase 3                                                | 0.47  | 0.90  | 0.35  | 0.68  | 0.06  | 0.87  | 0.29  | 0.96  | -0.03 | 0.47  |
|     | cassava4.1_001348m.g | TCA / org transformation.TCA.aconitase                     | aconitase 1                                                | 1.23  | 2.37  | 0.83  | 1.66  | -0.06 | 1.18  | 0.33  | 2.29  | 0.70  | 2.14  |
|     | cassava4.1_005842m.g | TCA / org transformation.TCA.aconitase                     | isopropyl malate isomerase large subunit 1                 | -0.64 | -0.63 | 0.03  | 0.06  | 0.04  | 0.17  | -0.49 | -0.95 | -0.29 | -0.61 |
|     | cassava4.1_005859m.g | TCA / org transformation.TCA.aconitase                     | isopropyl malate isomerase large subunit 1                 | -0.40 | -1.15 | -0.10 | -0.48 | -0.22 | -0.01 | -0.60 | -1.77 | -0.89 | -1.61 |
|     | cassava4.1_033921m.g | TCA / org transformation.TCA.aconitase                     | aconitase 3                                                | -0.36 | 1.59  | -1.73 | -0.89 | -0.93 | 2.23  | 2.08  | 2.78  | 0.17  | 2.85  |



|               |                      |                                                                                 |                                                              |       |       |       |       |       |       |       |       |       |       |
|---------------|----------------------|---------------------------------------------------------------------------------|--------------------------------------------------------------|-------|-------|-------|-------|-------|-------|-------|-------|-------|-------|
|               | cassava4.1_007405m.g | TCA / org transformation.TCA.IDH                                                | Isocitrate/isopropylmalate dehydrogenase family protein      | -0.24 | 0.17  | 0.13  | 0.63  | 0.32  | 1.11  | -0.40 | 1.87  | 0.21  | 1.84  |
|               | cassava4.1_009195m.g | TCA / org transformation.TCA.IDH                                                | cytosolic NADP+-dependent isocitrate dehydrogenase           | 1.58  | 2.52  | 0.97  | 2.08  | 0.18  | 2.63  | -0.23 | 1.87  | 0.56  | 2.60  |
|               | cassava4.1_009952m.g | TCA / org transformation.TCA.IDH                                                | isocitrate dehydrogenase III                                 | 0.68  | 0.43  | 0.47  | 0.68  | 0.05  | 0.83  | -0.26 | 0.58  | 0.00  | 0.90  |
|               | cassava4.1_008387m.g | TCA / org transformation.TCA.succinyl-CoA ligase                                | ATP citrate lyase (ACL) family protein                       | 0.25  | 0.56  | 0.21  | 0.85  | -0.04 | 1.22  | -0.17 | 0.41  | -0.03 | 0.53  |
|               | cassava4.1_010959m.g | TCA / org transformation.TCA.succinyl-CoA ligase                                | Succinyl-CoA ligase, alpha subunit                           | 0.41  | 0.85  | 0.19  | 0.89  | 0.14  | 1.11  | -0.38 | 1.17  | 0.53  | 1.58  |
|               | cassava4.1_034079m.g | TCA / org transformation.TCA.succinyl-CoA ligase                                | Succinyl-CoA ligase, alpha subunit                           | 0.20  | 0.67  | -0.06 | 0.55  | 0.53  | 1.41  | -0.70 | 1.42  | -0.13 | 1.29  |
|               | cassava4.1_003519m.g | TCA / org transformation.TCA.succinate dehydrogenase                            | succinate dehydrogenase 1-1                                  | -0.41 | -0.23 | -0.23 | -0.02 | -0.07 | 0.88  | -0.04 | -0.03 | -0.19 | 0.21  |
|               | cassava4.1_013361m.g | TCA / org transformation.TCA.succinate dehydrogenase                            | succinate dehydrogenase 2-2                                  | 0.65  | 0.76  | 0.41  | 0.78  | 0.19  | 1.20  | -0.22 | 1.24  | 0.23  | 0.86  |
|               | cassava4.1_034460m.g | TCA / org transformation.TCA.malate DH                                          | malate dehydrogenase                                         | 0.57  | 0.77  | 0.02  | 0.46  | 0.08  | 1.44  | -1.19 | 1.01  | -0.62 | 0.76  |
|               | cassava4.1_013362m.g | TCA / org transformation.TCA.succinate dehydrogenase                            | succinate dehydrogenase 2-2                                  | 0.75  | 1.51  | 0.12  | 0.50  | 0.09  | 1.34  | 0.69  | 1.40  | -0.38 | 0.73  |
|               | cassava4.1_011133m.g | TCA / org transformation.TCA.malate DH                                          | Lactate/malate dehydrogenase family protein                  | -0.02 | 0.10  | 0.25  | 0.63  | 0.13  | 1.04  | -0.36 | 0.30  | -0.43 | 0.13  |
| mitochondrial | cassava4.1_010822m.g | mitochondrial electron transport / ATP synthesis.alternative oxidase            | alternative oxidase 2                                        | -0.41 | -0.90 | -0.19 | -0.58 | -0.04 | -0.40 | 0.08  | -0.56 | -0.49 | -0.72 |
| electron      | cassava4.1_027944m.g | mitochondrial electron transport / ATP synthesis.cytochrome c                   | transmembrane protein G1P-related 1                          | -0.37 | -0.03 | 0.13  | 0.25  | 0.30  | 1.39  | -0.97 | 0.52  | -0.94 | -0.02 |
| transport     | cassava4.1_010184m.g | mitochondrial electron transport / ATP synthesis.NADH-DH.type II.mitochondrial  | NAD(P)H dehydrogenase C1                                     | -0.33 | -1.00 | -0.57 | -0.62 | 0.08  | -0.55 | -0.39 | -0.69 | -0.34 | -0.86 |
|               | cassava4.1_016672m.g | mitochondrial electron transport / ATP synthesis.NADH-DH.complex I              | NADPH:quinone oxidoreductase                                 | -0.21 | -1.50 | -0.44 | -1.10 | -0.13 | -0.25 | -0.20 | -0.25 | -0.46 | -0.32 |
|               | cassava4.1_013530m.g | mitochondrial electron transport / ATP synthesis.cytochrome c reductase         | Ubiquinol-cytochrome C reductase iron-sulfur subunit         | -0.06 | 0.01  | -0.05 | 0.25  | 0.04  | 0.93  | -0.45 | -0.60 | -0.62 | -0.21 |
|               | cassava4.1_017064m.g | mitochondrial electron transport / ATP synthesis.cytochrome c oxidase           | cytochrome C oxidase 6B                                      | -0.05 | -0.15 | -0.13 | 0.16  | -0.02 | 0.90  | -0.33 | 0.77  | -0.01 | 0.56  |
|               | cassava4.1_002356m.g | mitochondrial electron transport / ATP synthesis.NADH-DH.localisation not clear | NADH-ubiquinone dehydrogenase, mitochondrial, putative       | 0.04  | -0.08 | 0.12  | 0.12  | 0.09  | 0.86  | -0.03 | 0.23  | -0.20 | 0.03  |
|               | cassava4.1_012361m.g | mitochondrial electron transport / ATP synthesis.cytochrome c reductase         | Ubiquinol-cytochrome C reductase iron-sulfur subunit         | 0.05  | 0.13  | 0.11  | 0.35  | 0.00  | 1.22  | -0.02 | 0.22  | -0.28 | 0.16  |
|               | cassava4.1_004343m.g | mitochondrial electron transport / ATP synthesis.NADH-DH.type II.external       | NAD(P)H dehydrogenase B1                                     | 0.11  | -0.03 | 0.17  | -0.23 | -0.01 | -0.21 | 0.17  | -0.31 | -0.38 | -0.77 |
|               | cassava4.1_013140m.g | mitochondrial electron transport / ATP synthesis.cytochrome c oxidase           | unknow                                                       | 0.11  | 0.08  | 0.06  | -0.49 | 0.20  | -1.11 | -0.38 | 0.11  | -0.32 | -0.37 |
|               | cassava4.1_004630m.g | mitochondrial electron transport / ATP synthesis.F1-ATPase                      | ATP synthase alpha/beta family protein                       | 0.13  | 0.32  | 0.16  | 0.52  | 0.10  | 1.03  | -0.51 | 0.56  | -0.03 | 0.68  |
|               | cassava4.1_016028m.g | mitochondrial electron transport / ATP synthesis.NADH-DH.localisation not clear | NADH-ubiquinone oxidoreductase 20 kDa subunit, mitochondrial | 0.14  | -0.10 | 0.08  | 0.33  | 0.03  | 1.14  | -0.01 | -0.09 | -0.16 | 0.23  |
|               | cassava4.1_013120m.g | mitochondrial electron transport / ATP synthesis.NADH-DH.complex I              | prohibitin 6                                                 | 0.15  | 0.68  | 0.20  | 0.82  | 0.18  | 1.12  | -0.69 | 1.61  | -0.10 | 1.16  |
|               | cassava4.1_017764m.g | mitochondrial electron transport / ATP synthesis.cytochrome c oxidase           | Rubredoxin-like superfamily protein                          | 0.16  | 0.01  | 0.19  | 0.57  | 0.03  | 0.98  | -0.20 | 0.22  | 0.18  | 0.85  |

|                      |                                                                                       |                                                                 |      |      |       |      |       |      |       |      |       |      |
|----------------------|---------------------------------------------------------------------------------------|-----------------------------------------------------------------|------|------|-------|------|-------|------|-------|------|-------|------|
| cassava4.1_017840m.g | mitochondrial electron transport / ATP synthesis.NADH-DH.localisation not clear       | NADH-ubiquinone oxidoreductase-related                          | 0.17 | 0.78 | 0.10  | 0.88 | 0.28  | 1.34 | -0.25 | 1.51 | -0.19 | 1.41 |
| cassava4.1_019324m.g | mitochondrial electron transport / ATP synthesis.F1-ATPase                            | Mitochondrial ATP synthase subunit G protein                    | 0.19 | 0.85 | 0.46  | 0.91 | 0.15  | 1.41 | -0.14 | 0.81 | -0.10 | 0.51 |
| cassava4.1_014720m.g | mitochondrial electron transport / ATP synthesis.NADH-DH.complex I.carbonic anhydrase | gamma carbonic anhydrase like 1                                 | 0.19 | 0.22 | 0.15  | 0.42 | -0.09 | 1.10 | -0.23 | 1.19 | 0.25  | 1.20 |
| cassava4.1_004726m.g | mitochondrial electron transport / ATP synthesis.F1-ATPase                            | ATP synthase alpha/beta family protein                          | 0.20 | 0.53 | 0.23  | 0.63 | 0.01  | 0.97 | -0.07 | 0.38 | -0.08 | 0.38 |
| cassava4.1_014473m.g | mitochondrial electron transport / ATP synthesis.NADH-DH.localisation not clear       | NADH-ubiquinone oxidoreductase 24 kDa subunit, putative         | 0.23 | 0.28 | 0.22  | 0.58 | 0.22  | 0.92 | -0.31 | 0.79 | 0.06  | 0.82 |
| cassava4.1_012332m.g | mitochondrial electron transport / ATP synthesis.NADH-DH.localisation not clear       | NADH-ubiquinone oxidoreductase 24 kDa subunit, putative         | 0.24 | 0.52 | 0.28  | 0.55 | -0.26 | 0.60 | -0.45 | 0.59 | 0.05  | 0.89 |
| cassava4.1_020733m.g | mitochondrial electron transport / ATP synthesis.F1-ATPase                            | ATP synthase epsilon chain, mitochondrial                       | 0.25 | 0.53 | 0.10  | 0.66 | 0.20  | 1.21 | -0.24 | 1.19 | 0.09  | 1.24 |
| cassava4.1_019319m.g | mitochondrial electron transport / ATP synthesis.F1-ATPase                            | Mitochondrial ATP synthase subunit G protein                    | 0.27 | 0.76 | 0.36  | 0.95 | 0.02  | 1.03 | -0.43 | 0.29 | 0.00  | 0.39 |
| cassava4.1_016505m.g | mitochondrial electron transport / ATP synthesis.cytochrome c oxidase                 | electron transport SCO1/SenC family protein                     | 0.28 | 1.11 | 0.02  | 0.54 | 0.00  | 0.79 | -0.26 | 2.22 | 0.44  | 1.67 |
| cassava4.1_013823m.g | mitochondrial electron transport / ATP synthesis.NADH-DH.complex I.carbonic anhydrase | gamma carbonic anhydrase 1                                      | 0.29 | 0.52 | 0.40  | 0.55 | -0.14 | 0.91 | -0.31 | 0.76 | -0.12 | 0.61 |
| cassava4.1_014599m.g | mitochondrial electron transport / ATP synthesis.electron transfer flavoprotein       | electron transfer flavoprotein beta                             | 0.29 | 0.87 | -0.09 | 0.26 | 0.19  | 0.32 | 0.36  | 1.71 | -0.04 | 0.80 |
| cassava4.1_017212m.g | mitochondrial electron transport / ATP synthesis.cytochrome c oxidase                 | cytochrome C oxidase 6B                                         | 0.29 | 0.88 | 0.28  | 1.03 | -0.26 | 1.05 | -1.02 | 0.76 | 0.47  | 1.75 |
| cassava4.1_019654m.g | mitochondrial electron transport / ATP synthesis.cytochrome c                         | cytochrome c-2                                                  | 0.31 | 0.55 | 0.77  | 1.50 | 0.05  | 1.84 | 0.05  | 1.79 | 0.10  | 1.30 |
| cassava4.1_020694m.g | mitochondrial electron transport / ATP synthesis.cytochrome c reductase               | Cytochrome b-c1 complex, subunit 8 protein                      | 0.31 | 0.50 | 0.18  | 0.61 | 0.09  | 1.10 | -0.46 | 0.68 | -0.21 | 0.55 |
| cassava4.1_006409m.g | mitochondrial electron transport / ATP synthesis.F1-ATPase                            | ATPase, V1 complex, subunit B protein                           | 0.32 | 0.86 | 0.45  | 1.01 | 0.19  | 0.75 | -0.72 | 0.69 | -0.14 | 0.78 |
| cassava4.1_017771m.g | mitochondrial electron transport / ATP synthesis.F1-ATPase                            | ATP synthase D chain, mitochondrial                             | 0.33 | 0.91 | 0.31  | 0.77 | 0.10  | 1.06 | -0.13 | 0.86 | -0.26 | 0.57 |
| cassava4.1_006064m.g | mitochondrial electron transport / ATP synthesis.NADH-DH.type II.internal matrix      | alternative NAD(P)H dehydrogenase 2                             | 0.33 | 0.28 | 0.50  | 0.56 | -0.06 | 0.02 | 0.19  | 0.54 | 0.57  | 1.26 |
| cassava4.1_019945m.g | mitochondrial electron transport / ATP synthesis.cytochrome c oxidase                 | cytochrome c oxidase-related                                    | 0.40 | 0.40 | 0.06  | 0.56 | -0.03 | 1.29 | -0.61 | 0.68 | -0.22 | 0.87 |
| cassava4.1_013108m.g | mitochondrial electron transport / ATP synthesis.NADH-DH.complex I                    | prohibitin 1                                                    | 0.41 | 0.83 | 0.20  | 0.68 | 0.17  | 1.04 | -0.78 | 2.39 | 0.29  | 2.03 |
| cassava4.1_014824m.g | mitochondrial electron transport / ATP synthesis.uncoupling protein                   | plant uncoupling mitochondrial protein 1                        | 0.43 | 1.05 | 0.10  | 0.94 | 0.43  | 1.26 | -0.23 | 1.37 | -0.08 | 1.07 |
| cassava4.1_020696m.g | mitochondrial electron transport / ATP synthesis.cytochrome c reductase               | ubiquinol-cytochrome C reductase UQCRX/QCR9-like family protein | 0.43 | 0.68 | 0.39  | 0.90 | -0.06 | 0.81 | -0.58 | 0.78 | 0.12  | 1.15 |

|              |                      |                                                                                           |                                                          |      |       |       |       |       |       |       |      |       |       |
|--------------|----------------------|-------------------------------------------------------------------------------------------|----------------------------------------------------------|------|-------|-------|-------|-------|-------|-------|------|-------|-------|
|              | cassava4.1_016521m.g | mitochondrial electron transport / ATP synthesis.F1-ATPase                                | ATPase, F1 complex, delta/epsilon subunit                | 0.45 | 0.75  | 0.25  | 0.67  | 0.17  | 1.50  | -0.16 | 0.67 | -0.24 | 0.50  |
|              | cassava4.1_019932m.g | mitochondrial electron transport / ATP synthesis.NADH-DH.localisation not clear           | NADH-ubiquinone oxidoreductase B18 subunit, putative     | 0.47 | 0.59  | 0.20  | 0.76  | 0.10  | 1.16  | -0.49 | 0.83 | -0.06 | 1.14  |
|              | cassava4.1_013697m.g | mitochondrial electron transport / ATP synthesis.cytochrome c reductase                   | Ubiquinol-cytochrome C reductase iron-sulfur subunit     | 0.47 | 0.80  | 0.58  | 0.70  | 0.23  | 1.35  | -0.70 | 0.79 | -0.01 | 1.01  |
|              | cassava4.1_019624m.g | mitochondrial electron transport / ATP synthesis.cytochrome c                             | cytochrome c-2                                           | 0.49 | 0.70  | 0.64  | 1.30  | -0.15 | 1.98  | -0.98 | 0.33 | -0.21 | 0.92  |
|              | cassava4.1_010295m.g | mitochondrial electron transport / ATP synthesis.cytochrome c oxidase                     | Surfeit locus 1 cytochrome c oxidase biogenesis protein  | 0.54 | 0.91  | 0.03  | 0.74  | 0.04  | 1.07  | 0.18  | 1.42 | -0.39 | 1.13  |
|              | cassava4.1_005184m.g | mitochondrial electron transport / ATP synthesis.NADH-DH.type II.internal matrix          | alternative NAD(P)H dehydrogenase 1                      | 0.63 | 0.83  | 0.18  | 0.86  | -0.04 | 1.31  | -1.26 | 0.78 | -0.56 | 1.20  |
|              | cassava4.1_010697m.g | mitochondrial electron transport / ATP synthesis.electron transfer flavoprotein           | electron transfer flavoprotein alpha                     | 0.68 | 1.39  | 0.07  | 0.42  | 0.04  | 1.04  | -0.17 | 1.30 | 0.17  | 1.09  |
|              | cassava4.1_004741m.g | mitochondrial electron transport / ATP synthesis.NADH-DH.type II.external                 | NAD(P)H dehydrogenase B2                                 | 0.70 | 0.30  | -0.18 | -0.14 | 0.06  | 0.80  | 0.03  | 1.86 | -0.76 | -1.18 |
|              | cassava4.1_019695m.g | mitochondrial electron transport / ATP synthesis.NADH-DH.localisation not clear           | NADH:ubiquinone oxidoreductase, 17.2kDa subunit          | 0.74 | 0.44  | -0.29 | 1.05  | 0.09  | 1.30  | 0.33  | 1.39 | 1.09  | 2.14  |
|              | cassava4.1_009351m.g | transport.metabolite transporters at the mitochondrial membrane                           | ADP/ATP carrier 2                                        | 0.37 | 0.51  | 0.51  | 0.89  | 0.19  | 0.90  | -0.93 | 0.04 | -0.10 | 0.59  |
|              | cassava4.1_009354m.g | transport.metabolite transporters at the mitochondrial membrane                           | ADP/ATP carrier 2                                        | 0.10 | 0.40  | 0.84  | 1.56  | 0.07  | 1.81  | -0.65 | 0.37 | -0.12 | 1.03  |
|              | cassava4.1_011745m.g | transport.metabolite transporters at the mitochondrial membrane                           | uncoupling protein 5                                     | 0.38 | -1.46 | 1.75  | 1.08  | 0.41  | 0.44  | -2.26 | 0.12 | 0.62  | -0.48 |
|              | cassava4.1_023265m.g | mitochondrial electron transport / ATP synthesis.electron transfer flavoprotein           | electron-transfer flavoprotein:ubiquinone oxidoreductase | 0.80 | 1.67  | 0.52  | 0.56  | 0.00  | 0.40  | 0.68  | 1.28 | 0.44  | 0.80  |
|              | cassava4.1_017914m.g | mitochondrial electron transport / ATP synthesis.cytochrome c oxidase                     | Rubredoxin-like superfamily protein                      | 0.81 | 0.75  | 0.85  | 1.22  | 0.08  | 1.42  | -0.01 | 1.34 | 0.57  | 1.60  |
|              | cassava4.1_014864m.g | mitochondrial electron transport / ATP synthesis.NADH-DH.localisation not clear           | DERLIN-1                                                 | 0.85 | 0.79  | 0.48  | 0.50  | -0.10 | -0.02 | 1.63  | 1.17 | 0.35  | 0.37  |
| Flavonoid    | cassava4.1_004658m.g | 4CL3; 4-coumarate-CoA ligase                                                              | 4-coumarate:CoA ligase 3                                 | 0.27 | 1.03  | 1.04  | 3.06  | -0.39 | 4.68  | -0.15 | 0.91 | -0.12 | 2.48  |
| Biosynthetic | cassava4.1_000031m.g | lipid metabolism.FA synthesis and FA elongation.Acetyl CoA Carboxylation.homomeric Enzyme | acetyl-CoA carboxylase 1 (ACC1)                          | 0.82 | 2.10  | 0.61  | 2.16  | 0.23  | 2.20  | 1.30  | 1.60 | 0.43  | 1.85  |
|              | cassava4.1_000041m.g | lipid metabolism.FA synthesis and FA elongation.Acetyl CoA Carboxylation.homomeric Enzyme | acetyl-CoA carboxylase 1 (ACC1)                          | 0.47 | 1.49  | 0.67  | 1.92  | -0.11 | 2.21  | 0.92  | 0.34 | -0.07 | 0.76  |
|              | cassava4.1_010685m.g | secondary metabolism.flavonoids.dihydroflavonols.dihydroflavonol 4-reductase              | dihydroflavonol 4-reductase (DFR)                        | 2.65 | 4.49  | 4.37  | 6.95  | 0.50  | 7.40  | -2.31 | 6.64 | 4.10  | 9.30  |
|              | cassava4.1_010212m.g | hormone metabolism.ethylene.synthesis-degradation                                         | flavanone 3-hydroxylase (F3H)                            | 3.44 | 5.05  | 4.32  | 6.42  | 0.20  | 7.71  | -1.61 | 5.35 | 2.87  | 7.69  |
|              | cassava4.1_011534m.g | hormone metabolism.ethylene.synthesis-degradation                                         | flavonol synthase 1 (FLS1)                               | 1.37 | 2.75  | 2.59  | 4.59  | 0.17  | 4.60  | -1.49 | 3.55 | 1.09  | 5.63  |

|            |                      |                                                                        |                                       |       |      |      |      |       |      |       |       |       |       |
|------------|----------------------|------------------------------------------------------------------------|---------------------------------------|-------|------|------|------|-------|------|-------|-------|-------|-------|
|            | cassava4.1_010809m.g | hormone metabolism.ethylene.synthesis-degradation                      | leucoanthocyanidin dioxygenase (LDOX) | 2.38  | 3.20 | 4.43 | 6.31 | 0.34  | 7.60 | -3.74 | 5.40  | 3.36  | 8.59  |
|            | cassava4.1_008985m.g | RNA.regulation of transcription.MYB domain transcription factor family | myb domain protein 111 (MYB111)       | 0.98  | 0.80 | 1.32 | 0.68 | -0.78 | 1.73 | 0.32  | 2.04  | 1.28  | 2.27  |
|            | cassava4.1_009295m.g | secondary metabolism.flavonoids.chalcones                              | TRANSPARENT TESTA 4 (TT4)             | 1.62  | 4.03 | 2.37 | 5.46 | 0.40  | 7.37 | -1.77 | 3.38  | 0.61  | 5.50  |
|            | cassava4.1_009206m.g | secondary metabolism.flavonoids.chalcones                              | TRANSPARENT TESTA 4 (TT4)             | 2.51  | 4.35 | 3.43 | 5.94 | -0.08 | 7.97 | -3.30 | 2.01  | 1.86  | 6.09  |
|            | cassava4.1_009402m.g | secondary metabolism.flavonoids.chalcones                              | TRANSPARENT TESTA 4 (TT4)             | 3.06  | 4.46 | 5.26 | 7.21 | 0.46  | 7.99 | -4.08 | 5.66  | 3.89  | 9.29  |
|            | cassava4.1_007396m.g | secondary metabolism.flavonoids.chalcones                              | TRANSPARENT TESTA 5 (TT5)             | 1.03  | 2.27 | 1.20 | 3.03 | 0.22  | 3.56 | -0.77 | 1.59  | 0.38  | 3.56  |
|            | cassava4.1_005974m.g | misc.cytochrome P450                                                   | TRANSPARENT TESTA 7 (TT7);            | 1.93  | 2.73 | 4.94 | 6.92 | 0.33  | 7.79 | -0.59 | 7.22  | 3.54  | 8.89  |
|            | cassava4.1_005668m.g | misc.cytochrome P450                                                   | TRANSPARENT TESTA 7 (TT7);            | 2.19  | 3.84 | 1.94 | 4.34 | 0.22  | 4.54 | -1.83 | 1.75  | 0.96  | 4.59  |
| cytochrome | cassava4.1_018938m.g | cytochrome                                                             | cytochrome B5 isoform E               | 1.27  | 2.19 | 0.34 | 0.76 | 0.08  | 1.14 | 0.37  | -0.21 | -0.33 | 0.27  |
| B5         | cassava4.1_018863m.g | cytochrome                                                             | cytochrome B5 isoform B               | -0.15 | 0.04 | 0.09 | 0.78 | -0.03 | 0.92 | -0.45 | -0.31 | -0.59 | -0.42 |
|            | cassava4.1_018955m.g | cytochrome                                                             | cytochrome B5 isoform B               | 0.61  | 1.02 | 0.44 | 1.10 | 0.29  | 0.98 | -1.22 | 0.58  | -0.31 | 1.12  |
|            | cassava4.1_018882m.g | cytochrome                                                             | cytochrome B5 isoform B               | 0.31  | 0.63 | 0.21 | 0.64 | -0.28 | 1.38 | -0.79 | 0.34  | -0.53 | 0.57  |
|            | cassava4.1_018854m.g | cytochrome                                                             | cytochrome B5 isoform B               | 0.94  | 1.65 | 0.89 | 1.30 | 0.14  | 2.17 | -1.38 | 0.52  | -0.22 | 0.53  |
|            | cassava4.1_027275m.g | cytochrome                                                             | cytochrome B5 isoform D               | 2.85  | 4.14 | 4.58 | 6.77 | 0.61  | 8.35 | -3.19 | 4.41  | 2.94  | 7.91  |

**Supplemental Table S6. Genes annotated to starch and sucrose metabolism related genes. The extent of differential expression is measured in terms of log2 fold change of treatment vs. control.**

| Cassava ID           | Mapman Category                                              | Short Description                                                                                                                                                              | PG0     | FG0   | PG2   | FG2   | PG4    | FG4   | PG0   | FG0   | PG2   | FG2   |
|----------------------|--------------------------------------------------------------|--------------------------------------------------------------------------------------------------------------------------------------------------------------------------------|---------|-------|-------|-------|--------|-------|-------|-------|-------|-------|
|                      |                                                              |                                                                                                                                                                                | 120 day |       |       |       | 45 day |       |       |       |       |       |
| cassava4.1_005409m.g | major CHO metabolism.synthesis.starch.AGPase                 | glucose-1-phosphate adenyltransferase                                                                                                                                          | 2.31    | 3.39  | 1.70  | 2.76  | 0.32   | 2.01  | 0.24  | 3.35  | 0.84  | 2.53  |
| cassava4.1_005518m.g | major CHO metabolism.synthesis.starch.AGPase                 | glucose-1-phosphate adenyltransferase                                                                                                                                          | 2.71    | 3.05  | 2.11  | 2.82  | 0.31   | 1.22  | -0.77 | 4.41  | 1.46  | 3.81  |
| cassava4.1_021267m.g | major CHO metabolism.synthesis.starch.AGPase                 | highly similar to ( 674) AT1G27680   Symbols: APL2   APL2 (ADPGLC-PPASE LARGE SUBUNIT); glucose-1-phosphate adenyltransferase                                                  | 0.03    | 0.53  | 0.90  | 1.59  | -0.23  | 1.05  | -0.36 | 1.92  | -0.03 | 2.26  |
| cassava4.1_005507m.g | major CHO metabolism.synthesis.starch.AGPase                 | highly similar to ( 855) AT5G19220   Symbols: ADG2, APL1   APL1 (ADP GLUCOSE PYROPHOSPHORYLASE LARGE SUBUNIT 1); glucose-1-phosphate adenyltransferase                         | -0.91   | -2.90 | -0.19 | -2.72 | -0.02  | -3.77 | -0.30 | -2.39 | -0.62 | -2.70 |
| cassava4.1_002278m.g | major CHO metabolism.synthesis.starch.starch synthase        | nearly identical (1009) AT3G01180   Symbols: AtSS2   AtSS2 (starch synthase 2); transferase, transferring glycosyl groups                                                      | -0.07   | -1.64 | 0.03  | -1.41 | -0.12  | -0.89 | 0.03  | -1.26 | -0.43 | -1.66 |
| cassava4.1_003884m.g | major CHO metabolism.synthesis.starch.starch synthase        | highly similar to ( 894) AT1G32900   Symbols:   starch synthase, putative                                                                                                      | -0.97   | -2.77 | -0.01 | -1.37 | -0.05  | -1.30 | -0.69 | -2.18 | -0.75 | -2.68 |
| cassava4.1_004619m.g | major CHO metabolism.synthesis.starch.starch synthase        | highly similar to ( 885) AT5G24300   Symbols: SS1, SS1, ATSS1   SS1 (SUPPRESSOR OF SALICYLIC ACID INSENSITIVITY 1); starch synthase/ transferase, transferring glycosyl groups | -0.28   | -0.12 | -0.35 | -0.84 | -0.13  | -0.72 | 0.20  | -0.33 | -0.22 | -0.59 |
| cassava4.1_001595m.g | major CHO metabolism.synthesis.starch.starch branching       | highly similar to ( 832) AT5G03650   Symbols: SBE2.2   SBE2.2 (starch branching enzyme 2.2); 1,4-alpha-glucan branching enzyme                                                 | 0.29    | 0.88  | 0.69  | 0.97  | 0.14   | 1.17  | -0.33 | 1.72  | 0.44  | 1.79  |
| cassava4.1_001686m.g | major CHO metabolism.synthesis.starch.starch branching       | nearly identical (1303) AT5G03650   Symbols: SBE2.2   SBE2.2 (starch branching enzyme 2.2); 1,4-alpha-glucan branching enzyme                                                  | 0.54    | 0.71  | 0.84  | 1.05  | 0.17   | 0.11  | 0.42  | 1.71  | 0.26  | 1.08  |
| cassava4.1_003773m.g | major CHO metabolism.synthesis.starch.starch branching       | nearly identical (1128) AT5G03650   Symbols: SBE2.2   SBE2.2 (starch branching enzyme 2.2); 1,4-alpha-glucan branching enzyme                                                  | 0.91    | 1.42  | 1.05  | 1.23  | 0.30   | 0.24  | 0.40  | 3.40  | 0.95  | 2.50  |
| cassava4.1_001096m.g | major CHO metabolism.degradation.starch.starch phosphorylase | nearly identical (1369) AT3G29320   Symbols:   glucan phosphorylase, putative                                                                                                  | -0.51   | -1.13 | 0.24  | -0.55 | -0.13  | -1.71 | -0.56 | 0.01  | -0.19 | 0.37  |

|                      |                                                                       |                                                                                                                                                          |       |       |       |       |       |       |       |       |       |       |
|----------------------|-----------------------------------------------------------------------|----------------------------------------------------------------------------------------------------------------------------------------------------------|-------|-------|-------|-------|-------|-------|-------|-------|-------|-------|
| cassava4.1_001626m.g | major CHO metabolism.degradation.starch.starch phosphorylase          | nearly identical (1470) AT3G46970   Symbols: ATPHS2, PHS2   PHS2 (ALPHA-GLUCAN PHOSPHORYLASE 2); phosphorylase/transferase, transferring glycosyl groups | 1.46  | 2.17  | 1.48  | 2.15  | 0.27  | 1.10  | 0.01  | 3.01  | 0.71  | 2.66  |
| cassava4.1_002466m.g | major CHO metabolism.degradation.starch.starch phosphorylase          | highly similar to ( 778) AT3G29320   Symbols:   glucan phosphorylase, putative                                                                           | 1.23  | 2.09  | 0.71  | 1.42  | 0.35  | 0.98  | -0.86 | 2.88  | 0.77  | 2.93  |
| cassava4.1_002614m.g | major CHO metabolism.degradation.starch.starch phosphorylase          | highly similar to ( 764) AT3G29320   Symbols:   glucan phosphorylase, putative                                                                           | 0.69  | 1.54  | 0.76  | 1.07  | 0.36  | 1.00  | 0.06  | 3.77  | 0.67  | 3.12  |
| cassava4.1_004717m.g | major CHO metabolism.degradation.starch.starch phosphorylase          | highly similar to ( 739) AT3G29320   Symbols:   glucan phosphorylase, putative                                                                           | 0.97  | 1.94  | 1.17  | 1.54  | 0.30  | 1.02  | -0.18 | 3.45  | 0.33  | 2.64  |
| cassava4.1_000266m.g | major CHO metabolism.degradation.starch.glucan water dikinase         | nearly identical (1917) AT1G10760   Symbols: SEX1, SOP1, SOP, GWD1, GWD   SEX1 (STARCH EXCESS 1); alpha-glucan, water dikinase                           | 0.44  | 1.31  | 0.79  | 1.82  | 0.08  | 1.53  | 0.26  | 1.29  | 0.82  | 1.72  |
| cassava4.1_000497m.g | major CHO metabolism.degradation.starch.glucan water dikinase         | nearly identical (1490) AT5G26570   Symbols: PWD, OK1, ATGWD3   ATGWD3; carbohydrate kinase/ catalytic/ phosphoglucan, water dikinase                    | 0.24  | 0.69  | 0.15  | -0.28 | 0.06  | -0.54 | 0.51  | 0.86  | 0.18  | -0.13 |
| cassava4.1_006053m.g | major CHO metabolism.degradation.starch.starch cleavage               | highly similar to ( 627) AT5G11720   Symbols:   alpha-glucosidase 1 (AGLU1)                                                                              | 0.52  | 0.93  | -0.20 | 0.26  | 0.32  | 1.93  | 1.18  | 2.60  | 1.44  | 2.90  |
| cassava4.1_001362m.g | major CHO metabolism.degradation.starch.starch cleavage.alpha amylase | nearly identical (1236) AT1G69830   Symbols: ATAMY3, AMY3   AMY3 (ALPHA-AMYLASE-LIKE 3); alpha-amylase                                                   | 0.70  | 1.27  | -0.63 | -0.31 | -0.12 | -0.95 | 0.60  | 0.15  | -0.27 | -0.47 |
| cassava4.1_008754m.g | major CHO metabolism.degradation.starch.starch cleavage.alpha amylase | highly similar to ( 708) AT1G76130   Symbols: ATAMY2, AMY2   AMY2 (ALPHA-AMYLASE-LIKE 2); alpha-amylase/ calcium ion binding / catalytic/ cation binding | 0.81  | 1.47  | 0.41  | 1.18  | -0.08 | 1.47  | -0.66 | 0.85  | -0.57 | 0.50  |
| cassava4.1_004345m.g | major CHO metabolism.degradation.starch.starch cleavage.beta amylase  | highly similar to ( 876) AT3G23920   Symbols: BAM1, BMY7, TR-BAMY   BAM1 (BETA-AMYLASE 1); beta-amylase                                                  | -0.12 | -1.15 | -0.12 | -1.58 | -0.09 | -0.50 | 0.99  | 0.08  | -0.42 | -1.12 |
| cassava4.1_005239m.g | major CHO metabolism.degradation.starch.starch cleavage.beta amylase  | highly similar to ( 582) AT5G18670   Symbols: BMY3, BAM9   BMY3; beta-amylase/ catalytic/ cation binding                                                 | -0.53 | -1.42 | -0.50 | -0.53 | -0.01 | -0.05 | 0.34  | -1.18 | -1.00 | -1.80 |
| cassava4.1_032401m.g | major CHO metabolism.degradation.starch.starch cleavage.beta amylase  | moderately similar to ( 376) AT4G17090   Symbols: CT-BMY, BAM3, BMY8   CT-BMY (CHLOROPLAST BETA-AMYLASE);                                                | 1.26  | 1.94  | 2.31  | 3.67  | 0.49  | 1.89  | 1.48  | 3.47  | 0.04  | 2.71  |

|                      |                                                                      |                                                                                                                                                                       |       |       |       |       |       |       |       |       |       |       |
|----------------------|----------------------------------------------------------------------|-----------------------------------------------------------------------------------------------------------------------------------------------------------------------|-------|-------|-------|-------|-------|-------|-------|-------|-------|-------|
|                      |                                                                      | beta-amylase                                                                                                                                                          |       |       |       |       |       |       |       |       |       |       |
| cassava4.1_034364m.g | major CHO metabolism.degradation.starch.starch cleavage.beta amylase | moderately similar to ( 332) AT4G17090   Symbols: CT-BMY, BAM3, BMY8   CT-BMY (CHLOROPLAST BETA-AMYLASE)                                                              | -0.66 | -2.41 | -0.36 | -1.30 | -0.07 | -1.25 | -0.65 | -1.33 | -0.59 | -2.20 |
| cassava4.1_008825m.g | transport.metabolite transporters at the envelope membrane           | highly similar to ( 573) AT5G46110   Symbols: APE2, TPT   APE2 (ACCLIMATION OF PHOTOSYNTHESIS TO ENVIRONMENT 2)                                                       | -0.64 | -2.09 | -0.28 | -1.28 | -0.06 | -1.55 | -0.38 | -1.88 | -0.61 | -1.85 |
| cassava4.1_000732m.g | major CHO metabolism.synthesis.sucrose.SPS                           | nearly identical (1669) AT5G20280   Symbols: ATSPS1F   ATSPS1F (sucrose phosphate synthase 1F)                                                                        | 0.08  | 1.35  | 0.12  | 0.15  | 0.05  | -0.06 | 0.44  | -0.22 | -0.05 | -0.21 |
| cassava4.1_000827m.g | major CHO metabolism.synthesis.sucrose.SPS                           | nearly identical (1521) AT4G10120   Symbols: ATSPS4F   ATSPS4F; transferase, transferring glycosyl groups                                                             | -0.20 | -0.52 | 0.00  | -0.13 | 0.18  | -1.18 | 0.45  | 0.94  | 0.62  | 0.72  |
| cassava4.1_000839m.g | major CHO metabolism.synthesis.sucrose.SPS                           | nearly identical (1527) AT4G10120   Symbols: ATSPS4F   ATSPS4F; transferase, transferring glycosyl groups                                                             | -0.84 | -2.25 | -0.43 | -1.12 | -0.26 | -1.93 | -0.34 | -2.64 | -0.11 | -2.10 |
| cassava4.1_024105m.g | major CHO metabolism.synthesis.sucrose.SPS                           | nearly identical (1583) AT1G04920   Symbols: ATSPS3F   ATSPS3F (sucrose phosphate synthase 3F); sucrose-phosphate synthase/ transferase, transferring glycosyl groups | -0.20 | -2.22 | 0.00  | -1.85 | -0.30 | -3.28 | 0.41  | -2.17 | -0.35 | -2.22 |
| cassava4.1_008177m.g | major CHO metabolism.synthesis.sucrose.SPP                           | highly similar to ( 621) AT2G35840   Symbols:   sucrose-phosphatase 1 (SPP1)                                                                                          | 0.23  | 0.14  | 0.18  | 0.50  | 0.14  | 0.66  | -0.08 | 0.89  | -0.45 | 0.20  |
| cassava4.1_008254m.g | major CHO metabolism.synthesis.sucrose.SPP                           | highly similar to ( 626) AT2G35840   Symbols:   sucrose-phosphatase 1 (SPP1)                                                                                          | -0.29 | -0.23 | 0.31  | 0.40  | -0.05 | -0.11 | -0.23 | -1.15 | -0.54 | -1.03 |
| cassava4.1_004111m.g | transport.sugars.sucrose                                             | highly similar to ( 620) AT1G22710   Symbols: SUC2, SUT1, ATSUC2   SUC2 (SUCROSE-PROTON SYMPORTER 2)                                                                  | 0.80  | 1.66  | -0.18 | -0.35 | -0.13 | 0.77  | -0.13 | 0.24  | -0.30 | -0.25 |
| cassava4.1_006202m.g | transport.sugars.sucrose                                             | highly similar to ( 628) AT1G09960   Symbols: SUT4, ATSUT4, suc4   SUT4 (SUCROSE TRANSPORTER 4)                                                                       | 0.71  | 0.94  | 0.09  | 0.80  | 0.02  | 0.78  | 0.09  | 0.76  | -0.08 | 0.15  |
| cassava4.1_006880m.g | transport.sugars.sucrose                                             | highly similar to ( 609) AT1G09960   Symbols: SUT4, ATSUT4, suc4   SUT4 (SUCROSE TRANSPORTER 4)                                                                       | -0.69 | -1.23 | -0.32 | -0.29 | 0.12  | 0.41  | 0.33  | 0.59  | 0.30  | 0.16  |
| cassava4.1_007460m.g | transport.sugars.sucrose                                             | highly similar to ( 536) AT1G22710   Symbols: SUC2, SUT1, ATSUC2   SUC2 (SUCROSE-PROTON SYMPORTER 2)                                                                  | 0.55  | 0.93  | -0.18 | 0.46  | -0.18 | 1.64  | 0.29  | 0.83  | -0.63 | 0.71  |
| cassava4.1_021570m.g | transport.sugars                                                     | MSS1; carbohydrate transmembrane transporter/ hexose:hydrogen                                                                                                         | 1.87  | 2.84  | 0.08  | 1.09  | 0.74  | 2.50  | 0.26  | 2.17  | 1.74  | 2.78  |

|                      |                                                                |                                                                                                                                                                                   |       |       |       |       |       |       |       |       |       |       |  |
|----------------------|----------------------------------------------------------------|-----------------------------------------------------------------------------------------------------------------------------------------------------------------------------------|-------|-------|-------|-------|-------|-------|-------|-------|-------|-------|--|
|                      |                                                                | symporter/ high-affinity hydrogen:glucose symporter/<br>sugar:hydrogen symporter                                                                                                  |       |       |       |       |       |       |       |       |       |       |  |
| cassava4.1_002913m.g | major CHO<br>metabolism.degradation.sucrose.invertases.neutral | highly similar to ( 980) AT3G06500   Symbols:  <br>beta-fructofuranosidase, putative / invertase, putative / saccharase,<br>putative / beta-fructosidase, putative                | 0.44  | 0.51  | 1.09  | 1.68  | 0.28  | 1.44  | 0.67  | 0.66  | -0.49 | 0.85  |  |
| cassava4.1_005201m.g | major CHO<br>metabolism.degradation.sucrose.invertases.neutral | nearly identical (1003) AT4G09510   Symbols: CINV2  <br>beta-fructofuranosidase, putative / invertase, putative / saccharase,<br>putative / beta-fructosidase, putative           | 0.69  | 1.01  | 0.89  | 1.23  | -0.02 | 0.94  | -0.10 | 1.05  | 0.47  | 1.82  |  |
| cassava4.1_002971m.g | major CHO<br>metabolism.degradation.sucrose.invertases.neutral | highly similar to ( 961) AT1G56560   Symbols:  <br>beta-fructofuranosidase, putative / invertase, putative / saccharase,<br>putative / beta-fructosidase, putative                | -0.41 | -1.13 | -0.10 | -0.49 | -0.03 | -0.79 | -0.01 | -1.44 | -0.50 | -1.11 |  |
| cassava4.1_003155m.g | major CHO<br>metabolism.degradation.sucrose.invertases.neutral | highly similar to ( 903) AT5G22510   Symbols:  <br>beta-fructofuranosidase, putative / invertase, putative / saccharase,<br>putative / beta-fructosidase, putative                | -0.30 | -0.71 | 0.03  | -0.57 | -0.05 | -0.47 | 0.00  | -1.52 | -0.72 | -1.61 |  |
| cassava4.1_001840m.g | major CHO metabolism.degradation.sucrose.Susy                  | nearly identical (1488) AT4G02280   Symbols: SUS3, ATSUS3  <br>SUS3 (sucrose synthase 3); UDP-glycosyltransferase/ sucrose<br>synthase/ transferase, transferring glycosyl groups | 0.96  | 1.95  | 0.15  | 0.45  | 0.22  | 0.77  | 1.60  | 3.03  | 0.72  | 1.89  |  |
| cassava4.1_001867m.g | major CHO metabolism.degradation.sucrose.Susy                  | nearly identical (1395) AT3G43190   Symbols: SUS4, ATSUS4  <br>SUS4; UDP-glycosyltransferase/ sucrose synthase/ transferase,<br>transferring glycosyl groups                      | -0.81 | -0.67 | -0.86 | -0.50 | -0.37 | -1.88 | -0.67 | -1.44 | -0.81 | -1.00 |  |
| cassava4.1_001871m.g | major CHO metabolism.degradation.sucrose.Susy                  | nearly identical (1416) AT3G43190   Symbols: SUS4, ATSUS4  <br>SUS4; UDP-glycosyltransferase/ sucrose synthase/ transferase,<br>transferring glycosyl groups                      | -0.07 | -0.19 | 0.38  | 0.58  | -0.05 | 0.36  | -1.10 | 0.50  | 0.96  | 1.16  |  |
| cassava4.1_001874m.g | major CHO metabolism.degradation.sucrose.Susy                  | nearly identical (1167) AT1G73370   Symbols: SUS6, ATSUS6  <br>SUS6 (SUCROSE SYNTHASE 6); UDP-glycosyltransferase/<br>sucrose synthase                                            | 2.07  | 3.16  | 0.75  | 0.93  | 0.48  | 1.67  | 1.90  | 2.75  | 0.58  | 2.21  |  |
| cassava4.1_027790m.g | major CHO metabolism.degradation.sucrose.Susy                  | nearly identical (1178) AT1G73370   Symbols: SUS6, ATSUS6  <br>SUS6 (SUCROSE SYNTHASE 6); UDP-glycosyltransferase/                                                                | 0.80  | 2.04  | 0.47  | 1.06  | -0.12 | 0.95  | -0.50 | -0.04 | 0.21  | 1.19  |  |



|                      |                                                        |                                                                                                                                                   |      |      |      |      |      |      |      |      |      |      |  |
|----------------------|--------------------------------------------------------|---------------------------------------------------------------------------------------------------------------------------------------------------|------|------|------|------|------|------|------|------|------|------|--|
|                      |                                                        | sucrose synthase                                                                                                                                  |      |      |      |      |      |      |      |      |      |      |  |
| cassava4.1_005907m.g | major CHO<br>metabolism.degradation.sucrose.hexokinase | highly similar to ( 627) AT1G50460   Symbols: HKL1   HKL1<br>(HEXOKINASE-LIKE 1); ATP binding / fructokinase/ glucokinase/<br>hexokinase          | 2.43 | 1.47 | 1.77 | 2.47 | 0.21 | 2.12 | 1.04 | 4.23 | 1.94 | 4.59 |  |
| cassava4.1_005952m.g | major CHO<br>metabolism.degradation.sucrose.hexokinase | highly similar to ( 627) AT1G50460   Symbols: HKL1   HKL1<br>(HEXOKINASE-LIKE 1); ATP binding / fructokinase/ glucokinase/<br>hexokinase          | 0.58 | 0.15 | 0.39 | 0.36 | 0.08 | 0.94 | 0.19 | 0.06 | 0.18 | 0.86 |  |
| cassava4.1_006138m.g | major CHO<br>metabolism.degradation.sucrose.hexokinase | highly similar to ( 754) AT4G29130   Symbols: ATHXK1, GIN2,<br>HXK1   HXK1 (HEXOKINASE 1); ATP binding / fructokinase/<br>glucokinase/ hexokinase | 0.77 | 1.27 | 0.28 | 0.59 | 0.21 | 0.62 | 0.29 | 1.94 | 0.46 | 1.14 |  |

**Supplemental Table S7. Genes annotated to transcription factor and light signalling. The extent of differential expression is measured in terms of log2 fold change of treatment vs. control.**

| Cluster | Cassava ID           | Mapman Category                                                                                           | Short Description                                                | PG0     | FG0  | PG2   | FG2   | PG4    | FG4   | PG0   | FG0  | PG2   | FG2  |
|---------|----------------------|-----------------------------------------------------------------------------------------------------------|------------------------------------------------------------------|---------|------|-------|-------|--------|-------|-------|------|-------|------|
|         |                      |                                                                                                           |                                                                  | 120 day |      |       |       | 45 day |       |       |      |       |      |
| C1      | cassava4.1_013886m.g | RNA.regulation of transcription.AP2/EREBP,<br>APETALA2/Ethylene-responsive element binding protein family | Integrase-type DNA-binding<br>superfamily protein                | 1.04    | 0.54 | -0.39 | -1.43 | 0.12   | -0.22 | -0.45 | 0.62 | -0.22 | 0.69 |
|         | cassava4.1_013880m.g | RNA.regulation of transcription.AP2/EREBP,<br>APETALA2/Ethylene-responsive element binding protein family | ethylene-responsive element binding<br>protein                   | 1.24    | 0.68 | 0.59  | -0.05 | 0.16   | 0.37  | 0.45  | 1.92 | 0.78  | 2.08 |
|         | cassava4.1_010743m.g | RNA.regulation of transcription.bHLH,Basic Helix-Loop-Helix family                                        | basic helix-loop-helix (bHLH)<br>DNA-binding superfamily protein | 1.33    | 1.46 | 0.21  | 0.20  | 0.16   | 0.15  | 0.78  | 1.45 | 1.01  | 1.80 |
|         | cassava4.1_009529m.g | RNA.regulation of transcription.AP2/EREBP,<br>APETALA2/Ethylene-responsive element binding protein family | related to AP2 12                                                | 0.25    | 0.28 | -0.43 | -0.29 | 0.26   | 0.22  | -0.20 | 1.09 | 0.37  | 1.16 |
|         | cassava4.1_011381m.g | RNA.regulation of transcription.SET-domain transcriptional regulator<br>family                            | SET domain protein 20                                            | -0.03   | 0.07 | -0.55 | 0.38  | 0.12   | -0.01 | -1.28 | 1.00 | 0.43  | 1.69 |

|                      |                                                                                                        |                                                                          |       |       |       |       |       |      |       |      |       |      |
|----------------------|--------------------------------------------------------------------------------------------------------|--------------------------------------------------------------------------|-------|-------|-------|-------|-------|------|-------|------|-------|------|
| cassava4.1_014267m.g | RNA.regulation of transcription.AP2/EREBP, APETALA2/Ethylene-responsive element binding protein family | ethylene-responsive element binding protein                              | 0.25  | 2.40  | -1.99 | -0.64 | 0.53  | 0.80 | 0.97  | 3.06 | 1.66  | 1.79 |
| cassava4.1_013174m.g | RNA.regulation of transcription.HSF,Heat-shock transcription factor family                             | heat shock factor 4                                                      | 1.33  | 2.49  | -0.19 | 0.94  | 0.26  | 2.99 | 2.04  | 3.38 | 1.09  | 3.09 |
| cassava4.1_009652m.g | RNA.regulation of transcription.AP2/EREBP, APETALA2/Ethylene-responsive element binding protein family | related to AP2 12                                                        | 0.26  | 0.47  | 0.06  | 0.20  | 0.20  | 0.79 | 0.08  | 0.62 | -0.28 | 0.39 |
| cassava4.1_034346m.g | RNA.regulation of transcription.GeBP like                                                              | DNA-binding storekeeper protein-related transcriptional regulator        | 0.45  | 0.77  | -0.05 | 0.17  | 0.32  | 0.75 | -0.38 | 1.04 | -0.10 | 0.62 |
| cassava4.1_002532m.g | RNA.regulation of transcription.bHLH,Basic Helix-Loop-Helix family                                     | Serine/threonine-protein kinase WNK (With No Lysine)-related             | 0.98  | 0.92  | 0.45  | 0.57  | 0.07  | 0.80 | 0.50  | 0.97 | 0.26  | 0.84 |
| cassava4.1_006085m.g | RNA.regulation of transcription.C2C2(Zn) CO-like, Constans-like zinc finger family                     | B-box type zinc finger protein with CCT domain                           | 1.23  | 1.05  | 0.60  | 0.67  | -0.06 | 0.88 | 0.15  | 2.05 | -0.18 | 1.07 |
| cassava4.1_011035m.g | RNA.regulation of transcription.Aux/IAA family                                                         | phytochrome-associated protein 1                                         | 1.96  | 2.16  | 0.35  | 0.73  | 0.19  | 1.84 | -0.48 | 4.07 | 0.76  | 2.43 |
| cassava4.1_002962m.g | RNA.regulation of transcription.SET-domain transcriptional regulator family                            | SU(VAR)3-9 homolog 1                                                     | 0.15  | 0.28  | -0.05 | 0.01  | -0.12 | 0.13 | 0.06  | 0.83 | 0.02  | 0.47 |
| cassava4.1_013977m.g | RNA.regulation of transcription.bHLH,Basic Helix-Loop-Helix family                                     | BIG PETAL P                                                              | -0.14 | -0.11 | -0.35 | -0.13 | 0.09  | 1.43 | -0.18 | 0.71 | 0.70  | 1.16 |
| cassava4.1_025964m.g | RNA.regulation of transcription.bHLH,Basic Helix-Loop-Helix family                                     | basic helix-loop-helix (bHLH) DNA-binding superfamily protein            | 0.96  | -0.36 | -0.08 | 0.68  | 0.29  | 3.39 | -0.54 | 1.55 | 0.80  | 3.09 |
| cassava4.1_012328m.g | RNA.regulation of transcription.G2-like transcription factor family, GARP                              | Homeodomain-like superfamily protein                                     | -0.21 | -0.09 | 0.02  | 0.47  | -0.08 | 1.18 | -0.07 | 0.52 | -0.18 | 0.62 |
| cassava4.1_006932m.g | RNA.regulation of transcription.bHLH,Basic Helix-Loop-Helix family                                     | NACL-inducible gene 1                                                    | 0.63  | -1.07 | 0.03  | 0.64  | 0.35  | 1.54 | -1.76 | 0.69 | -0.25 | 0.46 |
| cassava4.1_012221m.g | RNA.regulation of transcription.C2C2(Zn) DOF zinc finger family                                        | Dof-type zinc finger DNA-binding family protein                          | 0.97  | 0.51  | 1.56  | 1.20  | 0.36  | 1.48 | -0.13 | 1.34 | 0.73  | 1.04 |
| cassava4.1_010727m.g | RNA.regulation of transcription.C2C2(Zn) GATA transcription factor family                              | Plant-specific GATA-type zinc finger transcription factor family protein | 1.14  | 0.46  | 0.69  | 1.23  | 0.14  | 1.04 | -0.53 | 0.96 | 0.10  | 1.04 |
| cassava4.1_018669m.g | RNA.regulation of transcription.C2C2(Zn) GATA transcription factor family                              | GATA transcription factor 15                                             | 0.61  | 0.57  | 0.56  | 0.80  | 0.32  | 0.97 | -0.39 | 0.96 | -0.25 | 0.96 |
| cassava4.1_027980m.g | RNA.regulation of transcription.C2C2(Zn) CO-like, Constans-like zinc finger family                     | CONSTANS-like 9                                                          | 0.34  | 0.55  | 0.83  | 1.42  | 0.16  | 1.18 | 0.36  | 1.57 | 0.12  | 0.94 |

|                      |                                                                                                           |                                                                  |       |       |      |      |       |      |       |      |       |      |
|----------------------|-----------------------------------------------------------------------------------------------------------|------------------------------------------------------------------|-------|-------|------|------|-------|------|-------|------|-------|------|
| cassava4.1_005340m.g | RNA.regulation of transcription.bHLH,Basic Helix-Loop-Helix family                                        | basic helix-loop-helix (bHLH)<br>DNA-binding superfamily protein | 0.65  | -0.19 | 1.38 | 1.40 | -0.05 | 1.44 | 0.27  | 2.74 | -0.19 | 0.97 |
| cassava4.1_016130m.g | RNA.regulation of transcription.MADS box transcription factor family                                      | AGAMOUS-like 20                                                  | -0.19 | -0.61 | 0.40 | 0.58 | -0.06 | 0.62 | -0.33 | 1.31 | -0.19 | 0.78 |
| cassava4.1_008985m.g | RNA.regulation of transcription.MYB domain transcription factor family                                    | myb domain protein 111                                           | 0.98  | 0.80  | 1.32 | 0.68 | -0.78 | 1.73 | 0.32  | 2.04 | 1.28  | 2.27 |
| cassava4.1_008697m.g | RNA.regulation of transcription.ABI3/VP1-related B3-domain-containing transcription factor family         | AP2/B3-like transcriptional factor<br>family protein             | 0.78  | 0.82  | 0.65 | 1.07 | 0.09  | 1.51 | 0.73  | 2.37 | 0.72  | 2.13 |
| cassava4.1_013572m.g | RNA.regulation of transcription.Bromodomain proteins                                                      | DNA-binding<br>bromodomain-containing protein                    | 0.03  | 0.21  | 0.10 | 0.81 | -0.26 | 0.63 | 0.03  | 1.23 | 0.05  | 1.05 |
| cassava4.1_022303m.g | RNA.regulation of transcription.bHLH,Basic Helix-Loop-Helix family                                        | basic helix-loop-helix (bHLH)<br>DNA-binding superfamily protein | 1.45  | 1.47  | 1.87 | 2.15 | 0.36  | 2.42 | 0.80  | 3.42 | 1.96  | 3.91 |
| cassava4.1_002844m.g | RNA.regulation of transcription.bHLH,Basic Helix-Loop-Helix family                                        | basic helix-loop-helix (bHLH)<br>DNA-binding superfamily protein | 0.65  | 1.68  | 1.38 | 3.24 | 0.39  | 3.03 | 0.13  | 3.37 | 0.96  | 5.32 |
| cassava4.1_019365m.g | RNA.regulation of transcription.Chromatin Remodeling Factors                                              | unknow                                                           | 0.71  | 1.08  | 0.52 | 1.33 | 0.20  | 1.64 | 0.05  | 2.30 | 0.70  | 2.59 |
| cassava4.1_028721m.g | RNA.regulation of transcription.MYB domain transcription factor family                                    | myb domain protein 5                                             | -0.24 | -1.02 | 1.66 | 1.82 | 0.13  | 1.86 | -1.03 | 4.27 | 1.09  | 5.32 |
| cassava4.1_010068m.g | RNA.regulation of transcription.AP2/EREBP,<br>APETALA2/Ethylene-responsive element binding protein family | AP2/B3 transcription factor family<br>protein                    | 1.09  | 0.17  | 1.83 | 2.19 | -0.07 | 1.74 | -0.11 | 2.00 | 1.96  | 2.30 |
| cassava4.1_010829m.g | RNA.regulation of transcription.bHLH,Basic Helix-Loop-Helix family                                        | basic helix-loop-helix (bHLH)<br>DNA-binding superfamily protein | 0.56  | 0.29  | 1.19 | 1.69 | 0.39  | 1.91 | -0.56 | 1.27 | 0.81  | 2.96 |
| cassava4.1_016663m.g | RNA.regulation of transcription.bHLH,Basic Helix-Loop-Helix family                                        | basic helix-loop-helix (bHLH)<br>DNA-binding superfamily protein | 0.13  | -0.36 | 0.54 | 0.86 | 0.04  | 1.27 | -0.21 | 0.68 | 0.42  | 1.40 |
| cassava4.1_034118m.g | RNA.regulation of transcription.C2C2(Zn) DOF zinc finger family                                           | Dof-type zinc finger DNA-binding<br>family protein               | 0.53  | 0.70  | 1.15 | 1.98 | -0.09 | 1.79 | -0.20 | 1.61 | 0.82  | 2.16 |
| cassava4.1_010892m.g | RNA.regulation of transcription.Aux/IAA family                                                            | phytochrome-associated protein 1                                 | 1.65  | 2.05  | 1.57 | 3.34 | 0.49  | 3.80 | -0.35 | 3.15 | 1.06  | 3.80 |
| cassava4.1_012643m.g | RNA.regulation of transcription.MYB domain transcription factor family                                    | myb domain protein 5                                             | 3.75  | 5.04  | 4.53 | 6.13 | 0.24  | 6.73 | -1.99 | 6.15 | 2.00  | 7.93 |
| cassava4.1_004650m.g | RNA.regulation of transcription.GRAS transcription factor family                                          | GRAS family transcription factor                                 | 1.88  | 1.13  | 2.42 | 3.08 | 0.75  | 1.79 | -0.05 | 5.28 | 1.56  | 3.65 |
| cassava4.1_000786m.g | RNA.regulation of transcription.CCAAT box binding factor family, DR1                                      | CCAAT-binding factor                                             | 0.19  | 0.68  | 0.26 | 0.61 | -0.11 | 0.59 | -0.86 | 1.75 | 0.23  | 1.28 |
| cassava4.1_014347m.g | RNA.regulation of transcription.HB,Homeobox transcription factor family                                   | WUSCHEL related homeobox 13                                      | 0.29  | 0.60  | 0.19 | 0.35 | -0.10 | 0.18 | -0.36 | 1.30 | 0.54  | 1.01 |
| cassava4.1_012390m.g | RNA.regulation of transcription.AP2/EREBP,                                                                | ethylene-responsive element binding                              | 1.26  | 1.35  | 0.87 | 1.50 | 0.17  | 0.20 | 0.02  | 1.80 | 0.82  | 1.56 |

|                      |                                                                                                        |                                                               |       |      |       |      |       |      |       |      |       |      |  |
|----------------------|--------------------------------------------------------------------------------------------------------|---------------------------------------------------------------|-------|------|-------|------|-------|------|-------|------|-------|------|--|
|                      | APETALA2/Ethylene-responsive element binding protein family                                            | protein                                                       |       |      |       |      |       |      |       |      |       |      |  |
| cassava4.1_015101m.g | RNA.regulation of transcription.MYB domain transcription factor family                                 | myb domain protein 5                                          | 5.68  | 4.89 | 2.96  | 4.06 | 0.50  | 3.91 | -0.60 | 6.02 | 3.05  | 8.07 |  |
| cassava4.1_014074m.g | RNA.regulation of transcription.MYB domain transcription factor family                                 | myb domain protein 4                                          | 4.71  | 5.65 | 4.06  | 6.04 | 0.52  | 5.36 | 0.22  | 8.73 | 4.14  | 8.64 |  |
| cassava4.1_016153m.g | RNA.regulation of transcription.MYB-related transcription factor family                                | Duplicated homeodomain-like superfamily protein               | 2.27  | 2.00 | 2.34  | 3.50 | 0.34  | 2.12 | 0.19  | 3.68 | 2.22  | 4.19 |  |
| cassava4.1_029459m.g | RNA.regulation of transcription.MYB domain transcription factor family                                 | myb domain protein 3                                          | -0.27 | 1.19 | -0.13 | 1.21 | -0.03 | 0.88 | 0.01  | 0.95 | 0.38  | 1.47 |  |
| cassava4.1_014632m.g | RNA.regulation of transcription.AP2/EREBP, APETALA2/Ethylene-responsive element binding protein family | related to AP2 6l                                             | 2.16  | 3.57 | 1.15  | 2.83 | 0.03  | 3.83 | 1.75  | 4.17 | 2.02  | 4.79 |  |
| cassava4.1_024069m.g | RNA.regulation of transcription.Chromatin Remodeling Factors                                           | chromatin remodeling 31                                       | 1.61  | 1.88 | 0.53  | 1.95 | -0.48 | 1.13 | 0.72  | 2.51 | 0.87  | 2.83 |  |
| cassava4.1_020908m.g | RNA.regulation of transcription.MYB domain transcription factor family                                 | myb domain protein 5                                          | 0.63  | 2.04 | 0.83  | 2.64 | 0.12  | 1.39 | 0.34  | 3.58 | 0.87  | 6.10 |  |
| cassava4.1_011594m.g | RNA.regulation of transcription.MYB domain transcription factor family                                 | myb domain protein 5                                          | 0.41  | 1.12 | 0.02  | 1.65 | 0.25  | 0.82 | -0.02 | 1.62 | -0.38 | 3.26 |  |
| cassava4.1_015395m.g | RNA.regulation of transcription.MYB domain transcription factor family                                 | myb domain protein 4                                          | 1.44  | 2.43 | 1.28  | 3.10 | -0.43 | 2.32 | -0.73 | 2.46 | 2.08  | 6.80 |  |
| cassava4.1_016832m.g | RNA.regulation of transcription.AS2,Lateral Organ Boundaries Gene Family                               | LOB domain-containing protein 1                               | 0.52  | 2.53 | 0.60  | 2.78 | -0.02 | 2.25 | -1.22 | 1.55 | 1.35  | 2.41 |  |
| cassava4.1_012667m.g | RNA.regulation of transcription.AS2,Lateral Organ Boundaries Gene Family                               | LOB domain-containing protein 41                              | 1.05  | 3.60 | 3.24  | 5.84 | 0.72  | 5.36 | -0.99 | 3.75 | 2.25  | 3.02 |  |
| cassava4.1_010104m.g | RNA.regulation of transcription.bHLH,Basic Helix-Loop-Helix family                                     | basic helix-loop-helix (bHLH) DNA-binding superfamily protein | 0.82  | 2.09 | 0.41  | 1.18 | -0.36 | 1.59 | 0.30  | 1.19 | 0.27  | 1.62 |  |
| cassava4.1_000036m.g | RNA.regulation of transcription.Chromatin Remodeling Factors                                           | transcription regulatory protein SNF2, putative               | 1.91  | 3.64 | 1.21  | 2.82 | 0.37  | 4.18 | 0.66  | 2.52 | 1.17  | 3.10 |  |
| cassava4.1_014014m.g | RNA.regulation of transcription.HB,Homeobox transcription factor family                                | homeobox protein 16                                           | 0.90  | 1.36 | -0.04 | 1.24 | -0.14 | 2.49 | -0.40 | 1.50 | 0.33  | 1.69 |  |
| cassava4.1_005519m.g | RNA.regulation of transcription.C2H2 zinc finger family                                                | C2H2-like zinc finger protein                                 | 0.45  | 1.33 | 0.13  | 0.94 | 0.12  | 1.37 | -0.12 | 0.79 | 0.22  | 0.54 |  |
| cassava4.1_028193m.g | RNA.regulation of transcription.MYB domain transcription factor family                                 | MYB-like 102                                                  | 0.47  | 1.21 | 0.04  | 0.90 | 0.20  | 1.97 | -0.01 | 1.24 | 0.02  | 0.31 |  |
| cassava4.1_012780m.g | RNA.regulation of transcription.bZIP transcription factor family                                       | basic leucine zipper 9                                        | 1.16  | 1.75 | 0.59  | 1.18 | -0.17 | 1.38 | 0.55  | 0.90 | 0.13  | 0.71 |  |
| cassava4.1_028489m.g | RNA.regulation of transcription.G2-like transcription factor family, GARP                              | Homeodomain-like superfamily protein                          | 1.12  | 2.02 | 0.85  | 1.76 | -0.08 | 2.05 | 0.09  | 1.07 | -0.28 | 0.68 |  |
| cassava4.1_008256m.g | RNA.regulation of transcription.TCP transcription factor family                                        | TCP family transcription factor                               | 0.46  | 0.90 | 0.21  | 0.58 | -0.05 | 0.72 | -0.43 | 0.35 | -0.04 | 0.14 |  |
| cassava4.1_012542m.g | RNA.regulation of transcription.MYB-related transcription factor family                                | Duplicated homeodomain-like                                   | 2.02  | 1.44 | 1.13  | 1.30 | 0.21  | 0.76 | -0.48 | 0.95 | 0.66  | 1.86 |  |

|                      |                                                                                  |                                                                  |                     |       |       |       |       |       |       |       |       |       |  |
|----------------------|----------------------------------------------------------------------------------|------------------------------------------------------------------|---------------------|-------|-------|-------|-------|-------|-------|-------|-------|-------|--|
|                      |                                                                                  |                                                                  | superfamily protein |       |       |       |       |       |       |       |       |       |  |
| cassava4.1_011111m.g | RNA.regulation of transcription.MYB domain transcription factor family           | myb domain protein 73                                            | 1.99                | 1.73  | 1.91  | 2.88  | 0.12  | 0.83  | -0.61 | 1.94  | 0.74  | 1.93  |  |
| cassava4.1_008733m.g | RNA.regulation of transcription.PHOR1                                            | plant U-box 29                                                   | 2.05                | 1.96  | 3.42  | 4.42  | 0.48  | 1.49  | -0.54 | 3.22  | 2.59  | 3.29  |  |
| cassava4.1_014105m.g | RNA.regulation of transcription.C2C2(Zn) GATA transcription factor family        | GATA transcription factor 1                                      | -0.03               | 0.10  | 0.13  | 0.19  | -0.03 | 0.01  | -1.36 | -0.28 | -0.08 | -0.09 |  |
| cassava4.1_033577m.g | RNA.regulation of transcription.C2H2 zinc finger family                          | zinc finger (C2H2 type) family protein                           | 0.02                | 0.27  | 0.26  | 0.29  | -0.12 | -0.04 | -1.20 | 0.09  | -0.28 | 0.24  |  |
| cassava4.1_034350m.g | RNA.regulation of transcription.MYB domain transcription factor family           | myb domain protein r1                                            | 1.39                | 1.46  | 1.73  | 1.87  | 0.37  | 0.13  | -1.02 | 0.77  | 1.51  | 0.95  |  |
| cassava4.1_011082m.g | RNA.regulation of transcription.TCP transcription factor family                  | TCP family transcription factor 4                                | 0.93                | 0.42  | 0.77  | 1.11  | 0.23  | 0.38  | -1.04 | -0.43 | 0.41  | 0.70  |  |
| cassava4.1_014713m.g | RNA.regulation of transcription.C2H2 zinc finger family                          | C2H2 and C2HC zinc fingers superfamily protein                   | 1.15                | 1.82  | 2.69  | 3.45  | 0.38  | 1.40  | 1.99  | 3.23  | 1.28  | 0.89  |  |
| cassava4.1_003495m.g | RNA.regulation of transcription.GRAS transcription factor family                 | SCARECROW-like 8                                                 | 0.65                | 0.01  | 0.43  | 0.12  | 0.03  | 0.57  | 0.60  | 1.44  | -0.24 | -0.18 |  |
| cassava4.1_019535m.g | RNA.regulation of transcription.General Transcription, TBP-binding protein       | YEATS family protein                                             | 0.00                | 0.79  | 0.32  | 0.50  | 0.18  | 0.97  | 0.60  | 1.73  | 0.06  | 0.60  |  |
| cassava4.1_008339m.g | RNA.regulation of transcription.bZIP transcription factor family                 | G-box binding factor 3                                           | 0.99                | 0.99  | 0.17  | 0.27  | 0.05  | 1.45  | 1.71  | 3.83  | 0.30  | 1.14  |  |
| cassava4.1_014981m.g | RNA.regulation of transcription.HB,Homeobox transcription factor family          | homeobox 7                                                       | 1.32                | 1.89  | 0.61  | 1.78  | 0.38  | 3.33  | 2.84  | 5.06  | 0.73  | 2.33  |  |
| cassava4.1_007413m.g | RNA.regulation of transcription.C2H2 zinc finger family                          | C2H2 and C2HC zinc fingers superfamily protein                   | 0.35                | 0.63  | -0.03 | -0.11 | 0.04  | -0.03 | 0.85  | 1.57  | 0.31  | 0.71  |  |
| cassava4.1_009488m.g | RNA.regulation of transcription.C3H zinc finger family                           | CCCH-type zinc finger family protein                             | 0.81                | 0.51  | -0.39 | -1.01 | -0.05 | 0.10  | 1.34  | 2.25  | -0.47 | -0.25 |  |
| cassava4.1_009450m.g | RNA.regulation of transcription.C3H zinc finger family                           | CCCH-type zinc finger family protein                             | 0.15                | -0.84 | -1.01 | -2.10 | -0.11 | -0.04 | 1.06  | 1.40  | -0.03 | -0.51 |  |
| cassava4.1_012382m.g | RNA.regulation of transcription.CCAAT box binding factor family, HAP2            | nuclear factor Y, subunit A9                                     | -0.01               | -0.68 | -0.16 | -0.96 | 0.05  | 0.84  | 2.53  | 3.26  | -0.27 | 0.14  |  |
| cassava4.1_004896m.g | RNA.regulation of transcription.CPP(Zn),CPP1-related transcription factor family | TESMIN/TSO1-like CXC 2                                           | 0.38                | -0.01 | 0.30  | -0.25 | -0.44 | -0.19 | 1.69  | 1.24  | 0.43  | 0.31  |  |
| cassava4.1_009750m.g | RNA.regulation of transcription.HSF,Heat-shock transcription factor family       | heat shock transcription factor A2                               | 1.73                | 1.70  | 1.42  | 1.23  | -0.11 | -1.22 | 3.62  | 3.26  | 1.25  | 1.21  |  |
| cassava4.1_004528m.g | RNA.regulation of transcription.bHLH,Basic Helix-Loop-Helix family               | basic helix-loop-helix (bHLH)<br>DNA-binding superfamily protein | -0.31               | -0.69 | 0.13  | 0.30  | -0.05 | 0.21  | 0.44  | 1.01  | 0.17  | 0.27  |  |
| cassava4.1_014707m.g | RNA.regulation of transcription.C2H2 zinc finger family                          | zinc-finger protein 2                                            | 0.42                | -0.04 | 1.20  | 0.28  | 0.48  | 0.19  | 0.80  | 2.20  | 1.10  | 1.15  |  |
| cassava4.1_014662m.g | RNA.regulation of transcription.C2H2 zinc finger family                          | salt tolerance zinc finger                                       | 0.67                | -0.31 | 1.47  | 0.33  | 0.21  | -0.08 | 0.25  | 2.08  | 0.82  | 0.84  |  |
| cassava4.1_017982m.g | RNA.regulation of transcription.C2H2 zinc finger family                          | C2H2-type zinc finger family protein                             | 0.22                | -1.16 | 1.78  | 1.60  | 0.30  | 0.56  | 0.65  | 2.86  | 1.10  | 0.24  |  |
| cassava4.1_014607m.g | RNA.regulation of transcription.C2H2 zinc finger family                          | salt tolerance zinc finger                                       | 0.68                | -0.11 | 1.73  | 0.92  | 0.30  | -0.06 | 0.21  | 2.00  | 1.19  | -0.07 |  |

|    |                      |                                                                                                        |                                                                                                   |       |       |       |       |       |       |       |       |       |       |
|----|----------------------|--------------------------------------------------------------------------------------------------------|---------------------------------------------------------------------------------------------------|-------|-------|-------|-------|-------|-------|-------|-------|-------|-------|
|    | cassava4.1_002960m.g | RNA.regulation of transcription.ARF, Auxin Response Factor family                                      | auxin response factor 16                                                                          | 0.76  | -0.59 | 0.20  | -0.55 | -0.11 | -0.01 | 0.37  | 0.91  | 0.34  | 0.44  |
|    | cassava4.1_006005m.g | RNA.regulation of transcription.AP2/EREBP, APETALA2/Ethylene-responsive element binding protein family | related to AP2.7                                                                                  | 0.90  | -0.53 | 0.23  | 0.01  | -0.11 | 0.09  | 0.66  | 1.52  | 0.15  | 1.18  |
|    | cassava4.1_007184m.g | RNA.regulation of transcription.bZIP transcription factor family                                       | Basic-leucine zipper (bZIP) transcription factor family protein                                   | 0.24  | -0.54 | -0.11 | -0.14 | -0.22 | -0.16 | 0.39  | 1.38  | 0.56  | 0.73  |
|    | cassava4.1_023048m.g | RNA.regulation of transcription.bHLH,Basic Helix-Loop-Helix family                                     | basic helix-loop-helix (bHLH) DNA-binding superfamily protein                                     | -0.01 | -0.70 | -0.09 | -0.84 | 0.02  | -0.19 | 0.14  | 1.31  | 0.00  | -0.03 |
|    | cassava4.1_004069m.g | RNA.regulation of transcription.Trihelix, Triple-Helix transcription factor family                     | Duplicated homeodomain-like superfamily protein                                                   | -0.55 | -2.66 | -0.43 | -2.80 | -0.24 | -0.77 | 0.46  | 1.65  | 0.22  | 0.01  |
| C2 | cassava4.1_015506m.g | RNA.regulation of transcription.bHLH,Basic Helix-Loop-Helix family                                     | basic helix-loop-helix (bHLH) DNA-binding superfamily protein                                     | -0.18 | -0.21 | -0.11 | 0.14  | -0.31 | -1.68 | -0.42 | -0.11 | 0.58  | 0.29  |
|    | cassava4.1_004906m.g | RNA.regulation of transcription.G2-like transcription factor family, GARP                              | RNA-binding (RRM/RBD/RNP motifs) family protein                                                   | 0.50  | 0.81  | 0.38  | 0.43  | -0.09 | -0.75 | 0.69  | 0.36  | 0.88  | 1.39  |
|    | cassava4.1_033275m.g | RNA.regulation of transcription.LUG                                                                    | LEUNIG_homolog                                                                                    | 1.03  | 0.50  | 0.88  | 1.08  | -0.49 | -0.51 | 0.38  | 0.77  | 0.89  | 1.83  |
|    | cassava4.1_023141m.g | RNA.regulation of transcription.MYB domain transcription factor family                                 | myb domain protein 73                                                                             | 1.55  | 1.27  | 1.62  | 2.34  | 0.39  | 1.15  | 0.92  | 1.34  | 1.96  | 2.53  |
|    | cassava4.1_000393m.g | RNA.regulation of transcription.Chromatin Remodeling Factors                                           | SNF2 domain-containing protein / helicase domain-containing protein / zinc finger protein-related | 0.21  | 0.50  | 0.32  | 0.87  | -0.04 | 0.12  | 0.40  | 0.10  | 0.96  | 0.44  |
|    | cassava4.1_004902m.g | RNA.regulation of transcription.C2H2 zinc finger family                                                | C2H2-like zinc finger protein                                                                     | -0.03 | 0.52  | 0.15  | 0.77  | -0.24 | -0.42 | -0.43 | -1.48 | 0.47  | 0.41  |
|    | cassava4.1_006556m.g | RNA.regulation of transcription.G2-like transcription factor family, GARP                              | myb-like HTH transcriptional regulator family protein                                             | 0.44  | 0.76  | 0.87  | 1.24  | 0.08  | -0.14 | 0.58  | -0.50 | 0.56  | 0.62  |
|    | cassava4.1_000117m.g | RNA.regulation of transcription.Chromatin Remodeling Factors                                           | chromatin remodeling 5                                                                            | -0.01 | 0.52  | 0.22  | 0.39  | -0.50 | -0.77 | 0.79  | -0.70 | 0.29  | -0.04 |
|    | cassava4.1_000114m.g | RNA.regulation of transcription.Chromatin Remodeling Factors                                           | chromatin remodeling 5                                                                            | 0.05  | 0.53  | 0.25  | 0.42  | -0.26 | -0.47 | 0.77  | -0.91 | 0.20  | 0.08  |
|    | cassava4.1_000396m.g | RNA.regulation of transcription.C2H2 zinc finger family                                                | zinc finger protein-related                                                                       | -0.35 | -0.37 | 0.06  | 0.08  | -0.33 | -0.89 | 0.24  | -0.82 | 0.08  | -0.37 |
|    | cassava4.1_000779m.g | RNA.regulation of transcription.Chromatin Remodeling Factors                                           | DNA/RNA helicase protein                                                                          | -0.55 | -0.36 | 0.04  | -0.47 | -0.42 | -1.49 | 0.43  | -1.52 | -0.01 | -0.79 |
|    | cassava4.1_001653m.g | RNA.regulation of transcription.HB,Homeobox transcription factor family                                | Homeobox-leucine zipper family protein / lipid-binding START domain-containing protein            | 0.38  | 0.27  | 0.36  | 0.25  | 0.00  | -0.17 | 0.86  | -0.41 | 0.46  | 0.04  |

|                      |                                                                                                        |                                                                     |       |      |       |       |       |       |       |       |       |       |
|----------------------|--------------------------------------------------------------------------------------------------------|---------------------------------------------------------------------|-------|------|-------|-------|-------|-------|-------|-------|-------|-------|
| cassava4.1_006759m.g | RNA.regulation of transcription.HB,Homeobox transcription factor family                                | BEL1-like homeodomain 6                                             | 0.14  | 0.68 | 0.07  | 0.64  | -0.36 | -0.73 | 0.46  | -1.53 | -0.11 | -0.82 |
| cassava4.1_002618m.g | RNA.regulation of transcription.Nucleosome/chromatin assembly factor group                             | DDT domain-containing protein                                       | -0.13 | 0.43 | 0.35  | 0.57  | -0.21 | -0.32 | 0.39  | -1.09 | 0.23  | -0.55 |
| cassava4.1_012115m.g | RNA.regulation of transcription.HSF,Heat-shock transcription factor family                             | heat shock transcription factor A6B                                 | 2.65  | 2.78 | 1.87  | 1.31  | -1.25 | 0.57  | 2.54  | 0.90  | 0.83  | 1.02  |
| cassava4.1_002701m.g | RNA.regulation of transcription.Chromatin Remodeling Factors                                           | SNF2 domain-containing protein / helicase domain-containing protein | 0.55  | 1.18 | -0.05 | -0.11 | -0.01 | 0.41  | 0.32  | 0.35  | 0.07  | 0.22  |
| cassava4.1_026051m.g | RNA.regulation of transcription.MADS box transcription factor family                                   | AGAMOUS-like 19                                                     | 0.39  | 0.89 | -0.58 | -0.62 | -0.01 | -0.06 | 0.30  | 0.08  | 0.03  | -0.06 |
| cassava4.1_011766m.g | RNA.regulation of transcription.MYB domain transcription factor family                                 | myb domain protein 31                                               | 0.93  | 1.77 | -0.26 | 0.42  | 0.33  | 1.14  | 0.60  | 1.17  | 0.16  | 0.59  |
| cassava4.1_015207m.g | RNA.regulation of transcription.AP2/EREBP, APETALA2/Ethylene-responsive element binding protein family | Integrase-type DNA-binding superfamily protein                      | 0.16  | 1.50 | 0.07  | 0.53  | 0.01  | 0.74  | 0.34  | 0.37  | -0.14 | 0.04  |
| cassava4.1_005556m.g | RNA.regulation of transcription.C2H2 zinc finger family                                                | C2H2-like zinc finger protein                                       | 0.73  | 0.94 | 0.52  | 0.65  | 0.23  | 0.60  | 0.55  | 0.38  | 0.18  | 0.54  |
| cassava4.1_011212m.g | RNA.regulation of transcription.HB,Homeobox transcription factor family                                | KNOTTED1-like homeobox gene 3                                       | 0.56  | 1.11 | 0.10  | 0.34  | -0.09 | 0.20  | 0.28  | 0.14  | 0.03  | 0.20  |
| cassava4.1_008671m.g | RNA.regulation of transcription.bZIP transcription factor family                                       | Basic-leucine zipper (bZIP) transcription factor family protein     | 0.36  | 1.00 | 0.02  | 0.10  | -0.02 | 0.28  | 0.61  | 0.45  | -0.06 | -0.07 |
| cassava4.1_000870m.g | RNA.regulation of transcription.SET-domain transcriptional regulator family                            | SET domain protein 16                                               | 0.45  | 0.93 | 0.05  | 0.44  | 0.11  | -0.09 | 0.50  | 0.42  | 0.06  | -0.18 |
| cassava4.1_015051m.g | RNA.regulation of transcription.HB,Homeobox transcription factor family                                | homeobox 12                                                         | 1.88  | 3.54 | 1.26  | 1.85  | 0.39  | 1.13  | 1.48  | 3.25  | 0.41  | 0.80  |
| cassava4.1_009563m.g | RNA.regulation of transcription.HB,Homeobox transcription factor family                                | homeobox from Arabidopsis thaliana                                  | 1.20  | 2.07 | 0.70  | 1.42  | 0.09  | 1.49  | 0.28  | 3.14  | 0.68  | 1.19  |
| cassava4.1_010339m.g | RNA.regulation of transcription.MYB domain transcription factor family                                 | MYB-like 102                                                        | 1.89  | 3.41 | 1.09  | 2.51  | 0.28  | 2.22  | 0.52  | 3.88  | -0.22 | 0.54  |
| cassava4.1_005470m.g | RNA.regulation of transcription.C2H2 zinc finger family                                                | C2H2 and C2HC zinc fingers superfamily protein                      | 1.00  | 1.61 | 0.91  | 1.28  | 0.18  | 1.65  | 0.65  | 2.01  | 0.33  | 0.93  |
| cassava4.1_012335m.g | RNA.regulation of transcription.MYB domain transcription factor family                                 | myb domain protein 62                                               | 2.38  | 4.45 | 1.50  | 3.31  | -0.18 | 3.75  | 1.91  | 5.55  | -0.27 | 2.18  |
| cassava4.1_010945m.g | RNA.regulation of transcription.MYB domain transcription factor family                                 | myb domain protein 73                                               | 2.06  | 1.80 | 1.31  | 1.60  | 0.23  | 0.49  | -0.14 | 1.97  | 0.36  | 0.41  |
| cassava4.1_014990m.g | RNA.regulation of transcription.C2C2(Zn) DOF zinc finger family                                        | DOF zinc finger protein 1                                           | 1.45  | 2.99 | 0.63  | 1.59  | -0.16 | 1.25  | 0.33  | 1.88  | 1.12  | 1.41  |
| cassava4.1_032831m.g | RNA.regulation of transcription.MYB domain transcription factor family                                 | myb domain protein 6                                                | 0.51  | 2.05 | 0.35  | 1.22  | -0.77 | 0.64  | -0.48 | 1.27  | -0.02 | 0.95  |
| cassava4.1_034188m.g | RNA.regulation of transcription.TCP transcription factor family                                        | TCP family transcription factor                                     | 0.96  | 1.55 | 0.30  | 1.22  | 0.13  | 0.59  | -0.22 | 1.49  | 0.42  | 1.17  |
| cassava4.1_019256m.g | RNA.regulation of transcription.bZIP transcription factor family                                       | TGACG motif-binding factor 4                                        | 0.94  | 1.82 | 0.63  | 0.77  | 0.00  | 0.56  | -0.39 | 0.23  | 0.42  | 0.46  |
| cassava4.1_004334m.g | RNA.regulation of transcription.Trihelix, Triple-Helix transcription factor                            | Protein of unknown function                                         | 0.62  | 1.42 | 0.07  | 0.54  | -0.10 | 0.57  | -0.18 | 0.36  | 0.22  | 0.38  |

|    |                      |                                                                                    |                                                                  |       |       |       |       |       |       |       |       |       |       |
|----|----------------------|------------------------------------------------------------------------------------|------------------------------------------------------------------|-------|-------|-------|-------|-------|-------|-------|-------|-------|-------|
|    |                      | family                                                                             | (DUF1421)                                                        |       |       |       |       |       |       |       |       |       |       |
|    | cassava4.1_000610m.g | RNA.regulation of transcription.ARF, Auxin Response Factor family                  | auxin response factor 19                                         | 0.36  | 1.03  | 0.10  | 0.19  | -0.03 | 0.01  | 0.24  | 0.17  | 0.37  | 0.34  |
|    | cassava4.1_000578m.g | RNA.regulation of transcription.MYB domain transcription factor family             | DIRP ;Myb-like DNA-binding domain                                | 0.43  | 1.70  | 0.36  | 0.85  | -0.43 | -0.05 | 0.68  | 0.53  | 0.40  | 0.66  |
|    | cassava4.1_004089m.g | RNA.regulation of transcription.Trihelix, Triple-Helix transcription factor family | Duplicated homeodomain-like superfamily protein                  | 1.07  | 2.83  | -0.60 | 0.73  | 0.12  | -0.79 | -0.37 | 0.06  | -0.29 | 0.41  |
|    | cassava4.1_004015m.g | RNA.regulation of transcription.bHLH,Basic Helix-Loop-Helix family                 | basic helix-loop-helix (bHLH)<br>DNA-binding superfamily protein | 2.66  | 3.26  | 0.61  | 1.06  | 0.14  | 1.05  | 0.37  | 1.60  | 1.03  | 2.29  |
|    | cassava4.1_006968m.g | RNA.regulation of transcription.GRAS transcription factor family                   | scarecrow-like 3                                                 | 2.37  | 2.84  | 0.43  | 0.34  | 0.32  | 0.88  | 0.72  | 2.84  | 0.91  | 2.15  |
|    | cassava4.1_014027m.g | RNA.regulation of transcription.MYB-related transcription factor family            | myb-like transcription factor family protein                     | 1.23  | 1.69  | 0.12  | 0.35  | 0.38  | 0.74  | -0.09 | 1.43  | 0.40  | 1.28  |
|    | cassava4.1_032811m.g | RNA.regulation of transcription.GRAS transcription factor family                   | GRAS family transcription factor                                 | 1.13  | 1.49  | 0.07  | 0.04  | 0.07  | -0.36 | 0.42  | 0.79  | 0.21  | 0.93  |
|    | cassava4.1_006275m.g | RNA.regulation of transcription.Trihelix, Triple-Helix transcription factor family | Duplicated homeodomain-like superfamily protein                  | 0.95  | 1.69  | 0.57  | 0.80  | 0.10  | 0.22  | 0.52  | 1.05  | 0.47  | 1.15  |
| C3 | cassava4.1_008554m.g | RNA.regulation of transcription.C2C2(Zn) CO-like, Constans-like zinc finger family | CONSTANS-like 9                                                  | -0.53 | -0.50 | -0.21 | -0.14 | -0.33 | -0.28 | 0.91  | 0.11  | 0.52  | 0.40  |
|    | cassava4.1_000223m.g | RNA.regulation of transcription.Chromatin Remodeling Factors                       | chromatin remodeling factor CHD3 (PICKLE)                        | -0.12 | 0.19  | 0.17  | 0.19  | -0.12 | -0.23 | 0.93  | -0.04 | 0.25  | 0.32  |
|    | cassava4.1_011448m.g | RNA.regulation of transcription.C2H2 zinc finger family                            | C2H2-type zinc finger family protein                             | -2.19 | -1.42 | -0.78 | -2.07 | -0.03 | -2.63 | 0.02  | -0.31 | -0.90 | -1.25 |
|    | cassava4.1_006018m.g | RNA.regulation of transcription.C2H2 zinc finger family                            | ZPR1 zinc-finger domain protein                                  | -0.82 | -0.71 | -1.08 | -1.42 | -0.17 | -0.32 | 0.12  | 0.18  | -0.08 | -0.23 |
|    | cassava4.1_015591m.g | RNA.regulation of transcription.bHLH,Basic Helix-Loop-Helix family                 | basic helix-loop-helix (bHLH)<br>DNA-binding superfamily protein | -1.13 | -2.37 | -1.56 | -2.53 | -0.23 | -2.24 | 0.30  | 0.14  | 1.79  | -0.03 |
|    | cassava4.1_007445m.g | RNA.regulation of transcription.MYB domain transcription factor family             | myb domain protein 55                                            | -2.58 | -3.51 | -3.26 | -2.87 | -1.09 | -2.66 | -0.99 | -2.40 | -0.79 | -1.87 |
|    | cassava4.1_002885m.g | RNA.regulation of transcription.ARF, Auxin Response Factor family                  | auxin response factor 9                                          | -0.69 | -1.65 | -0.29 | -1.56 | -0.26 | -0.79 | 0.32  | -1.29 | 0.04  | -0.64 |
|    | cassava4.1_011429m.g | RNA.regulation of transcription.MYB-related transcription factor family            | myb-like transcription factor family protein                     | -0.98 | -1.98 | -0.87 | -2.41 | -0.08 | -1.72 | 0.48  | -1.18 | -0.14 | -0.95 |
|    | cassava4.1_034105m.g | RNA.regulation of transcription.PWPP domain protein                                | ataxia-telangiectasia mutated                                    | -0.42 | -0.58 | -0.51 | -1.02 | -0.20 | -0.53 | 0.21  | -0.51 | 0.26  | -0.28 |
|    | cassava4.1_014358m.g | RNA.regulation of transcription.C2H2 zinc finger family                            | zinc finger protein 4                                            | -0.45 | -1.76 | -0.65 | -1.47 | 0.06  | -0.53 | -0.29 | -0.64 | -0.44 | -0.58 |
|    | cassava4.1_015213m.g | RNA.regulation of transcription.C2H2 zinc finger family                            | C2H2 and C2HC zinc fingers                                       | -0.50 | -2.98 | -0.62 | -2.28 | 0.05  | -1.24 | -0.31 | -1.39 | -0.57 | -1.14 |



|                      |                                                                                                        |                                                                  |                     |       |       |       |       |       |       |       |       |       |  |
|----------------------|--------------------------------------------------------------------------------------------------------|------------------------------------------------------------------|---------------------|-------|-------|-------|-------|-------|-------|-------|-------|-------|--|
|                      |                                                                                                        |                                                                  | superfamily protein |       |       |       |       |       |       |       |       |       |  |
| cassava4.1_004886m.g | RNA.regulation of transcription.bHLH,Basic Helix-Loop-Helix family                                     | basic helix-loop-helix (bHLH)<br>DNA-binding superfamily protein | -0.28               | -0.92 | -0.07 | -0.34 | 0.16  | -0.21 | 0.27  | -0.18 | 0.15  | -0.26 |  |
| cassava4.1_012303m.g | RNA.regulation of transcription.HSF,Heat-shock transcription factor family                             | heat shock transcription factor B2A                              | -0.26               | -1.23 | -0.43 | -0.73 | 0.08  | -0.50 | 0.32  | -0.36 | 0.02  | -0.43 |  |
| cassava4.1_014521m.g | RNA.regulation of transcription.Alfin-like                                                             | alfin-like 5                                                     | -0.25               | -0.85 | -0.29 | -0.84 | -0.13 | -0.04 | 0.04  | -0.04 | -0.13 | -0.21 |  |
| cassava4.1_009182m.g | RNA.regulation of transcription.SET-domain transcriptional regulator family                            | ASH1-related protein 2                                           | -0.85               | -2.95 | -0.83 | -2.24 | 0.22  | -0.97 | 0.70  | -0.13 | -0.03 | -0.18 |  |
| cassava4.1_002718m.g | RNA.regulation of transcription.GRAS transcription factor family                                       | GRAS family transcription factor                                 | 0.07                | -0.34 | 0.29  | 0.29  | 0.34  | 0.93  | 0.54  | 0.36  | 1.11  | 0.81  |  |
| cassava4.1_004194m.g | RNA.regulation of transcription.C2H2 zinc finger family                                                | indeterminate(ID)-domain 5                                       | 0.41                | -0.36 | 0.25  | -0.29 | 0.23  | -0.12 | -0.11 | 0.08  | 1.26  | 1.54  |  |
| cassava4.1_013453m.g | RNA.regulation of transcription.bHLH,Basic Helix-Loop-Helix family                                     | basic helix-loop-helix (bHLH)<br>DNA-binding superfamily protein | -0.66               | -2.11 | 0.06  | -0.47 | 0.31  | -0.08 | -0.13 | -0.43 | 1.37  | 1.49  |  |
| cassava4.1_016167m.g | RNA.regulation of transcription.AP2/EREBP, APETALA2/Ethylene-responsive element binding protein family | Integrase-type DNA-binding superfamily protein                   | -1.59               | -3.12 | -0.61 | -2.97 | -0.46 | -2.00 | -1.47 | -0.57 | 0.65  | 0.52  |  |
| cassava4.1_009138m.g | RNA.regulation of transcription.MYB domain transcription factor family                                 | myb domain protein 106                                           | -1.56               | -2.53 | -0.55 | -1.96 | -0.09 | -1.25 | -1.02 | -0.92 | 0.02  | -0.51 |  |
| cassava4.1_026975m.g | RNA.regulation of transcription.ARR                                                                    | response regulator 3                                             | -3.37               | -4.11 | -0.21 | -1.41 | 0.20  | -0.01 | -0.31 | -0.61 | -1.32 | -1.85 |  |
| cassava4.1_029813m.g | RNA.regulation of transcription.AS2,Lateral Organ Boundaries Gene Family                               | Lateral organ boundaries (LOB) domain family protein             | -1.85               | -2.18 | -1.67 | -1.25 | -0.33 | -1.13 | -0.61 | -0.62 | -1.10 | -1.07 |  |
| cassava4.1_017720m.g | RNA.regulation of transcription.bZIP transcription factor family                                       | Basic-leucine zipper (bZIP) transcription factor family protein  | -0.50               | -1.56 | -0.23 | -0.91 | 0.19  | 0.48  | -0.16 | 0.07  | -0.13 | -0.73 |  |
| cassava4.1_011296m.g | RNA.regulation of transcription.C2C2(Zn) GATA transcription factor family                              | cytokinin-responsive gata factor 1                               | -0.30               | -2.33 | -0.46 | -1.07 | 0.08  | -0.06 | -0.72 | -0.32 | -0.34 | -0.73 |  |
| cassava4.1_013034m.g | RNA.regulation of transcription.HB,Homeobox transcription factor family                                | Homeobox-leucine zipper protein 4 (HB-4) / HD-ZIP protein        | -1.37               | -3.55 | -1.26 | -1.98 | 0.36  | 0.05  | -1.21 | -0.96 | -0.52 | -0.97 |  |
| cassava4.1_015797m.g | RNA.regulation of transcription.ARR                                                                    | response regulator 5                                             | -1.00               | -5.80 | -1.25 | -1.93 | -0.63 | -0.40 | -0.90 | -1.43 | -2.42 | -3.46 |  |
| cassava4.1_018617m.g | RNA.regulation of transcription.C2C2(Zn) GATA transcription factor family                              | GATA transcription factor 15                                     | -0.49               | -1.81 | 0.26  | -0.47 | 0.05  | 0.27  | -0.47 | -0.15 | -0.52 | -0.57 |  |
| cassava4.1_012449m.g | RNA.regulation of transcription.MYB-related transcription factor family                                | myb-like transcription factor family protein                     | -0.25               | -2.26 | 0.42  | 0.24  | 0.08  | 0.57  | -0.20 | -0.41 | -0.07 | -0.69 |  |

|                      |                                                                                                        |                                                                                        |       |       |       |       |       |       |       |       |       |       |
|----------------------|--------------------------------------------------------------------------------------------------------|----------------------------------------------------------------------------------------|-------|-------|-------|-------|-------|-------|-------|-------|-------|-------|
| cassava4.1_030713m.g | RNA.regulation of transcription.C2C2(Zn) DOF zinc finger family                                        | cycling DOF factor 2                                                                   | -0.47 | -1.65 | -0.20 | -0.18 | 0.10  | 1.15  | 0.12  | -0.71 | -0.32 | -0.74 |
| cassava4.1_002464m.g | RNA.regulation of transcription.C3H zinc finger family                                                 | CCCH-type zinc finger protein with ARM repeat domain                                   | -0.11 | -0.95 | -0.07 | -0.40 | -0.03 | 0.43  | 0.50  | -0.56 | -0.04 | -0.27 |
| cassava4.1_012272m.g | RNA.regulation of transcription.MYB domain transcription factor family                                 | myb domain protein 20                                                                  | -1.57 | -2.54 | -0.55 | -1.33 | 0.15  | 0.13  | 0.22  | -1.35 | -0.18 | -1.36 |
| cassava4.1_016517m.g | RNA.regulation of transcription.bHLH,Basic Helix-Loop-Helix family                                     | basic helix-loop-helix (bHLH) DNA-binding superfamily protein                          | -0.78 | -2.75 | -0.06 | -1.22 | 0.12  | -0.08 | -0.58 | -1.43 | -0.46 | -0.93 |
| cassava4.1_015258m.g | RNA.regulation of transcription.C2C2(Zn) CO-like, Constans-like zinc finger family                     | B-box zinc finger family protein                                                       | -0.48 | -1.94 | -0.41 | -0.90 | 0.01  | -0.34 | -0.19 | -1.01 | -0.46 | -0.99 |
| cassava4.1_006065m.g | RNA.regulation of transcription.C2C2(Zn) DOF zinc finger family                                        | cycling DOF factor 2                                                                   | -0.23 | -1.34 | -0.18 | -0.59 | 0.13  | 0.23  | 0.01  | -0.56 | -0.18 | -0.68 |
| cassava4.1_014772m.g | RNA.regulation of transcription.AS2,Lateral Organ Boundaries Gene Family                               | LOB domain-containing protein 37                                                       | -1.11 | -4.49 | -0.55 | -0.46 | 0.01  | 0.42  | -1.14 | -2.56 | -0.80 | -1.52 |
| cassava4.1_002279m.g | RNA.regulation of transcription.HB,Homeobox transcription factor family                                | Homeobox-leucine zipper family protein / lipid-binding START domain-containing protein | -0.48 | -1.55 | -0.25 | -0.51 | 0.12  | 0.47  | -0.19 | -1.10 | -0.06 | -0.48 |
| cassava4.1_006069m.g | RNA.regulation of transcription.AP2/EREBP, APETALA2/Ethylene-responsive element binding protein family | related to AP2.7                                                                       | -0.44 | -2.33 | 0.26  | 0.16  | 0.26  | 0.05  | -0.31 | -0.51 | -0.21 | -0.03 |
| cassava4.1_016873m.g | RNA.regulation of transcription.Aux/IAA family                                                         | AUX/IAA transcriptional regulator family protein                                       | -1.07 | -4.42 | -0.77 | -1.64 | -0.36 | -1.15 | -1.14 | -1.94 | -1.09 | -1.15 |
| cassava4.1_009290m.g | RNA.regulation of transcription.bHLH,Basic Helix-Loop-Helix family                                     | cryptochrome-interacting basic-helix-loop-helix 1                                      | -2.28 | -6.15 | -1.06 | -1.58 | -0.65 | -1.25 | -0.73 | -3.07 | -0.40 | -1.82 |
| cassava4.1_014346m.g | RNA.regulation of transcription.C2C2(Zn) CO-like, Constans-like zinc finger family                     | B-box type zinc finger protein with CCT domain                                         | -1.32 | -3.91 | -1.35 | -0.79 | -0.19 | -0.10 | -0.18 | -1.60 | -0.18 | -1.16 |
| cassava4.1_031505m.g | RNA.regulation of transcription.TCP transcription factor family                                        | TEOSINTE BRANCHED 1, cycloidea and PCF transcription factor 3                          | -1.16 | -2.97 | -1.12 | -0.84 | -0.29 | -0.52 | -0.85 | -1.31 | -0.19 | -0.90 |
| cassava4.1_001154m.g | RNA.regulation of transcription.ARF, Auxin Response Factor family                                      | auxin response factor 6                                                                | 0.00  | 0.11  | 0.02  | -0.29 | -0.07 | -0.84 | -0.66 | -0.25 | -0.01 | -0.43 |
| cassava4.1_025153m.g | RNA.regulation of transcription.C2H2 zinc finger family                                                | C2H2-like zinc finger protein                                                          | -0.47 | -0.50 | -0.10 | -0.71 | -0.16 | -1.06 | -1.23 | -1.50 | -0.17 | -1.42 |
| cassava4.1_005370m.g | RNA.regulation of transcription.C2H2 zinc finger family                                                | indeterminate(ID)-domain 7                                                             | 0.06  | -0.01 | -0.27 | -0.60 | -0.27 | -0.84 | -0.21 | -0.93 | -0.16 | -0.40 |
| cassava4.1_030248m.g | RNA.regulation of transcription.AP2/EREBP,                                                             | AP2/B3 transcription factor family                                                     | 0.35  | 0.67  | -0.02 | -0.19 | -0.20 | -1.86 | 1.32  | -0.54 | 0.50  | -0.31 |

|                      |                                                                                                           |                                                                  |       |       |       |       |       |       |       |       |       |       |  |
|----------------------|-----------------------------------------------------------------------------------------------------------|------------------------------------------------------------------|-------|-------|-------|-------|-------|-------|-------|-------|-------|-------|--|
|                      | APETALA2/Ethylene-responsive element binding protein family                                               | protein                                                          |       |       |       |       |       |       |       |       |       |       |  |
| cassava4.1_014911m.g | RNA.regulation of transcription.MYB domain transcription factor family                                    | myb domain protein 48                                            | -0.09 | 0.28  | -0.63 | -0.98 | -0.17 | -1.20 | 0.33  | -0.98 | -0.12 | -0.82 |  |
| cassava4.1_011733m.g | RNA.regulation of transcription.C2C2(Zn) DOF zinc finger family                                           | OBF binding protein 4                                            | 0.02  | -0.64 | -0.58 | -1.73 | -0.27 | -2.01 | -0.11 | 0.03  | 0.24  | 0.02  |  |
| cassava4.1_029328m.g | RNA.regulation of transcription.AP2/EREBP,<br>APETALA2/Ethylene-responsive element binding protein family | cooperatively regulated by ethylene<br>and jasmonate 1           | 0.64  | 0.14  | 0.01  | -0.54 | -0.09 | -1.33 | 0.19  | 0.30  | 0.15  | -0.09 |  |
| cassava4.1_004716m.g | RNA.regulation of transcription.ARF, Auxin Response Factor family                                         | auxin response factor 10                                         | 0.17  | -0.19 | -0.22 | -0.48 | -0.10 | -1.46 | -0.19 | 0.02  | -0.21 | -0.83 |  |
| cassava4.1_013954m.g | RNA.regulation of transcription.HB,Homeobox transcription factor family                                   | Homeobox-leucine zipper protein<br>family                        | 0.15  | 0.31  | -0.67 | -1.10 | -0.62 | -1.84 | 0.02  | -0.25 | -0.33 | -1.15 |  |
| cassava4.1_001312m.g | RNA.regulation of transcription.Argonaute                                                                 | Argonaute family protein                                         | -0.03 | -0.19 | -0.04 | -0.41 | -0.06 | -0.91 | 0.00  | -0.30 | -0.02 | -0.45 |  |
| cassava4.1_005732m.g | RNA.regulation of transcription.SET-domain transcriptional regulator<br>family                            | Rubisco methyltransferase family<br>protein                      | 0.09  | 0.01  | -0.24 | -1.08 | -0.04 | -1.62 | -0.55 | -0.57 | -0.18 | -0.78 |  |
| cassava4.1_013010m.g | RNA.regulation of transcription.MYB-related transcription factor family                                   | Duplicated homeodomain-like<br>superfamily protein               | -0.23 | -0.83 | 0.08  | -0.19 | 0.12  | -0.88 | -0.61 | -0.15 | -0.50 | -0.93 |  |
| cassava4.1_016343m.g | RNA.regulation of transcription.AP2/EREBP,<br>APETALA2/Ethylene-responsive element binding protein family | Integrase-type DNA-binding<br>superfamily protein                | -0.45 | -2.42 | 1.38  | -0.45 | 0.43  | -1.26 | -2.63 | -0.26 | 0.65  | -1.69 |  |
| cassava4.1_003646m.g | RNA.regulation of transcription.bHLH,Basic Helix-Loop-Helix family                                        | basic helix-loop-helix (bHLH)<br>DNA-binding superfamily protein | -0.52 | -1.44 | -0.01 | -0.57 | -0.08 | -1.24 | -0.99 | -0.86 | 0.15  | -0.63 |  |
| cassava4.1_009755m.g | RNA.regulation of transcription.Aux/IAA family                                                            | indole-3-acetic acid inducible 9                                 | -0.83 | -1.91 | -0.42 | -1.24 | -0.29 | -0.88 | -1.34 | -1.69 | -0.13 | -1.23 |  |
| cassava4.1_014818m.g | RNA.regulation of transcription.HB,Homeobox transcription factor family                                   | Homeobox-leucine zipper protein<br>family                        | -1.09 | -1.62 | -0.30 | -1.07 | -0.14 | -1.09 | -1.31 | -1.37 | -0.20 | -1.01 |  |
| cassava4.1_032473m.g | RNA.regulation of transcription.AP2/EREBP,<br>APETALA2/Ethylene-responsive element binding protein family | ethylene responsive element binding<br>factor 6                  | -1.31 | -3.51 | 0.88  | -2.74 | 0.21  | -2.16 | -2.02 | -0.50 | 0.20  | -3.31 |  |
| cassava4.1_013214m.g | RNA.regulation of transcription.AP2/EREBP,<br>APETALA2/Ethylene-responsive element binding protein family | Integrase-type DNA-binding<br>superfamily protein                | -0.89 | -3.46 | 1.03  | -1.42 | 0.38  | -1.65 | -0.30 | -0.07 | 0.90  | -2.24 |  |
| cassava4.1_009548m.g | RNA.regulation of transcription.GRAS transcription factor family                                          | GRAS family transcription factor                                 | 0.70  | -1.97 | 2.36  | 1.30  | 0.91  | -0.36 | 0.75  | 1.56  | 1.43  | -0.04 |  |
| cassava4.1_004517m.g | RNA.regulation of transcription.TCP transcription factor family                                           | TEOSINTE BRANCHED 1, cycloidea<br>and PCF transcription factor 3 | -0.13 | -1.28 | -0.32 | -0.55 | -0.16 | -0.73 | -0.48 | -0.28 | -0.16 | -0.50 |  |
| cassava4.1_008459m.g | RNA.regulation of transcription.bZIP transcription factor family                                          | G-box binding factor 3                                           | -0.32 | -1.18 | -0.03 | -0.48 | -0.39 | -0.40 | 0.30  | 0.16  | -0.25 | -0.81 |  |

|                      |                                                                                                           |                                                                             |       |       |       |       |       |       |       |       |       |       |
|----------------------|-----------------------------------------------------------------------------------------------------------|-----------------------------------------------------------------------------|-------|-------|-------|-------|-------|-------|-------|-------|-------|-------|
| cassava4.1_005881m.g | RNA.regulation of transcription.bHLH,Basic Helix-Loop-Helix family                                        | phytochrome interacting factor 3-like 1                                     | -0.83 | -2.29 | -0.35 | -1.32 | -0.09 | -0.62 | 0.29  | -1.15 | -0.74 | -2.88 |
| cassava4.1_001542m.g | RNA.regulation of transcription.ARF, Auxin Response Factor family                                         | auxin response factor 2                                                     | -0.14 | -0.81 | -0.25 | -0.79 | -0.10 | -0.77 | 0.58  | -0.39 | -0.07 | -1.55 |
| cassava4.1_007247m.g | RNA.regulation of transcription.E2F/DP transcription factor family                                        | E2F transcription factor 1                                                  | -0.65 | -1.20 | -0.16 | -1.04 | -0.32 | -0.89 | 0.81  | -1.08 | -0.41 | -1.52 |
| cassava4.1_021075m.g | RNA.regulation of transcription.AP2/EREBP,<br>APETALA2/Ethylene-responsive element binding protein family | unknow                                                                      | 0.12  | -1.24 | -0.63 | -2.37 | 0.06  | -2.48 | 1.50  | -0.24 | -0.07 | -1.16 |
| cassava4.1_010627m.g | RNA.regulation of transcription.CCAAT box binding factor family, HAP2                                     | nuclear factor Y, subunit A1                                                | 0.35  | -0.27 | -0.50 | -1.60 | 0.09  | -0.51 | 0.59  | 0.13  | -0.48 | -0.72 |
| cassava4.1_024442m.g | RNA.regulation of transcription.bHLH,Basic Helix-Loop-Helix family                                        | basic helix-loop-helix (bHLH)<br>DNA-binding superfamily protein            | 0.08  | -1.96 | -0.83 | -1.58 | -0.23 | -1.18 | 0.31  | -0.63 | -0.94 | -1.93 |
| cassava4.1_011611m.g | RNA.regulation of transcription.C2C2(Zn) DOF zinc finger family                                           | OBF binding protein 4                                                       | -0.23 | -1.06 | -0.49 | -1.33 | -0.08 | -0.49 | -0.29 | -0.35 | -0.69 | -1.18 |
| cassava4.1_010201m.g | RNA.regulation of transcription.HSF,Heat-shock transcription factor family                                | heat shock transcription factor C1                                          | -0.07 | -1.40 | -0.31 | -1.40 | 0.14  | -1.10 | 0.02  | 0.24  | -0.30 | -0.95 |
| cassava4.1_015454m.g | RNA.regulation of transcription.MADS box transcription factor family                                      | K-box region and MADS-box<br>transcription factor family protein            | 0.26  | 0.31  | 0.36  | 0.06  | -0.07 | 0.29  | 1.02  | 0.36  | -0.24 | -0.63 |
| cassava4.1_008877m.g | RNA.regulation of transcription.bHLH,Basic Helix-Loop-Helix family                                        | basic helix-loop-helix (bHLH)<br>DNA-binding superfamily protein            | 0.05  | -0.16 | 0.02  | -0.66 | 0.00  | -0.86 | 1.07  | -0.79 | -0.19 | -1.17 |
| cassava4.1_009601m.g | RNA.regulation of transcription.General Transcription                                                     | RNA polymerase III RPC4                                                     | -0.08 | 0.10  | -0.33 | -0.48 | 0.01  | -0.52 | 0.56  | -0.67 | -0.48 | -0.94 |
| cassava4.1_013975m.g | RNA.regulation of transcription.MADS box transcription factor family                                      | K-box region and MADS-box<br>transcription factor family protein            | -0.05 | 0.08  | -0.12 | -0.34 | -0.07 | -0.49 | 1.20  | -0.15 | -0.13 | -1.24 |
| cassava4.1_002453m.g | RNA.regulation of transcription.HB,Homeobox transcription factor family                                   | homeodomain GLABROUS 2                                                      | -0.29 | -0.03 | -0.28 | -0.26 | 0.04  | -0.20 | 1.13  | -0.33 | 0.18  | -0.64 |
| cassava4.1_001456m.g | RNA.regulation of transcription.PHD finger transcription factor                                           | Acyl-CoA N-acyltransferase with<br>RING/FYVE/PHD-type zinc finger<br>domain | -0.18 | -0.16 | -0.35 | -0.52 | -0.15 | -0.34 | 0.86  | -0.01 | 0.04  | -0.42 |
| cassava4.1_015815m.g | RNA.regulation of transcription.ARR                                                                       | response regulator 9                                                        | -1.09 | -1.38 | -0.64 | -0.80 | 0.05  | -1.60 | -0.39 | -1.56 | -0.56 | -2.69 |
| cassava4.1_017624m.g | RNA.regulation of transcription.Aux/IAA family                                                            | AUX/IAA transcriptional regulator<br>family protein                         | -0.21 | -1.00 | -0.27 | -0.65 | -0.07 | -1.19 | 0.06  | -1.25 | -0.94 | -2.47 |
| cassava4.1_003856m.g | RNA.regulation of transcription.bHLH,Basic Helix-Loop-Helix family                                        | basic helix-loop-helix (bHLH)<br>DNA-binding superfamily protein            | 0.56  | 0.00  | 0.66  | 0.75  | 0.36  | -0.55 | -0.06 | -0.81 | 0.11  | -1.52 |
| cassava4.1_010425m.g | RNA.regulation of transcription.G2-like transcription factor family, GARP                                 | Homeodomain-like superfamily<br>protein                                     | 0.16  | -0.57 | 0.20  | -0.58 | -0.09 | -1.55 | -0.25 | -1.13 | -0.46 | -1.52 |

|                      |                                                                                                           |                                                                                              |       |       |       |       |       |       |       |       |       |       |
|----------------------|-----------------------------------------------------------------------------------------------------------|----------------------------------------------------------------------------------------------|-------|-------|-------|-------|-------|-------|-------|-------|-------|-------|
| cassava4.1_015098m.g | RNA.regulation of transcription.bHLH,Basic Helix-Loop-Helix family                                        | basic helix-loop-helix (bHLH)<br>DNA-binding superfamily protein                             | 0.14  | -0.19 | -0.07 | -0.27 | -0.11 | -0.49 | -0.24 | -0.97 | -0.16 | -0.90 |
| cassava4.1_022485m.g | RNA.regulation of transcription.Chromatin Remodeling Factors                                              | SWITCH/sucrose nonfermenting 3C                                                              | -0.09 | -0.08 | -0.09 | -0.14 | -0.05 | -0.19 | -0.35 | -1.47 | -0.17 | -0.83 |
| cassava4.1_000922m.g | RNA.regulation of transcription.NIN-like bZIP-related family                                              | NIN like protein 7                                                                           | 0.09  | 0.24  | -0.33 | -0.08 | 0.04  | -0.22 | -0.03 | -1.73 | -0.06 | -0.97 |
| cassava4.1_008682m.g | RNA.regulation of transcription.bHLH,Basic Helix-Loop-Helix family                                        | basic helix-loop-helix (bHLH)<br>DNA-binding superfamily protein                             | -0.37 | -0.61 | -0.30 | -0.09 | -0.20 | -0.07 | -0.09 | -1.46 | -0.48 | -0.94 |
| cassava4.1_012977m.g | RNA.regulation of transcription.G2-like transcription factor family, GARP                                 | phosphate starvation response 1                                                              | -0.52 | -1.26 | -0.32 | -0.47 | -0.05 | -0.34 | -0.60 | -2.53 | -0.28 | -1.35 |
| cassava4.1_030151m.g | RNA.regulation of transcription.G2-like transcription factor family, GARP                                 | Homeodomain-like superfamily<br>protein                                                      | -0.45 | -0.91 | -0.39 | -0.70 | -0.32 | -0.26 | -0.61 | -1.42 | -0.30 | -0.96 |
| cassava4.1_010526m.g | RNA.regulation of transcription.AP2/EREBP,<br>APETALA2/Ethylene-responsive element binding protein family | related to AP2 4                                                                             | -0.22 | -0.45 | -0.27 | -0.41 | 0.04  | 0.32  | -0.66 | -2.31 | -0.10 | -1.48 |
| cassava4.1_001772m.g | RNA.regulation of transcription.HB,Homeobox transcription factor family                                   | Homeobox-leucine zipper family<br>protein / lipid-binding START<br>domain-containing protein | -0.10 | -0.45 | -0.23 | -0.27 | -0.19 | 0.17  | -0.11 | -1.36 | -0.12 | -0.70 |
| cassava4.1_002969m.g | RNA.regulation of transcription.ARF, Auxin Response Factor family                                         | auxin response factor 1                                                                      | -0.26 | -0.38 | -0.10 | -0.45 | 0.11  | -0.20 | -0.05 | -0.90 | -0.36 | -0.59 |
| cassava4.1_004983m.g | RNA.regulation of transcription.C2H2 zinc finger family                                                   | indeterminate(ID)-domain 7                                                                   | -0.17 | -0.44 | -0.08 | -0.55 | 0.06  | 0.01  | 0.11  | -0.93 | -0.19 | -0.83 |
| cassava4.1_014024m.g | RNA.regulation of transcription.CCAAT box binding factor family, HAP5                                     | nuclear factor Y, subunit C2                                                                 | -0.33 | -0.94 | -0.32 | -0.76 | 0.00  | -0.23 | -0.13 | -1.73 | -0.38 | -1.64 |
| cassava4.1_004443m.g | RNA.regulation of transcription.C2H2 zinc finger family                                                   | indeterminate(ID)-domain 5                                                                   | 0.22  | -0.63 | 0.08  | -0.62 | 0.04  | -0.10 | 0.02  | -1.49 | 0.21  | -0.55 |
| cassava4.1_002166m.g | RNA.regulation of transcription.HB,Homeobox transcription factor family                                   | homeodomain GLABROUS 2                                                                       | -0.12 | -0.41 | -0.40 | -0.48 | -0.17 | -0.28 | -0.14 | -0.90 | -0.21 | -0.66 |
| cassava4.1_023381m.g | RNA.regulation of transcription.Nucleosome/chromatin assembly factor<br>group                             | HMG (high mobility group) box<br>protein with ARID/BRIGHT<br>DNA-binding domain              | 0.11  | -0.40 | -0.23 | -0.57 | 0.02  | -0.11 | -0.28 | -1.80 | -0.03 | -0.99 |
| cassava4.1_019292m.g | RNA.regulation of transcription.Aux/IAA family                                                            | unknow                                                                                       | -0.34 | -1.61 | -0.71 | -0.73 | -0.30 | -0.88 | -0.97 | -2.47 | -0.99 | -2.15 |
| cassava4.1_005159m.g | RNA.regulation of transcription.bHLH,Basic Helix-Loop-Helix family                                        | basic helix-loop-helix (bHLH)<br>DNA-binding superfamily protein                             | -0.31 | -1.77 | 0.09  | -0.20 | 0.32  | -1.21 | -0.09 | -2.45 | 0.03  | -3.53 |
| cassava4.1_006801m.g | RNA.regulation of transcription.C2C2(Zn) DOF zinc finger family                                           | cyclizing DOF factor 3                                                                       | -0.50 | -1.54 | -0.46 | -0.89 | -0.31 | -1.03 | -0.89 | -2.04 | -0.52 | -2.23 |
| cassava4.1_007759m.g | RNA.regulation of transcription.C2H2 zinc finger family                                                   | zinc finger protein 1                                                                        | -0.44 | -1.18 | -0.13 | -0.48 | -0.01 | -0.45 | -0.19 | -1.57 | -0.39 | -1.27 |
| cassava4.1_007787m.g | RNA.regulation of transcription.C2H2 zinc finger family                                                   | zinc finger protein 1                                                                        | -0.38 | -1.30 | -0.26 | -0.45 | -0.12 | -0.69 | -0.09 | -1.75 | -0.28 | -1.63 |

|                      |                                                                           |                                                                          |       |       |       |       |       |       |       |       |       |       |
|----------------------|---------------------------------------------------------------------------|--------------------------------------------------------------------------|-------|-------|-------|-------|-------|-------|-------|-------|-------|-------|
| cassava4.1_013797m.g | RNA.regulation of transcription.bZIP transcription factor family          | Basic-leucine zipper (bZIP)<br>transcription factor family protein       | -0.42 | -0.83 | -0.21 | -0.67 | -0.03 | -0.66 | -0.28 | -1.69 | -0.41 | -1.54 |
| cassava4.1_006206m.g | RNA.regulation of transcription.C2H2 zinc finger family                   | indeterminate(ID)-domain 5                                               | -0.10 | -0.77 | 0.27  | -0.68 | -0.01 | -0.44 | -0.11 | -1.63 | -0.13 | -1.23 |
| cassava4.1_011554m.g | RNA.regulation of transcription.bHLH,Basic Helix-Loop-Helix family        | basic helix-loop-helix (bHLH)<br>DNA-binding superfamily protein         | -0.36 | -0.99 | 0.09  | -0.17 | 0.20  | 0.09  | -0.62 | -1.32 | -0.42 | -1.54 |
| cassava4.1_009052m.g | RNA.regulation of transcription.G2-like transcription factor family, GARP | Homeodomain-like superfamily<br>protein                                  | -0.16 | -1.60 | 0.30  | -0.89 | 0.01  | -0.34 | -0.85 | -2.04 | -0.79 | -2.26 |
| cassava4.1_007443m.g | RNA.regulation of transcription.PHOR1                                     | ARM repeat superfamily protein                                           | -0.73 | -0.99 | -0.15 | -0.35 | 0.02  | -0.47 | -1.11 | -2.06 | -0.32 | -2.11 |
| cassava4.1_002303m.g | RNA.regulation of transcription.GRAS transcription factor family          | GRAS family transcription factor                                         | -0.08 | -0.45 | -0.33 | -1.01 | -0.40 | -0.21 | 0.29  | -1.37 | -0.41 | -1.68 |
| cassava4.1_034237m.g | RNA.regulation of transcription.TCP transcription factor family           | TEOSINTE BRANCHED 1,<br>cycloidea, PCF (TCP)-domain family<br>protein 20 | -0.81 | -0.77 | -0.85 | -0.74 | -0.05 | -0.48 | -0.04 | -1.93 | -0.71 | -2.47 |
| cassava4.1_004904m.g | RNA.regulation of transcription.General Transcription                     | tetratricopeptide repeat<br>(TPR)-containing protein                     | 0.18  | 0.47  | -0.38 | -0.74 | 0.39  | -0.23 | 0.25  | -0.68 | -0.44 | -1.38 |
| cassava4.1_008876m.g | RNA.regulation of transcription.C2H2 zinc finger family                   | C2H2-like zinc finger protein                                            | 0.17  | -0.07 | -0.22 | -0.86 | 0.18  | -0.45 | -0.85 | -1.19 | -0.52 | -1.73 |
| cassava4.1_013986m.g | RNA.regulation of transcription.HB,Homeobox transcription factor family   | Homeobox-leucine zipper protein<br>family                                | -0.44 | 0.03  | -0.21 | -0.57 | 0.08  | -0.80 | -0.48 | -1.39 | -0.59 | -1.90 |
| cassava4.1_011931m.g | RNA.regulation of transcription.MYB-related transcription factor family   | Homeodomain-like superfamily<br>protein                                  | -0.06 | -0.15 | -0.16 | -0.79 | -0.02 | -0.50 | -0.17 | -1.25 | -0.65 | -1.45 |
| cassava4.1_010816m.g | RNA.regulation of transcription.TCP transcription factor family           | plastid transcription factor 1                                           | 0.14  | -0.19 | -0.02 | -0.31 | 0.17  | 0.00  | -0.08 | -0.69 | -0.68 | -0.99 |
| cassava4.1_011084m.g | RNA.regulation of transcription.G2-like transcription factor family, GARP | Homeodomain-like superfamily<br>protein                                  | -0.83 | -1.26 | -0.53 | -0.44 | 0.58  | -0.93 | 0.42  | -1.81 | -0.79 | -1.31 |
| cassava4.1_009038m.g | RNA.regulation of transcription.G2-like transcription factor family, GARP | myb-like transcription factor family<br>protein                          | -0.92 | -1.20 | 0.26  | 0.51  | -0.01 | 0.07  | 0.14  | -2.11 | -0.22 | -1.18 |
| cassava4.1_013116m.g | RNA.regulation of transcription.MYB-related transcription factor family   | Homeodomain-like/winged-helix<br>DNA-binding family protein              | -0.53 | -0.64 | 0.17  | 0.02  | 0.06  | -0.36 | 0.14  | -1.03 | -0.18 | -0.72 |
| cassava4.1_012931m.g | RNA.regulation of transcription.MYB domain transcription factor family    | myb domain protein 7                                                     | -1.03 | -0.84 | -0.12 | -0.55 | -0.30 | -0.67 | 0.06  | -1.37 | -0.39 | -1.51 |
| cassava4.1_006787m.g | RNA.regulation of transcription.Bromodomain proteins                      | bromodomain 4                                                            | 0.04  | -0.31 | 0.31  | 0.06  | -0.07 | -0.30 | 0.35  | -1.42 | -0.25 | -1.50 |

|                      |                                                                                                   |                                                                                                  |       |       |       |       |       |       |       |       |       |       |
|----------------------|---------------------------------------------------------------------------------------------------|--------------------------------------------------------------------------------------------------|-------|-------|-------|-------|-------|-------|-------|-------|-------|-------|
| cassava4.1_031076m.g | RNA.regulation of transcription.SET-domain transcriptional regulator family                       | SET domain protein 14                                                                            | -0.30 | -0.50 | 0.05  | 0.04  | -0.01 | -0.27 | 0.47  | -1.24 | -0.16 | -1.05 |
| cassava4.1_030224m.g | RNA.regulation of transcription.Trihelix, Triple-Helix transcription factor family                | Duplicated homeodomain-like superfamily protein                                                  | -0.39 | -0.04 | -0.06 | -0.39 | 0.19  | -0.43 | 0.08  | -1.08 | -0.12 | -0.54 |
| cassava4.1_031977m.g | RNA.regulation of transcription.C2C2(Zn) YABBY family                                             | plant-specific transcription factor YABBY family protein                                         | -0.69 | -0.86 | -0.04 | -0.25 | -0.10 | -1.33 | -0.06 | -1.56 | -0.41 | -1.23 |
| cassava4.1_002216m.g | RNA.regulation of transcription.ARF, Auxin Response Factor family                                 | auxin response factor 2                                                                          | -0.50 | -0.39 | -0.26 | -0.77 | -0.24 | -1.28 | -0.21 | -1.29 | -0.22 | -0.96 |
| cassava4.1_000076m.g | RNA.regulation of transcription.Chromatin Remodeling Factors                                      | DNA binding;ATP binding;nucleic acid binding;binding;helicases;ATP binding;DNA binding;helicases | 0.05  | 0.16  | 0.18  | 0.07  | -0.06 | -0.57 | 0.33  | -1.08 | 0.13  | -0.29 |
| cassava4.1_025037m.g | RNA.regulation of transcription.Trihelix, Triple-Helix transcription factor family                | Duplicated homeodomain-like superfamily protein                                                  | -0.30 | -0.19 | 0.06  | -0.33 | -0.18 | -0.93 | -0.03 | -1.16 | -0.26 | -0.68 |
| cassava4.1_007837m.g | RNA.regulation of transcription.bZIP transcription factor family                                  | bZIP transcription factor family protein                                                         | -0.24 | -1.30 | -0.23 | -0.31 | -0.33 | -0.97 | -0.08 | -2.39 | -0.36 | -1.23 |
| cassava4.1_000316m.g | RNA.regulation of transcription.Chromatin Remodeling Factors                                      | SNF2 domain-containing protein / helicase domain-containing protein / F-box family protein       | -0.18 | -0.72 | 0.29  | 0.12  | 0.19  | -0.41 | 0.24  | -1.41 | 0.11  | -0.41 |
| cassava4.1_007149m.g | RNA.regulation of transcription.G2-like transcription factor family, GARP                         | Homeodomain-like superfamily protein                                                             | -0.41 | -0.70 | -0.16 | -0.48 | -0.18 | -0.70 | -0.03 | -1.42 | -0.08 | -0.89 |
| cassava4.1_023603m.g | RNA.regulation of transcription.HB,Homeobox transcription factor family                           | BEL1-like homeodomain 2                                                                          | -0.16 | -0.63 | 0.03  | -0.32 | -0.01 | -0.49 | 0.12  | -1.29 | -0.08 | -0.66 |
| cassava4.1_000754m.g | RNA.regulation of transcription.C3H zinc finger family                                            | zinc knuckle (CCHC-type) family protein                                                          | -0.48 | -0.88 | -0.30 | -0.54 | -0.22 | -1.17 | 0.33  | -1.70 | -0.15 | -1.33 |
| cassava4.1_033475m.g | RNA.regulation of transcription.MADS box transcription factor family                              | unclear                                                                                          | -0.53 | -1.41 | -0.32 | -1.01 | -0.37 | -2.18 | 0.03  | -3.26 | -0.12 | -2.34 |
| cassava4.1_001790m.g | RNA.regulation of transcription.HB,Homeobox transcription factor family                           | BEL1-like homeodomain 2                                                                          | 0.05  | -0.14 | -0.06 | -0.10 | 0.01  | -0.25 | 0.20  | -1.11 | -0.13 | -0.34 |
| cassava4.1_001576m.g | RNA.regulation of transcription.ABI3/VP1-related B3-domain-containing transcription factor family | high-level expression of sugar-inducible gene 2                                                  | 0.11  | 0.06  | 0.19  | 0.40  | 0.09  | -0.27 | 0.37  | -1.16 | 0.13  | -0.57 |
| cassava4.1_000609m.g | RNA.regulation of transcription.ARF, Auxin Response Factor family                                 | auxin response factor 19                                                                         | -0.99 | -1.31 | -0.39 | -0.59 | -0.35 | -0.97 | -0.20 | -3.01 | -0.27 | -1.50 |
| cassava4.1_003781m.g | RNA.regulation of transcription.Trihelix, Triple-Helix transcription factor family                | Duplicated homeodomain-like superfamily protein                                                  | -0.48 | -0.32 | -0.04 | -0.10 | -0.04 | -0.62 | 0.06  | -1.55 | 0.03  | -0.85 |

|                      |                                                                                                        |                                                                    |       |       |       |       |       |       |       |       |       |       |
|----------------------|--------------------------------------------------------------------------------------------------------|--------------------------------------------------------------------|-------|-------|-------|-------|-------|-------|-------|-------|-------|-------|
| cassava4.1_011813m.g | RNA.regulation of transcription.bZIP transcription factor family                                       | bZIP transcription factor family protein                           | -0.35 | -0.46 | -0.41 | -1.96 | 0.24  | -0.99 | -0.14 | -1.83 | -0.46 | -1.23 |
| cassava4.1_011886m.g | RNA.regulation of transcription.C2C2(Zn) GATA transcription factor family                              | GATA transcription factor 5                                        | -0.20 | -0.81 | -0.41 | -1.29 | -0.04 | -1.50 | -0.58 | -1.84 | -0.62 | -1.35 |
| cassava4.1_013480m.g | RNA.regulation of transcription.HB,Homeobox transcription factor family                                | homeobox 1                                                         | -0.15 | -2.57 | -0.64 | -2.87 | 0.18  | -2.42 | -0.89 | -3.14 | -0.12 | -1.41 |
| cassava4.1_013746m.g | RNA.regulation of transcription.MYB-related transcription factor family                                | myb-like transcription factor family protein                       | -0.34 | -2.43 | -1.31 | -3.13 | -0.08 | -3.04 | -1.15 | -3.96 | -0.20 | -2.33 |
| cassava4.1_024212m.g | RNA.regulation of transcription.TCP transcription factor family                                        | TEOSINTE BRANCHED, cycloidea and PCF (TCP) 14                      | 0.22  | -0.24 | -0.86 | -1.60 | -0.23 | -0.80 | -0.57 | -1.07 | -0.59 | -1.21 |
| cassava4.1_017926m.g | RNA.regulation of transcription.Nucleosome/chromatin assembly factor group                             | high mobility group B3                                             | 0.06  | -0.77 | -0.54 | -1.18 | -0.02 | -1.04 | -0.45 | -0.55 | -0.73 | -1.90 |
| cassava4.1_013973m.g | RNA.regulation of transcription.MYB-related transcription factor family                                | myb-like transcription factor family protein                       | 0.22  | -0.33 | -0.13 | -0.72 | -0.02 | -0.37 | -0.31 | -0.34 | -0.55 | -1.28 |
| cassava4.1_018525m.g | RNA.regulation of transcription.Nucleosome/chromatin assembly factor group                             | high mobility group B3                                             | 0.06  | -0.38 | -0.41 | -0.76 | 0.02  | -0.46 | -0.33 | -0.24 | -0.82 | -1.68 |
| cassava4.1_008584m.g | RNA.regulation of transcription.General Transcription                                                  | Transcription factor IIA, alpha/beta subunit                       | -0.07 | -0.43 | -0.40 | -0.65 | -0.01 | -0.67 | -0.07 | -0.53 | -0.28 | -1.11 |
| cassava4.1_012505m.g | RNA.regulation of transcription.MYB domain transcription factor family                                 | myb domain protein 31                                              | -0.12 | -1.01 | -0.13 | -1.27 | 0.23  | -1.24 | -0.33 | -0.97 | -0.58 | -1.86 |
| cassava4.1_014431m.g | RNA.regulation of transcription.Aux/IAA family                                                         | indole-3-acetic acid inducible 11                                  | 0.11  | -0.47 | -0.70 | -1.74 | -0.29 | -1.21 | -0.21 | -1.20 | -0.79 | -1.89 |
| cassava4.1_033803m.g | RNA.regulation of transcription.AP2/EREBP, APETALA2/Ethylene-responsive element binding protein family | cooperatively regulated by ethylene and jasmonate 1                | -0.08 | -0.13 | -0.26 | -0.92 | 0.08  | -0.95 | 0.17  | -0.77 | -0.31 | -1.40 |
| cassava4.1_012485m.g | RNA.regulation of transcription.TCP transcription factor family                                        | TEOSINTE BRANCHED 1, cycloidea, PCF (TCP)-domain family protein 20 | -0.11 | -0.34 | -0.24 | -1.12 | -0.20 | -0.97 | -0.19 | -0.98 | -0.28 | -1.27 |
| cassava4.1_015642m.g | RNA.regulation of transcription.bHLH,Basic Helix-Loop-Helix family                                     | basic helix-loop-helix (bHLH) DNA-binding superfamily protein      | -0.92 | -2.17 | -1.58 | -1.87 | -0.16 | -1.61 | -1.12 | -1.17 | 0.31  | -1.34 |
| cassava4.1_006867m.g | RNA.regulation of transcription.bHLH,Basic Helix-Loop-Helix family                                     | basic helix-loop-helix (bHLH) DNA-binding superfamily protein      | -0.51 | -1.06 | -0.48 | -0.91 | 0.19  | -0.66 | -0.62 | -0.51 | -0.15 | -0.73 |
| cassava4.1_008593m.g | RNA.regulation of transcription.C2C2(Zn) CO-like, Constans-like zinc                                   | chloroplast import apparatus 2                                     | -0.62 | -0.88 | -0.77 | -1.64 | -0.08 | -1.37 | -0.79 | -0.60 | 0.01  | -0.77 |



|                      |                                                                                                        |                                                |       |       |       |       |       |       |       |       |       |       |  |
|----------------------|--------------------------------------------------------------------------------------------------------|------------------------------------------------|-------|-------|-------|-------|-------|-------|-------|-------|-------|-------|--|
|                      |                                                                                                        | finger family                                  |       |       |       |       |       |       |       |       |       |       |  |
| cassava4.1_013177m.g | RNA.regulation of transcription.HB,Homeobox transcription factor family                                | homeobox protein 2                             | -0.61 | -1.53 | -0.29 | -1.93 | 0.04  | -1.28 | -0.54 | -0.64 | 0.11  | -1.03 |  |
| cassava4.1_001995m.g | RNA.regulation of transcription.ARF, Auxin Response Factor family                                      | auxin response factor 4                        | -0.21 | -0.65 | 0.17  | -0.97 | 0.21  | -1.49 | -0.50 | -1.29 | 0.44  | -0.45 |  |
| cassava4.1_012160m.g | RNA.regulation of transcription.G2-like transcription factor family, GARP                              | Homeodomain-like superfamily protein           | -0.68 | -1.44 | -0.39 | -1.50 | 0.06  | -1.47 | -0.83 | -1.35 | 0.03  | -0.48 |  |
| cassava4.1_016852m.g | RNA.regulation of transcription.C2H2 zinc finger family                                                | zinc finger protein 7                          | -0.74 | -1.87 | -0.54 | -2.09 | 0.05  | -2.80 | -0.81 | -1.08 | -0.38 | -1.61 |  |
| cassava4.1_032952m.g | RNA.regulation of transcription.bZIP transcription factor family                                       | TraB family protein                            | -0.83 | -1.60 | -0.23 | -1.02 | 0.02  | -2.72 | -0.25 | -1.86 | -0.15 | -1.63 |  |
| cassava4.1_002286m.g | RNA.regulation of transcription.HSF,Heat-shock transcription factor family                             | Nucleic acid-binding, OB-fold-like protein     | -0.61 | -0.97 | -0.12 | -1.12 | -0.05 | -1.71 | -0.33 | -1.08 | -0.22 | -0.76 |  |
| cassava4.1_014928m.g | RNA.regulation of transcription.Aux/IAA family                                                         | indole-3-acetic acid inducible 14              | -0.29 | -1.29 | -0.49 | -1.09 | -0.30 | -1.28 | -1.02 | -1.13 | -0.68 | -1.48 |  |
| cassava4.1_028782m.g | RNA.regulation of transcription.AP2/EREBP, APETALA2/Ethylene-responsive element binding protein family | Integrase-type DNA-binding superfamily protein | -0.27 | -2.16 | -0.92 | -1.97 | -0.01 | -0.60 | -1.01 | -1.84 | -0.64 | -2.53 |  |
| cassava4.1_014217m.g | RNA.regulation of transcription.C2C2(Zn) DOF zinc finger family                                        | Protein of unknown function (DUF688)           | -0.01 | -1.88 | -0.02 | -1.42 | 0.20  | -0.63 | -0.67 | -1.18 | -0.42 | -1.34 |  |
| cassava4.1_003741m.g | RNA.regulation of transcription.GRAS transcription factor family                                       | RGA-like 2                                     | -0.47 | -1.75 | -0.53 | -1.19 | -0.12 | -0.90 | -0.73 | -1.27 | -0.62 | -0.96 |  |
| cassava4.1_028288m.g | RNA.regulation of transcription.C2C2(Zn) CO-like, Constans-like zinc finger family                     | B-box type zinc finger protein with CCT domain | -1.81 | -5.01 | 0.08  | -2.08 | -0.21 | -3.08 | 0.00  | -2.48 | -0.42 | -2.39 |  |
| cassava4.1_025708m.g | RNA.regulation of transcription.bHLH,Basic Helix-Loop-Helix family                                     | phytochrome interacting factor 3-like 5        | -0.57 | -1.96 | -0.32 | -0.63 | -0.10 | -1.44 | 0.02  | -1.25 | -0.41 | -1.26 |  |
| cassava4.1_010785m.g | RNA.regulation of transcription.C2H2 zinc finger family                                                | C2H2-type zinc finger family protein           | -1.38 | -3.58 | -0.94 | -1.36 | -0.67 | -2.99 | -1.19 | -2.19 | -1.19 | -2.26 |  |
| cassava4.1_028748m.g | RNA.regulation of transcription.HSF,Heat-shock transcription factor family                             | heat shock transcription factor A3             | -0.38 | -1.50 | 0.03  | -0.45 | 0.10  | -0.99 | -0.19 | -0.71 | -0.30 | -1.35 |  |
| cassava4.1_015068m.g | RNA.regulation of transcription.C2C2(Zn) CO-like, Constans-like zinc finger family                     | salt tolerance homologue                       | -0.77 | -2.59 | -0.32 | -1.45 | 0.09  | -1.01 | 0.08  | -1.11 | -0.62 | -1.65 |  |
| cassava4.1_010378m.g | RNA.regulation of transcription.C2C2(Zn) CO-like, Constans-like zinc finger family                     | CONSTANS-like 5                                | -0.21 | -1.53 | -0.24 | -1.26 | -0.10 | -0.91 | 0.02  | -0.95 | -0.38 | -1.00 |  |
| cassava4.1_011192m.g | RNA.regulation of transcription.C2C2(Zn) CO-like, Constans-like zinc finger family                     | CONSTANS-like 4                                | 0.00  | -0.88 | -0.25 | -0.84 | 0.11  | -0.34 | -0.01 | -0.51 | -0.39 | -0.99 |  |
| cassava4.1_013873m.g | RNA.regulation of transcription.C2C2(Zn) CO-like, Constans-like zinc finger family                     | B-box type zinc finger family protein          | -0.52 | -2.47 | -0.20 | -1.85 | 0.02  | -1.30 | -0.45 | -1.45 | -0.94 | -2.55 |  |

|                      |                                                                                                        |                                                               |       |       |       |       |       |       |       |       |       |       |
|----------------------|--------------------------------------------------------------------------------------------------------|---------------------------------------------------------------|-------|-------|-------|-------|-------|-------|-------|-------|-------|-------|
| cassava4.1_011725m.g | RNA.regulation of transcription.C2C2(Zn) CO-like, Constans-like zinc finger family                     | CONSTANS-like 4                                               | 0.10  | -1.16 | -0.20 | -1.16 | 0.10  | -0.78 | 0.07  | -0.98 | -0.49 | -1.40 |
| cassava4.1_010032m.g | RNA.regulation of transcription.C3H zinc finger family                                                 | CCCH-type zinc finger family protein                          | -0.37 | -2.42 | -0.01 | -2.45 | 0.04  | -1.45 | 0.21  | -1.88 | -0.61 | -2.66 |
| cassava4.1_014900m.g | RNA.regulation of transcription.Aux/IAA family                                                         | indole-3-acetic acid 7                                        | -0.91 | -2.87 | -1.64 | -2.60 | -0.59 | -2.93 | -0.96 | -2.40 | -1.16 | -2.32 |
| cassava4.1_034451m.g | RNA.regulation of transcription.C2H2 zinc finger family                                                | zinc finger (C2H2 type) family protein                        | -0.93 | -2.03 | -1.16 | -2.23 | -0.25 | -1.95 | -1.12 | -1.65 | -1.03 | -2.04 |
| cassava4.1_013130m.g | RNA.regulation of transcription.C2C2(Zn) GATA transcription factor family                              | ZIM-like 1                                                    | -0.45 | -1.74 | -0.50 | -1.19 | 0.00  | -1.20 | 0.11  | -1.70 | -0.42 | -1.75 |
| cassava4.1_016451m.g | RNA.regulation of transcription.C2C2(Zn) YABBY family                                                  | Plant-specific transcription factor YABBY family protein      | -0.63 | -1.73 | -0.57 | -1.48 | -0.09 | -1.03 | 0.09  | -1.53 | -0.65 | -2.16 |
| cassava4.1_031586m.g | RNA.regulation of transcription.C2H2 zinc finger family                                                | C2H2-type zinc finger family protein                          | -0.48 | -2.11 | -1.14 | -1.60 | -0.25 | -1.75 | -0.10 | -1.51 | -0.88 | -2.12 |
| cassava4.1_015577m.g | RNA.regulation of transcription.Aux/IAA family                                                         | indole-3-acetic acid inducible 14                             | -0.85 | -2.00 | -0.53 | -1.85 | -0.15 | -2.10 | -0.18 | -1.97 | -0.77 | -2.63 |
| cassava4.1_027196m.g | RNA.regulation of transcription.MYB domain transcription factor family                                 | myb domain protein 60                                         | -0.92 | -2.02 | -0.75 | -1.44 | -0.13 | -1.80 | -0.43 | -1.31 | -0.53 | -2.21 |
| cassava4.1_013503m.g | RNA.regulation of transcription.MYB-related transcription factor family                                | Duplicated homeodomain-like superfamily protein               | -0.19 | -0.71 | -0.33 | -0.85 | -0.06 | -1.06 | 0.08  | -0.60 | -0.29 | -0.97 |
| cassava4.1_013487m.g | RNA.regulation of transcription.bHLH,Basic Helix-Loop-Helix family                                     | basic helix-loop-helix (bHLH) DNA-binding superfamily protein | -0.94 | -1.24 | -0.23 | -1.14 | -0.04 | -0.88 | -0.33 | -0.95 | -0.10 | -0.95 |
| cassava4.1_007846m.g | RNA.regulation of transcription.MYB domain transcription factor family                                 | myb domain protein 61                                         | -1.82 | -2.61 | -0.91 | -3.13 | -0.08 | -2.22 | -1.43 | -2.74 | -0.71 | -2.38 |
| cassava4.1_005852m.g | RNA.regulation of transcription.AP2/EREBP, APETALA2/Ethylene-responsive element binding protein family | Integrase-type DNA-binding superfamily protein                | -0.92 | -1.59 | -0.55 | -1.11 | 0.10  | -1.60 | -0.22 | -2.35 | 0.06  | -1.20 |
| cassava4.1_010095m.g | RNA.regulation of transcription.Aux/IAA family                                                         | indole-3-acetic acid inducible 9                              | -1.00 | -1.45 | -0.74 | -1.34 | -0.21 | -1.75 | -0.47 | -1.66 | -0.36 | -0.98 |
| cassava4.1_034383m.g | RNA.regulation of transcription.Bromodomain proteins                                                   | DNA-binding bromodomain-containing protein                    | -0.76 | -2.23 | -0.22 | -2.33 | -0.72 | -3.36 | 0.56  | -3.12 | -0.25 | -2.62 |
| cassava4.1_028769m.g | RNA.regulation of transcription.FHA transcription factor                                               | Forkhead-associated (FHA) domain-containing protein           | -0.47 | -1.16 | -0.33 | -1.36 | -0.21 | -1.33 | 0.00  | -1.59 | -0.22 | -0.95 |
| cassava4.1_002408m.g | RNA.regulation of transcription.ARF, Auxin Response Factor family                                      | auxin response factor 9                                       | -0.38 | -1.17 | -0.36 | -1.14 | -0.19 | -0.91 | -0.01 | -1.53 | 0.17  | -0.80 |
| cassava4.1_001928m.g | RNA.regulation of transcription.HB,Homeobox transcription factor family                                | homeobox-7                                                    | -0.39 | -1.21 | -0.18 | -1.13 | -0.20 | -0.99 | -0.05 | -1.33 | 0.01  | -0.77 |
| cassava4.1_027046m.g | RNA.regulation of transcription.bHLH,Basic Helix-Loop-Helix family                                     | basic helix-loop-helix (bHLH) DNA-binding superfamily protein | -1.47 | -4.61 | -0.78 | -2.63 | -0.04 | -3.48 | -0.24 | -4.02 | -0.10 | -2.56 |

|                      |                                                                           |                                                               |       |       |       |       |       |       |       |       |       |       |
|----------------------|---------------------------------------------------------------------------|---------------------------------------------------------------|-------|-------|-------|-------|-------|-------|-------|-------|-------|-------|
| cassava4.1_025106m.g | RNA.regulation of transcription.C3H zinc finger family                    | zinc knuckle (CCHC-type) family protein                       | -0.91 | -3.15 | -0.35 | -2.06 | -0.16 | -2.83 | -0.59 | -2.43 | -0.40 | -1.82 |
| cassava4.1_028677m.g | RNA.regulation of transcription.GRAS transcription factor family          | GRAS family transcription factor family protein               | -0.92 | -4.06 | -0.68 | -2.72 | -0.14 | -3.84 | 0.17  | -3.18 | -0.26 | -2.63 |
| cassava4.1_025707m.g | RNA.regulation of transcription.MADS box transcription factor family      | AGAMOUS-like 42                                               | -1.20 | -3.68 | -0.26 | -2.54 | -0.35 | -3.68 | -0.01 | -2.70 | -0.33 | -2.92 |
| cassava4.1_031585m.g | RNA.regulation of transcription.C2C2(Zn) GATA transcription factor family | cytokinin-responsive gata factor 1                            | -1.15 | -5.84 | -0.60 | -4.98 | -0.05 | -5.30 | -0.80 | -4.06 | -0.70 | -4.53 |
| cassava4.1_007384m.g | RNA.regulation of transcription.G2-like transcription factor family, GARP | GBF's pro-rich region-interacting factor 1                    | -0.26 | -2.08 | -0.20 | -1.61 | 0.03  | -1.65 | 0.03  | -1.60 | -0.30 | -1.27 |
| cassava4.1_020375m.g | RNA.regulation of transcription.MYB-related transcription factor family   | RAD-like 1                                                    | -1.79 | -6.20 | -1.81 | -5.94 | -0.28 | -6.22 | -0.16 | -5.13 | -0.27 | -4.93 |
| cassava4.1_000118m.g | RNA.regulation of transcription.HB,Homeobox transcription factor family   | homeobox-1                                                    | -0.72 | -2.63 | -0.45 | -2.33 | -0.11 | -2.89 | -0.33 | -2.62 | -0.63 | -2.43 |
| cassava4.1_007418m.g | RNA.regulation of transcription.bHLH,Basic Helix-Loop-Helix family        | basic helix-loop-helix (bHLH) DNA-binding superfamily protein | -0.89 | -2.52 | -0.66 | -2.38 | -0.10 | -2.56 | -0.15 | -3.00 | -0.46 | -2.65 |
| cassava4.1_022856m.g | RNA.regulation of transcription.MYB domain transcription factor family    | myb-like HTH transcriptional regulator family protein         | -1.15 | -5.04 | 0.01  | -3.57 | 0.06  | -4.15 | 0.11  | -4.96 | -0.52 | -4.66 |
| cassava4.1_012587m.g | RNA.regulation of transcription.C2C2(Zn) GATA transcription factor family | cytokinin-responsive gata factor 1                            | -0.59 | -2.05 | -0.26 | -1.70 | 0.02  | -1.43 | -0.37 | -1.74 | -0.40 | -1.55 |
| cassava4.1_012217m.g | RNA.regulation of transcription.MYB-related transcription factor family   | Homeodomain-like superfamily protein                          | -0.64 | -2.31 | -0.32 | -2.14 | -0.03 | -1.85 | -0.18 | -2.51 | -0.43 | -1.91 |
| cassava4.1_001979m.g | RNA.regulation of transcription.ARF, Auxin Response Factor family         | auxin response factor 4                                       | -0.98 | -1.81 | -0.77 | -1.86 | -0.20 | -1.37 | -0.91 | -1.85 | -0.79 | -1.87 |
| cassava4.1_012613m.g | RNA.regulation of transcription.bHLH,Basic Helix-Loop-Helix family        | basic helix-loop-helix (bHLH) DNA-binding superfamily protein | -1.02 | -3.46 | -0.75 | -3.24 | 0.31  | -1.78 | -0.92 | -3.73 | -1.12 | -3.56 |
| cassava4.1_017143m.g | RNA.regulation of transcription.C2C2(Zn) YABBY family                     | plant-specific transcription factor YABBY family protein      | -0.99 | -1.71 | -0.67 | -1.18 | -0.06 | -1.08 | -0.56 | -1.73 | -0.60 | -1.41 |
| cassava4.1_004019m.g | RNA.regulation of transcription.B3 transcription factor family            | AP2/B3-like transcriptional factor family protein             | -0.38 | -0.96 | 0.04  | -0.43 | 0.16  | -0.44 | 0.30  | -0.64 | -0.01 | -0.79 |
| cassava4.1_017177m.g | RNA.regulation of transcription.C2C2(Zn) YABBY family                     | plant-specific transcription factor YABBY family protein      | -0.80 | -1.78 | -0.29 | -1.04 | -0.20 | -1.03 | -0.27 | -1.42 | -0.41 | -1.65 |

|                      |                                                                                    |                                                                           |       |       |       |       |       |       |       |       |       |       |
|----------------------|------------------------------------------------------------------------------------|---------------------------------------------------------------------------|-------|-------|-------|-------|-------|-------|-------|-------|-------|-------|
| cassava4.1_010237m.g | RNA.regulation of transcription.C2H2 zinc finger family                            | C2H2-like zinc finger protein                                             | -1.30 | -3.05 | -0.87 | -1.92 | 0.19  | -1.85 | -0.03 | -2.16 | -0.54 | -2.53 |
| cassava4.1_011476m.g | RNA.regulation of transcription.MYB-related transcription factor family            | Homeodomain-like superfamily protein                                      | -0.59 | -2.06 | -0.32 | -0.89 | -0.11 | -1.24 | -0.18 | -1.77 | -0.35 | -1.65 |
| cassava4.1_007456m.g | RNA.regulation of transcription.bZIP transcription factor family                   | bZIP transcription factor family protein                                  | -1.61 | -2.68 | -0.62 | -2.51 | 0.05  | -1.60 | 0.25  | -3.64 | 0.06  | -2.80 |
| cassava4.1_017602m.g | RNA.regulation of transcription.C2C2(Zn) CO-like, Constans-like zinc finger family | B-box type zinc finger family protein                                     | -0.64 | -2.79 | -0.65 | -1.82 | -0.12 | -1.15 | 0.04  | -2.09 | -0.41 | -1.69 |
| cassava4.1_031269m.g | RNA.regulation of transcription.C2H2 zinc finger family                            | C2H2-type zinc finger family protein                                      | -1.81 | -6.11 | -1.50 | -3.90 | -0.51 | -3.28 | -0.63 | -4.55 | -0.70 | -4.55 |
| cassava4.1_020357m.g | RNA.regulation of transcription.MYB-related transcription factor family            | RAD-like 6                                                                | -1.70 | -3.91 | -1.17 | -2.80 | -0.11 | -2.10 | -0.03 | -2.91 | -0.51 | -2.43 |
| cassava4.1_027289m.g | RNA.regulation of transcription.NIN-like bZIP-related family                       | Plant regulator RWP-RK family protein                                     | -0.84 | -2.07 | -0.56 | -1.66 | -0.10 | -1.49 | 0.17  | -2.09 | -0.11 | -1.56 |
| cassava4.1_030452m.g | RNA.regulation of transcription.C2C2(Zn) DOF zinc finger family                    | cycling DOF factor 2                                                      | -1.54 | -3.97 | -1.72 | -2.83 | -0.41 | -4.02 | -1.36 | -5.65 | -0.77 | -4.45 |
| cassava4.1_006216m.g | RNA.regulation of transcription.MYB-related transcription factor family            | Homeodomain-like superfamily protein                                      | -1.05 | -2.42 | -1.03 | -2.27 | -0.51 | -2.89 | -0.23 | -3.55 | -0.46 | -2.82 |
| cassava4.1_002980m.g | RNA.regulation of transcription.ARF, Auxin Response Factor family                  | auxin response factor 16                                                  | -1.15 | -2.31 | -0.70 | -1.62 | 0.20  | -2.20 | -0.46 | -3.21 | -0.74 | -3.09 |
| cassava4.1_034399m.g | RNA.regulation of transcription.bHLH,Basic Helix-Loop-Helix family                 | basic helix-loop-helix (bHLH) DNA-binding superfamily protein             | -0.24 | -1.87 | -0.12 | -1.67 | 0.03  | -2.02 | -0.20 | -2.56 | -0.57 | -2.72 |
| cassava4.1_009094m.g | RNA.regulation of transcription.TCP transcription factor family                    | TEOSINTE BRANCHED, cycloidea and PCF (TCP) 14                             | -0.65 | -2.69 | -0.77 | -2.23 | 0.03  | -2.21 | -0.77 | -3.23 | -0.58 | -3.32 |
| cassava4.1_014849m.g | RNA.regulation of transcription.Aux/IAA family                                     | indoleacetic acid-induced protein 16                                      | -0.66 | -1.99 | -0.46 | -1.76 | -0.13 | -1.65 | -0.79 | -2.01 | -0.72 | -3.23 |
| cassava4.1_007172m.g | RNA.regulation of transcription.C2C2(Zn) DOF zinc finger family                    | cycling DOF factor 3                                                      | -0.46 | -3.27 | -1.12 | -3.09 | -0.11 | -2.50 | -0.66 | -3.22 | -0.54 | -4.11 |
| cassava4.1_031883m.g | RNA.regulation of transcription.Nucleosome/chromatin assembly factor group         | HMG (high mobility group) box protein with ARID/BRIGHT DNA-binding domain | -1.58 | -5.82 | -2.26 | -6.28 | -0.86 | -4.21 | -0.87 | -5.83 | -0.98 | -8.71 |
| cassava4.1_034343m.g | RNA.regulation of transcription.CCAAT box binding factor family, HAP5              | nuclear factor Y, subunit C4                                              | -0.26 | -1.94 | -0.12 | -2.18 | -0.25 | -1.36 | -0.19 | -3.18 | -0.68 | -3.80 |
| cassava4.1_033968m.g | RNA.regulation of transcription.GRAS transcription factor family                   | GRAS family transcription factor family protein                           | -0.28 | -1.23 | -0.29 | -1.09 | -0.13 | -0.86 | -0.25 | -1.57 | -0.56 | -1.68 |
| cassava4.1_024318m.g | RNA.regulation of transcription.TCP transcription factor family                    | TEOSINTE BRANCHED, cycloidea and PCF (TCP) 14                             | -0.38 | -1.41 | -0.52 | -1.95 | -0.02 | -1.40 | -0.77 | -2.26 | -0.86 | -2.27 |

|                      |                                                                                                           |                                                                    |       |       |       |       |       |       |       |       |       |       |
|----------------------|-----------------------------------------------------------------------------------------------------------|--------------------------------------------------------------------|-------|-------|-------|-------|-------|-------|-------|-------|-------|-------|
| cassava4.1_014022m.g | RNA.regulation of transcription.bZIP transcription factor family                                          | Basic-leucine zipper (bZIP)<br>transcription factor family protein | -0.43 | -1.36 | 0.05  | -0.54 | -0.08 | -0.15 | -0.36 | -1.20 | -0.54 | -1.14 |
| cassava4.1_012706m.g | RNA.regulation of transcription.Aux/IAA family                                                            | indole-3-acetic acid inducible 11                                  | -0.38 | -1.58 | -0.23 | -0.83 | -0.27 | -0.57 | -0.12 | -1.23 | -0.75 | -1.39 |
| cassava4.1_006027m.g | RNA.regulation of transcription.bHLH,Basic Helix-Loop-Helix family                                        | basic helix-loop-helix (bHLH)<br>DNA-binding superfamily protein   | -0.39 | -1.15 | -0.22 | -0.85 | -0.11 | -0.30 | -0.13 | -1.01 | -0.45 | -1.06 |
| cassava4.1_012686m.g | RNA.regulation of transcription.C2C2(Zn) YABBY family                                                     | Plant-specific transcription factor<br>YABBY family protein        | -1.23 | -2.60 | -0.65 | -1.82 | -0.31 | -1.37 | -0.51 | -2.54 | -0.99 | -2.46 |
| cassava4.1_013899m.g | RNA.regulation of transcription.bHLH,Basic Helix-Loop-Helix family                                        | basic helix-loop-helix (bHLH)<br>DNA-binding superfamily protein   | -0.98 | -1.66 | -0.34 | -0.61 | -0.21 | -0.39 | -0.01 | -1.80 | -0.26 | -1.12 |
| cassava4.1_014204m.g | RNA.regulation of transcription.C2C2(Zn) GATA transcription factor family                                 | GATA transcription factor 1                                        | -0.60 | -1.19 | -0.27 | -0.58 | 0.08  | -0.34 | -0.24 | -1.15 | -0.37 | -0.86 |
| cassava4.1_007232m.g | RNA.regulation of transcription.Chromatin Remodeling Factors                                              | switch subunit 3                                                   | -0.86 | -1.43 | -0.02 | -0.70 | 0.06  | -0.08 | -0.30 | -1.28 | -0.21 | -1.02 |
| cassava4.1_008380m.g | RNA.regulation of transcription.bHLH,Basic Helix-Loop-Helix family                                        | basic helix-loop-helix (bHLH)<br>DNA-binding superfamily protein   | -0.69 | -2.29 | -0.13 | -1.41 | -0.31 | -0.87 | -0.01 | -2.53 | -0.09 | -1.45 |
| cassava4.1_015296m.g | RNA.regulation of transcription.AP2/EREBP,<br>APETALA2/Ethylene-responsive element binding protein family | Integrase-type DNA-binding<br>superfamily protein                  | -0.31 | -1.26 | 0.24  | -0.64 | 0.03  | -0.26 | 0.06  | -1.63 | -0.16 | -1.16 |
| cassava4.1_012965m.g | RNA.regulation of transcription.C2C2(Zn) CO-like, Constans-like zinc finger family                        | B-box type zinc finger family protein                              | -0.50 | -2.76 | -0.30 | -1.82 | -0.51 | -0.83 | -0.31 | -2.85 | -0.51 | -2.77 |
| cassava4.1_009861m.g | RNA.regulation of transcription.bHLH,Basic Helix-Loop-Helix family                                        | basic helix-loop-helix (bHLH)<br>DNA-binding superfamily protein   | -0.89 | -2.88 | -0.79 | -1.80 | 0.12  | -0.28 | -0.36 | -3.19 | -0.63 | -2.03 |
| cassava4.1_009139m.g | RNA.regulation of transcription.E2F/DP transcription factor family                                        | DP-E2F-like 1                                                      | -0.63 | -1.37 | -0.35 | -1.03 | -0.01 | -0.54 | -0.40 | -1.66 | -0.35 | -1.06 |
| cassava4.1_026662m.g | RNA.regulation of transcription.G2-like transcription factor family, GARP                                 | GBF's pro-rich region-interacting<br>factor 1                      | -0.71 | -2.74 | -0.71 | -1.71 | -0.16 | -0.85 | -0.60 | -2.44 | -0.40 | -1.44 |
| cassava4.1_015138m.g | RNA.regulation of transcription.bHLH,Basic Helix-Loop-Helix family                                        | basic helix-loop-helix (bHLH)<br>DNA-binding superfamily protein   | -0.76 | -2.37 | -0.34 | -0.82 | -0.11 | -0.81 | -0.83 | -1.73 | -0.39 | -1.14 |
| cassava4.1_007940m.g | RNA.regulation of transcription.C2C2(Zn) CO-like, Constans-like zinc finger family                        | B-box type zinc finger protein with<br>CCT domain                  | -1.63 | -5.53 | -0.87 | -2.94 | 0.09  | -2.17 | -0.86 | -3.55 | -0.57 | -2.89 |
| cassava4.1_010137m.g | RNA.regulation of transcription.C2C2(Zn) CO-like, Constans-like zinc                                      | CONSTANS-like 5                                                    | -1.03 | -2.99 | -0.76 | -1.75 | -0.13 | -1.49 | -0.68 | -1.98 | -0.48 | -1.75 |

|                      |                                                                                                           |                                                                                              |       |       |       |       |       |       |       |       |       |       |  |
|----------------------|-----------------------------------------------------------------------------------------------------------|----------------------------------------------------------------------------------------------|-------|-------|-------|-------|-------|-------|-------|-------|-------|-------|--|
|                      |                                                                                                           | finger family                                                                                |       |       |       |       |       |       |       |       |       |       |  |
| cassava4.1_016105m.g | RNA.regulation of transcription.C2C2(Zn) YABBY family                                                     | Plant-specific transcription factor<br>YABBY family protein                                  | -1.73 | -4.33 | -0.86 | -2.72 | -0.31 | -1.84 | -0.71 | -2.88 | -0.77 | -2.61 |  |
| cassava4.1_016118m.g | RNA.regulation of transcription.C2C2(Zn) YABBY family                                                     | Plant-specific transcription factor<br>YABBY family protein                                  | -1.43 | -4.13 | -0.54 | -2.02 | -0.04 | -1.52 | -0.93 | -2.58 | -0.78 | -2.06 |  |
| cassava4.1_007858m.g | RNA.regulation of transcription.bHLH,Basic Helix-Loop-Helix family                                        | cryptochrome-interacting<br>basic-helix-loop-helix 1                                         | -1.35 | -3.98 | -0.19 | -1.80 | -0.63 | -1.15 | -0.84 | -2.62 | -0.64 | -2.58 |  |
| cassava4.1_007389m.g | RNA.regulation of transcription.HB,Homeobox transcription factor family                                   | homeobox from Arabidopsis thaliana                                                           | -0.83 | -3.35 | 0.36  | -0.35 | 0.29  | -0.57 | 0.12  | -2.08 | -0.16 | -1.88 |  |
| cassava4.1_005961m.g | RNA.regulation of transcription.AP2/EREBP,<br>APETALA2/Ethylene-responsive element binding protein family | Integrase-type DNA-binding<br>superfamily protein                                            | -1.00 | -2.11 | -0.45 | -1.64 | -0.04 | -1.18 | -1.12 | -2.57 | -1.07 | -1.85 |  |
| cassava4.1_016924m.g | RNA.regulation of transcription.AP2/EREBP,<br>APETALA2/Ethylene-responsive element binding protein family | DREB and EAR motif protein 2                                                                 | -0.63 | -1.15 | -0.26 | -0.80 | 0.37  | -0.38 | -0.48 | -1.32 | -0.58 | -1.02 |  |
| cassava4.1_006460m.g | RNA.regulation of transcription.SET-domain transcriptional regulator<br>family                            | Arabinanase/levansucrase/invertase                                                           | -1.19 | -2.08 | -0.30 | -0.95 | 0.04  | -1.20 | -1.04 | -2.27 | -0.57 | -1.66 |  |
| cassava4.1_016111m.g | RNA.regulation of transcription.C2C2(Zn) CO-like, Constans-like zinc<br>finger family                     | B-box type zinc finger family protein                                                        | -0.47 | -1.95 | -0.58 | -0.82 | -0.08 | -1.43 | -0.65 | -2.04 | -0.32 | -1.25 |  |
| cassava4.1_006618m.g | RNA.regulation of transcription.TCP transcription factor family                                           | TEOSINTE BRANCHED 1, cycloidea<br>and PCF transcription factor 2                             | -0.29 | -0.85 | -0.34 | -0.36 | 0.10  | -0.45 | -0.37 | -1.25 | -0.08 | -0.51 |  |
| cassava4.1_034131m.g | RNA.regulation of transcription.GRAS transcription factor family                                          | GRAS family transcription factor                                                             | -1.37 | -2.71 | -1.33 | -2.11 | 0.16  | -0.14 | -0.72 | -2.30 | -0.33 | -1.66 |  |
| cassava4.1_001764m.g | RNA.regulation of transcription.HB,Homeobox transcription factor family                                   | Homeobox-leucine zipper family<br>protein / lipid-binding START<br>domain-containing protein | -0.34 | -1.01 | -0.52 | -1.12 | 0.03  | -0.10 | -0.05 | -1.12 | 0.11  | -0.52 |  |
| cassava4.1_004978m.g | RNA.regulation of transcription.CPP(Zn),CPP1-related transcription factor<br>family                       | Tesmin/TSO1-like CXC<br>domain-containing protein                                            | -0.52 | -1.16 | -0.25 | -0.53 | 0.08  | -0.37 | 0.48  | -0.99 | -0.05 | -0.53 |  |
| cassava4.1_015543m.g | RNA.regulation of transcription.MADS box transcription factor family                                      | K-box region and MADS-box<br>transcription factor family protein                             | -0.55 | -0.87 | -0.48 | -0.59 | -0.23 | -0.35 | -0.03 | -1.05 | -0.14 | -0.52 |  |
| cassava4.1_032318m.g | RNA.regulation of transcription.MYB-related transcription factor family                                   | Homeodomain-like superfamily<br>protein                                                      | -0.44 | -0.96 | -0.85 | -0.74 | -0.22 | 0.21  | -0.16 | -1.12 | 0.01  | -1.16 |  |

|    |                      |                                                                                                        |                                                                                             |       |       |       |       |       |       |       |       |       |       |
|----|----------------------|--------------------------------------------------------------------------------------------------------|---------------------------------------------------------------------------------------------|-------|-------|-------|-------|-------|-------|-------|-------|-------|-------|
|    | cassava4.1_011576m.g | RNA.regulation of transcription.CCAAT box binding factor family, HAP2                                  | nuclear factor Y, subunit A3                                                                | -0.69 | -0.87 | -1.14 | -1.94 | -0.05 | -0.48 | 0.11  | -1.40 | -0.58 | -1.51 |
|    | cassava4.1_011567m.g | RNA.regulation of transcription.HB,Homeobox transcription factor family                                | homeobox 1                                                                                  | -0.42 | -1.25 | -0.96 | -2.26 | 0.19  | -0.39 | 0.26  | -1.95 | -0.81 | -2.88 |
|    | cassava4.1_032429m.g | RNA.regulation of transcription.bHLH,Basic Helix-Loop-Helix family                                     | basic helix-loop-helix (bHLH)<br>DNA-binding superfamily protein                            | -0.43 | -0.63 | -0.20 | -1.12 | -0.06 | -0.21 | 0.27  | -1.11 | -0.15 | -1.09 |
|    | cassava4.1_024743m.g | RNA.regulation of transcription.TCP transcription factor family                                        | TCP family transcription factor                                                             | -0.89 | -3.11 | -1.14 | -3.48 | -0.05 | -0.28 | -0.18 | -3.83 | -0.85 | -3.63 |
|    | cassava4.1_006715m.g | RNA.regulation of transcription.GRAS transcription factor family                                       | scarecrow-like 3                                                                            | -0.20 | -0.74 | -0.41 | -1.16 | 0.02  | -0.01 | 0.47  | -0.71 | 0.19  | -0.61 |
|    | cassava4.1_013408m.g | RNA.regulation of transcription.Trihelix, Triple-Helix transcription factor family                     | sequence-specific DNA binding transcription factors                                         | -0.03 | -0.69 | -0.47 | -0.94 | 0.11  | -0.21 | 0.22  | -0.43 | -0.16 | -0.64 |
| C4 | cassava4.1_007151m.g | RNA.regulation of transcription.AP2/EREBP, APETALA2/Ethylene-responsive element binding protein family | Integrase-type DNA-binding superfamily protein                                              | 1.10  | 0.22  | 0.63  | 1.01  | -0.13 | 0.49  | -0.05 | -0.45 | 0.16  | 0.09  |
|    | cassava4.1_004047m.g | RNA.regulation of transcription.bZIP transcription factor family                                       | Basic-leucine zipper (bZIP) transcription factor family protein                             | 0.10  | 0.15  | 1.01  | 1.32  | 0.23  | 0.37  | -0.47 | -0.25 | 0.41  | 0.27  |
|    | cassava4.1_000920m.g | RNA.regulation of transcription.Argonaute                                                              | Argonaute family protein                                                                    | 0.43  | 0.67  | 0.68  | 1.48  | 0.29  | 0.71  | 0.19  | 0.46  | 0.32  | 0.50  |
|    | cassava4.1_000998m.g | RNA.regulation of transcription.JUMONJI family                                                         | transferases, transferring glycosyl groups                                                  | 0.19  | -0.11 | 0.59  | 1.73  | 0.01  | 0.38  | 0.23  | -0.41 | 0.10  | 0.12  |
|    | cassava4.1_001443m.g | RNA.regulation of transcription.JUMONJI family                                                         | Transcription factor jumonji (jnj) family protein / zinc finger (C5HC2 type) family protein | -0.50 | -0.55 | 0.08  | 0.94  | -0.05 | -0.14 | -0.83 | -2.01 | -0.21 | -1.18 |
|    | cassava4.1_015610m.g | RNA.regulation of transcription.MYB domain transcription factor family                                 | myb domain protein 4                                                                        | 0.00  | 0.91  | -0.08 | 1.48  | 0.23  | 1.17  | -0.42 | -0.64 | 0.32  | -0.30 |
|    | cassava4.1_021785m.g | RNA.regulation of transcription.AP2/EREBP, APETALA2/Ethylene-responsive element binding protein family | ARIA-interacting double AP2 domain protein                                                  | 0.26  | 1.35  | 0.00  | 0.78  | -0.08 | 0.20  | 0.08  | -0.47 | 0.23  | -0.14 |
|    | cassava4.1_001357m.g | RNA.regulation of transcription.ARF, Auxin Response Factor family                                      | auxin response factor 6                                                                     | 0.20  | 1.02  | -0.09 | -0.12 | -0.19 | -0.57 | -0.42 | -0.64 | -0.13 | -0.78 |
|    | cassava4.1_032607m.g | RNA.regulation of transcription.bZIP transcription factor family                                       | bZIP transcription factor family protein                                                    | 0.33  | 1.23  | -0.16 | -0.02 | 0.25  | -0.78 | -0.60 | -1.45 | -0.23 | -0.88 |
|    | cassava4.1_012438m.g | RNA.regulation of transcription.AP2/EREBP, APETALA2/Ethylene-responsive element binding protein family | Integrase-type DNA-binding superfamily protein                                              | 0.87  | 1.83  | 0.12  | 0.06  | 0.08  | 0.36  | -1.88 | -1.92 | -0.52 | -1.42 |
|    | cassava4.1_009136m.g | RNA.regulation of transcription.C2C2(Zn) GATA transcription factor family                              | GATA transcription factor 26                                                                | 0.27  | 0.49  | 0.10  | 0.11  | -0.17 | -0.18 | -0.18 | -0.95 | -0.27 | -0.53 |
|    | cassava4.1_012777m.g | RNA.regulation of transcription.HB,Homeobox transcription factor family                                | homeobox 1                                                                                  | 0.71  | 0.85  | -0.17 | 0.15  | 0.06  | 0.22  | -0.11 | -0.65 | -0.13 | -0.45 |

|                      |                                                                                                        |                                                               |       |       |       |       |       |       |       |       |       |       |
|----------------------|--------------------------------------------------------------------------------------------------------|---------------------------------------------------------------|-------|-------|-------|-------|-------|-------|-------|-------|-------|-------|
| cassava4.1_010485m.g | RNA.regulation of transcription.G2-like transcription factor family, GARP                              | Homeodomain-like superfamily protein                          | 0.57  | 1.24  | 0.43  | 0.69  | 0.21  | 1.14  | 0.06  | -0.42 | -0.19 | -0.65 |
| cassava4.1_015664m.g | RNA.regulation of transcription.SNF7                                                                   | SNF7 family protein                                           | 0.74  | 1.04  | 0.43  | 0.97  | 0.52  | 0.65  | 0.13  | 0.46  | -0.04 | 0.01  |
| cassava4.1_002672m.g | RNA.regulation of transcription.C3H zinc finger family                                                 | zinc finger (CCCH-type) family protein                        | 1.27  | 0.89  | 0.58  | 0.65  | 0.27  | 0.81  | 0.44  | 1.07  | -0.34 | -0.46 |
| cassava4.1_002724m.g | RNA.regulation of transcription.C3H zinc finger family                                                 | zinc finger (CCCH-type) family protein                        | 0.98  | 0.73  | 0.62  | 0.73  | 0.28  | 0.85  | 0.16  | 0.81  | -0.19 | -0.12 |
| cassava4.1_016728m.g | RNA.regulation of transcription.Aux/IAA family                                                         | indoleacetic acid-induced protein 16                          | 0.70  | 0.33  | 0.73  | 1.00  | 0.43  | 1.41  | 0.27  | 0.44  | -0.43 | -0.37 |
| cassava4.1_012634m.g | RNA.regulation of transcription.HB,Homeobox transcription factor family                                | homeobox protein 6                                            | 1.26  | 1.10  | 0.64  | 1.20  | 0.25  | 2.19  | 0.78  | 1.53  | -0.19 | 0.51  |
| cassava4.1_013436m.g | RNA.regulation of transcription.C2C2(Zn) GATA transcription factor family                              | GATA-type zinc finger protein with TIFY domain                | -0.14 | -0.60 | -0.23 | -0.26 | 0.06  | 0.39  | -0.73 | -0.79 | -0.50 | -1.51 |
| cassava4.1_032088m.g | RNA.regulation of transcription.TCP transcription factor family                                        | TCP family transcription factor                               | 0.06  | -0.32 | -0.45 | -0.11 | -0.04 | 1.66  | 0.12  | -0.70 | -0.58 | -1.39 |
| cassava4.1_027174m.g | RNA.regulation of transcription.bHLH,Basic Helix-Loop-Helix family                                     | basic helix-loop-helix (bHLH) DNA-binding superfamily protein | -1.54 | -1.72 | -0.27 | -0.27 | -1.59 | -0.82 | -1.38 | -2.53 | -0.13 | -0.39 |
| cassava4.1_009849m.g | RNA.regulation of transcription.bHLH,Basic Helix-Loop-Helix family                                     | basic helix-loop-helix (bHLH) DNA-binding superfamily protein | -0.55 | -1.03 | -0.34 | -0.16 | -0.09 | -0.20 | -0.10 | -1.36 | 0.13  | 0.12  |
| cassava4.1_025309m.g | RNA.regulation of transcription.MADS box transcription factor family                                   | AGAMOUS-like 30                                               | -1.49 | -1.66 | -0.52 | -0.30 | -0.33 | -1.25 | -0.74 | -2.71 | -0.45 | -0.90 |
| cassava4.1_009158m.g | RNA.regulation of transcription.bHLH,Basic Helix-Loop-Helix family                                     | basic helix-loop-helix (bHLH) DNA-binding superfamily protein | -0.87 | -0.74 | -0.11 | -0.16 | -0.17 | -0.14 | -0.93 | -2.68 | 0.33  | -0.22 |
| cassava4.1_002081m.g | RNA.regulation of transcription.Trihelix, Triple-Helix transcription factor family                     | GT-2-like 1                                                   | -0.12 | -0.10 | -0.06 | 0.25  | -0.03 | -0.11 | -0.11 | -1.47 | 0.21  | 0.07  |
| cassava4.1_010157m.g | RNA.regulation of transcription.AP2/EREBP, APETALA2/Ethylene-responsive element binding protein family | AP2/B3 transcription factor family protein                    | 0.79  | -1.70 | 1.67  | 1.62  | 0.38  | 1.59  | -0.26 | 0.59  | 1.53  | 1.00  |
| cassava4.1_004685m.g | RNA.regulation of transcription.bHLH,Basic Helix-Loop-Helix family                                     | basic helix-loop-helix (bHLH) DNA-binding superfamily protein | -0.64 | -1.64 | 1.11  | 1.41  | 0.26  | 0.59  | -0.47 | -0.65 | 0.39  | 0.47  |
| cassava4.1_002257m.g | RNA.regulation of transcription.CPP(Zn),CPP1-related transcription factor family                       | TESMIN/TSO1-like CXC 2                                        | -2.50 | -3.77 | 0.01  | -0.72 | -0.38 | -1.39 | -1.16 | -2.58 | -0.27 | -0.56 |
| cassava4.1_015402m.g | RNA.regulation of transcription.AP2/EREBP,                                                             | Integrase-type DNA-binding                                    | 0.84  | -2.58 | 2.35  | 2.59  | 0.38  | 0.89  | -1.13 | -0.25 | 2.08  | -1.29 |



|                      |  |                                                                                                        |                                                                         |       |       |       |       |       |       |       |       |       |       |
|----------------------|--|--------------------------------------------------------------------------------------------------------|-------------------------------------------------------------------------|-------|-------|-------|-------|-------|-------|-------|-------|-------|-------|
|                      |  | APETALA2/Ethylene-responsive element binding protein family                                            | superfamily protein                                                     |       |       |       |       |       |       |       |       |       |       |
| cassava4.1_003107m.g |  | RNA.regulation of transcription.C3H zinc finger family                                                 | zinc finger (CCCH-type) family protein                                  | 0.22  | -1.28 | 1.84  | 0.87  | 0.69  | -0.08 | -0.21 | 0.11  | 0.84  | -0.83 |
| cassava4.1_007562m.g |  | RNA.regulation of transcription.PHOR1                                                                  | ARM repeat superfamily protein                                          | -0.04 | -1.34 | 2.03  | 1.52  | 0.87  | 0.27  | 0.28  | -0.21 | 2.07  | -1.14 |
| cassava4.1_002125m.g |  | RNA.regulation of transcription.GRAS transcription factor family                                       | SCARECROW-like 14                                                       | 0.06  | -0.74 | 1.91  | 1.54  | 0.61  | 0.66  | -0.42 | -1.34 | 0.53  | -2.13 |
| cassava4.1_034207m.g |  | RNA.regulation of transcription.PHOR1                                                                  | CYS, MET, PRO, and GLY protein 2                                        | -0.51 | -1.40 | 0.79  | 0.45  | 0.21  | 0.01  | -0.97 | -1.06 | -0.57 | -1.56 |
| cassava4.1_005028m.g |  | RNA.regulation of transcription.GRAS transcription factor family                                       | SCARECROW-like 13                                                       | -0.05 | -0.99 | 0.49  | 0.02  | 0.26  | -0.29 | 0.06  | -0.56 | -0.22 | -0.63 |
| cassava4.1_011430m.g |  | RNA.regulation of transcription.C2C2(Zn) GATA transcription factor family                              | GATA transcription factor 5                                             | -0.12 | -1.46 | 1.43  | 0.30  | 0.38  | -0.60 | -0.33 | -1.35 | -0.18 | -1.81 |
| cassava4.1_002197m.g |  | RNA.regulation of transcription.GRAS transcription factor family                                       | SCARECROW-like 14                                                       | -0.09 | -0.81 | 0.64  | 0.29  | 0.19  | -0.19 | -0.24 | -0.59 | -0.03 | -1.19 |
| cassava4.1_003039m.g |  | RNA.regulation of transcription.C3H zinc finger family                                                 | zinc finger (CCCH-type) family protein                                  | -0.33 | -2.24 | 1.50  | 0.21  | 0.54  | -0.30 | -0.59 | -1.83 | 0.27  | -2.04 |
| cassava4.1_005031m.g |  | RNA.regulation of transcription.GRAS transcription factor family                                       | SCARECROW-like 13                                                       | -0.21 | -1.30 | 0.73  | 0.06  | 0.41  | -0.19 | -0.06 | -1.12 | -0.14 | -1.22 |
| cassava4.1_023451m.g |  | RNA.regulation of transcription.Trihelix, Triple-Helix transcription factor family                     | Alcohol dehydrogenase transcription factor Myb/SANT-like family protein | -0.27 | -1.17 | 0.58  | -0.31 | 0.30  | -0.04 | -0.73 | -0.90 | -0.14 | -0.70 |
| cassava4.1_028155m.g |  | RNA.regulation of transcription.GRAS transcription factor family                                       | GRAS family transcription factor                                        | -0.04 | -1.03 | -0.26 | -0.69 | -0.16 | -0.43 | -2.04 | -1.32 | -1.00 | -0.82 |
| cassava4.1_022726m.g |  | RNA.regulation of transcription.AP2/EREBP, APETALA2/Ethylene-responsive element binding protein family | Integrase-type DNA-binding superfamily protein                          | -0.31 | -0.50 | -0.62 | -0.66 | 0.58  | -0.08 | -1.30 | -1.45 | 0.01  | -0.42 |
| cassava4.1_015251m.g |  | RNA.regulation of transcription.C2H2 zinc finger family                                                | C2H2 and C2HC zinc fingers superfamily protein                          | -0.73 | -0.92 | -0.62 | -1.35 | -0.09 | -0.61 | -1.16 | -1.80 | -0.42 | -0.57 |
| cassava4.1_025356m.g |  | RNA.regulation of transcription.C2C2(Zn) GATA transcription factor family                              | Unknow                                                                  | -0.72 | -1.38 | -0.62 | -0.78 | 0.18  | 0.97  | -1.88 | -2.88 | 0.21  | -0.65 |
| cassava4.1_013285m.g |  | RNA.regulation of transcription.HB,Homeobox transcription factor family                                | Homeobox-leucine zipper protein family                                  | -0.59 | -1.07 | -0.61 | -1.19 | -0.28 | -0.27 | -1.37 | -1.26 | -0.39 | -0.74 |
| cassava4.1_027347m.g |  | RNA.regulation of transcription.TCP transcription factor family                                        | TEOSINTE BRANCHED, cycloidea and PCF (TCP) 14                           | -1.69 | -1.82 | -0.69 | -1.10 | 0.12  | -0.47 | -1.71 | -1.81 | -1.13 | -1.62 |
| cassava4.1_014770m.g |  | RNA.regulation of transcription.AS2,Lateral Organ Boundaries Gene Family                               | LOB domain-containing protein 37                                        | -1.12 | -1.94 | -0.62 | 0.33  | -0.19 | 1.33  | -0.96 | -2.03 | -0.72 | -0.60 |

|                      |                      |                                                                                    |                                                     |       |       |       |       |       |       |       |       |       |       |
|----------------------|----------------------|------------------------------------------------------------------------------------|-----------------------------------------------------|-------|-------|-------|-------|-------|-------|-------|-------|-------|-------|
|                      | cassava4.1_011546m.g | RNA.regulation of transcription.Trihelix, Triple-Helix transcription factor family | sequence-specific DNA binding transcription factors | -0.12 | -0.40 | -0.12 | 0.36  | 0.18  | 0.71  | -0.48 | -1.06 | -0.46 | -0.05 |
| Signalling.light     | cassava4.1_000531m.g | signalling.light                                                                   | phytochrome B                                       | 0.57  | 1.36  | 0.70  | 2.04  | 0.12  | 2.45  | -0.42 | 0.57  | 0.03  | 1.47  |
|                      | cassava4.1_000570m.g | signalling.light                                                                   | phytochrome C                                       | -0.16 | -0.13 | -0.25 | -0.36 | -0.03 | -0.32 | -0.01 | -0.90 | 0.02  | -0.34 |
|                      | cassava4.1_007276m.g | signalling.light                                                                   | photolyase/blue-light receptor 2                    | -0.02 | 0.66  | 0.91  | 2.56  | 0.06  | 3.38  | -0.62 | 1.67  | -0.02 | 2.32  |
|                      | cassava4.1_007222m.g | signalling.light                                                                   | photolyase/blue-light receptor 2                    | -0.58 | -1.23 | -0.37 | -0.17 | -0.22 | 0.62  | -0.36 | -0.48 | -0.24 | -0.15 |
|                      | cassava4.1_030861m.g | signalling.light                                                                   | phytochrome kinase substrate 1                      | -0.69 | -1.03 | -0.92 | -1.87 | 0.10  | -1.69 | -0.68 | -2.01 | -0.69 | -3.10 |
|                      | cassava4.1_003609m.g | signalling.light                                                                   | Phototropic-responsive NPH3 family protein          | -1.20 | -1.48 | -0.56 | -0.39 | 0.01  | -0.49 | -0.28 | -2.47 | 0.20  | -0.79 |
|                      | cassava4.1_003684m.g | signalling.light                                                                   | Phototropic-responsive NPH3 family protein          | -0.75 | -2.01 | -0.68 | -1.09 | 0.00  | -0.24 | -0.37 | -1.34 | -0.15 | -1.00 |
|                      | cassava4.1_032028m.g | signalling.light                                                                   | Phototropic-responsive NPH3 family protein          | -1.81 | -4.05 | -1.07 | -3.01 | -0.57 | -3.08 | -0.73 | -5.29 | -1.08 | -4.15 |
|                      | cassava4.1_004505m.g | signalling.light                                                                   | Phototropic-responsive NPH3 family protein          | -0.33 | -0.46 | -0.38 | -0.23 | -0.18 | -0.87 | 0.01  | -1.57 | -0.22 | -1.18 |
|                      | cassava4.1_016715m.g | signalling.light                                                                   | Chlorophyll A-B binding family protein              | -0.66 | -3.07 | 0.12  | -1.35 | -0.09 | -0.59 | 1.96  | 2.01  | 0.37  | 0.85  |
|                      | cassava4.1_003032m.g | signalling.light                                                                   | cryptochrome 1                                      | -0.47 | -1.14 | -0.44 | -0.88 | -0.09 | -0.78 | -0.07 | -1.03 | -0.42 | -1.40 |
|                      | cassava4.1_002935m.g | signalling.light                                                                   | cryptochrome 1                                      | -0.40 | -1.10 | -0.38 | -1.07 | -0.07 | -0.81 | -0.06 | -1.45 | -0.42 | -1.49 |
|                      | cassava4.1_023566m.g | signalling.light                                                                   | PAS/LOV protein B                                   | 0.16  | -0.26 | 0.25  | 0.01  | -0.18 | -0.47 | -0.44 | -1.18 | -0.29 | -0.93 |
|                      | cassava4.1_002824m.g | signalling.light                                                                   | FAR1-related sequence 10                            | -0.48 | -0.60 | -0.37 | -0.36 | 0.02  | -0.84 | -0.23 | -1.31 | -0.07 | -0.84 |
|                      | cassava4.1_027812m.g | signalling.light                                                                   | Phototropic-responsive NPH3 family protein          | -1.75 | -3.86 | -1.69 | -1.16 | -0.06 | -4.04 | -1.29 | -3.04 | -0.85 | -3.13 |
|                      | cassava4.1_008267m.g | signalling.light                                                                   | Phototropic-responsive NPH3 family protein          | -0.83 | -1.62 | -0.01 | -0.48 | 0.08  | -1.36 | -1.25 | 0.68  | -0.24 | 0.93  |
|                      | cassava4.1_004180m.g | signalling.light                                                                   | Phototropic-responsive NPH3 family protein          | -0.91 | 0.30  | -0.91 | -1.22 | -0.10 | -1.90 | -1.08 | -1.76 | -0.10 | -1.14 |
| cassava4.1_005641m.g | signalling.light     | Phototropic-responsive NPH3 family protein                                         | -0.91                                               | -1.08 | -0.35 | -0.88 | -0.12 | -0.98 | -0.92 | -1.34 | -0.53 | -1.24 |       |

|                      |                  |  |                                             |       |       |       |       |       |       |       |       |       |       |
|----------------------|------------------|--|---------------------------------------------|-------|-------|-------|-------|-------|-------|-------|-------|-------|-------|
|                      |                  |  | protein                                     |       |       |       |       |       |       |       |       |       |       |
| cassava4.1_003719m.g | signalling.light |  | Phototropic-responsive NPH3 family protein  | 0.17  | -0.19 | 0.36  | 1.33  | 0.27  | 2.16  | -0.61 | 0.68  | 0.59  | 2.44  |
| cassava4.1_025564m.g | signalling.light |  | Phototropic-responsive NPH3 family protein  | -0.02 | -1.07 | 0.42  | -0.29 | -0.10 | -0.61 | -1.04 | -0.67 | -0.38 | -0.95 |
| cassava4.1_005067m.g | signalling.light |  | Phototropic-responsive NPH3 family protein  | -0.22 | -1.03 | 0.32  | 0.41  | 0.41  | 0.82  | -0.38 | 0.84  | 0.08  | 1.19  |
| cassava4.1_004452m.g | signalling.light |  | Phototropic-responsive NPH3 family protein  | -0.65 | -1.83 | -0.37 | -1.08 | -0.12 | -1.19 | -0.46 | -1.78 | -0.49 | -1.74 |
| cassava4.1_000918m.g | signalling.light |  | SPA (suppressor of phyA-105) protein family | -1.29 | -3.25 | -0.44 | -2.06 | -0.11 | -2.54 | -0.43 | -3.24 | -0.30 | -2.80 |
| cassava4.1_033918m.g | signalling.light |  | SPA1-related 3                              | -0.76 | -2.26 | -0.40 | -1.87 | -0.07 | -2.19 | 0.14  | -2.55 | -0.16 | -1.88 |
| cassava4.1_001319m.g | signalling.light |  | SPA1-related 3                              | -0.37 | -0.99 | -0.16 | -0.28 | -0.04 | -0.97 | 0.03  | -1.69 | -0.24 | -1.22 |
| cassava4.1_017713m.g | signalling.light |  | CCR-like                                    | -0.22 | -2.80 | -0.02 | -5.12 | 0.08  | -5.10 | -0.04 | -2.66 | -0.28 | -3.40 |

**Supplemental Table S8. Genes annotated to redox pathway. The extent of differential expression is measured in terms of log<sub>2</sub> fold change of treatment vs. control.**

| Cassava ID           | Mapman Category                           | Short Description                | PG0     | FG0   | PG2   | FG2   | PG4    | FG4   | PG0   | FG0   | PG2   | FG2   |
|----------------------|-------------------------------------------|----------------------------------|---------|-------|-------|-------|--------|-------|-------|-------|-------|-------|
|                      |                                           |                                  | 120 day |       |       |       | 45 day |       |       |       |       |       |
| cassava4.1_024509m.g | redox.ascorbate and glutathione.ascorbate | ascorbate peroxidase 2           | -5.35   | -6.59 | -4.49 | -7.32 | -0.90  | -2.93 | 1.30  | -0.30 | -0.07 | -1.95 |
| cassava4.1_027646m.g | redox.ascorbate and glutathione.ascorbate | ascorbate peroxidase 4           | -1.36   | -2.69 | -0.52 | -3.09 | -0.10  | -4.20 | -0.48 | -2.85 | -0.61 | -2.03 |
| cassava4.1_006367m.g | redox.ascorbate and glutathione.ascorbate | monodehydroascorbate reductase 6 | -1.22   | -1.63 | -0.41 | -0.87 | -0.10  | -0.83 | -0.18 | -1.95 | -0.37 | -1.44 |

|                      |                                             |                                  |       |       |       |       |       |       |       |       |       |       |
|----------------------|---------------------------------------------|----------------------------------|-------|-------|-------|-------|-------|-------|-------|-------|-------|-------|
| cassava4.1_022665m.g | redox.ascorbate and glutathione.ascorbate   | ascorbate peroxidase 4           | -1.16 | -2.91 | -0.18 | -2.38 | -0.01 | -3.35 | -0.78 | -3.22 | -0.72 | -2.18 |
| cassava4.1_016900m.g | redox.ascorbate and glutathione.ascorbate   | thylakoidal ascorbate peroxidase | -1.04 | -2.89 | -0.74 | -2.35 | 0.03  | -2.11 | -0.46 | -2.44 | -0.73 | -2.45 |
| cassava4.1_015741m.g | redox.ascorbate and glutathione.ascorbate   | stromal ascorbate peroxidase     | -0.88 | -2.68 | -0.45 | -2.35 | -0.10 | -2.17 | -0.49 | -2.77 | -0.86 | -2.66 |
| cassava4.1_005802m.g | redox.ascorbate and glutathione.ascorbate   | monodehydroascorbate reductase 4 | -0.54 | -1.66 | -0.33 | -1.38 | 0.07  | -1.15 | -0.15 | -1.69 | -0.41 | -1.80 |
| cassava4.1_013773m.g | redox.ascorbate and glutathione.ascorbate   | dehydroascorbate reductase 1     | -0.41 | -1.13 | -0.25 | -1.02 | -0.06 | -0.84 | -0.47 | -1.07 | -0.54 | -1.34 |
| cassava4.1_013184m.g | redox.ascorbate and glutathione.ascorbate   | ascorbate peroxidase 3           | -0.33 | -0.68 | -0.24 | -0.52 | 0.01  | -0.74 | -0.21 | -1.13 | -0.47 | -1.18 |
| cassava4.1_016102m.g | redox.ascorbate and glutathione.ascorbate   | dehydroascorbate reductase 2     | -0.13 | -0.29 | -0.27 | -0.96 | 0.05  | -0.36 | 0.03  | -0.15 | -0.66 | -1.04 |
| cassava4.1_013461m.g | redox.ascorbate and glutathione.ascorbate   | ascorbate peroxidase 1           | 0.95  | 0.72  | 0.59  | 0.96  | 0.18  | 1.28  | -0.06 | 0.69  | 0.00  | 0.84  |
| cassava4.1_014423m.g | redox.ascorbate and glutathione.ascorbate   | ascorbate peroxidase 1           | 0.61  | 0.15  | 0.32  | 0.13  | 0.04  | 1.26  | 0.87  | 0.23  | -0.14 | -0.03 |
| cassava4.1_009867m.g | redox.ascorbate and glutathione.ascorbate   | stromal ascorbate peroxidase     | 1.59  | 1.68  | 0.86  | 1.55  | 0.10  | 1.59  | -0.18 | 1.55  | 0.46  | 1.94  |
| cassava4.1_006694m.g | redox.ascorbate and glutathione.ascorbate   | monodehydroascorbate reductase 1 | 0.73  | 1.12  | 0.70  | 1.13  | 0.08  | 0.70  | -0.14 | 1.53  | 0.11  | 0.97  |
| cassava4.1_029735m.g | redox.ascorbate and glutathione.glutathione | glutamate-cysteine ligase        | -0.93 | -1.50 | -0.67 | -0.52 | -0.67 | -2.36 | -0.58 | -2.78 | -0.08 | -1.17 |
| cassava4.1_006560m.g | redox.ascorbate and glutathione.glutathione | glutathione synthetase 2         | -0.78 | -0.59 | -0.70 | -0.69 | 0.12  | -0.21 | -0.45 | -2.31 | -0.39 | -1.18 |
| cassava4.1_015084m.g | redox.ascorbate and glutathione.glutathione | glutathione peroxidase 1         | -0.10 | -0.95 | -0.25 | -1.60 | 0.04  | -1.86 | 0.58  | -1.05 | -0.17 | -1.41 |

|                      |                                             |                                                                 |       |       |       |       |       |       |       |       |       |       |
|----------------------|---------------------------------------------|-----------------------------------------------------------------|-------|-------|-------|-------|-------|-------|-------|-------|-------|-------|
| cassava4.1_012839m.g | redox.ascorbate and glutathione.glutathione | glutathione-disulfide reductase                                 | 0.08  | 0.54  | -0.06 | 0.22  | -0.08 | 0.59  | -0.05 | 1.07  | 0.62  | 0.94  |
| cassava4.1_017755m.g | redox.ascorbate and glutathione.glutathione | glutathione peroxidase 6                                        | 1.14  | 1.53  | 0.50  | 0.49  | 0.22  | 1.14  | 0.55  | 1.50  | -0.12 | 0.43  |
| cassava4.1_030777m.g | redox.dismutases and catalases              | catalase 2                                                      | -0.56 | -2.94 | -0.09 | -1.99 | -0.15 | -2.45 | 0.02  | -1.67 | -0.74 | -3.05 |
| cassava4.1_018294m.g | redox.dismutases and catalases              | copper/zinc superoxide dismutase 1                              | 0.61  | 0.50  | 0.04  | 0.00  | 0.02  | -0.20 | 0.96  | 0.36  | 0.34  | 0.19  |
| cassava4.1_018049m.g | redox.dismutases and catalases              | copper/zinc superoxide dismutase 3                              | -0.68 | -1.32 | -0.55 | -0.96 | 0.14  | -0.52 | -0.11 | -0.52 | -0.43 | -0.67 |
| cassava4.1_006297m.g | redox.dismutases and catalases              | catalase 2                                                      | -0.39 | -2.44 | -0.40 | -2.08 | -0.04 | -1.87 | -0.16 | -1.66 | -0.82 | -2.61 |
| cassava4.1_024232m.g | redox.glutaredoxins                         | Thioredoxin superfamily protein                                 | -1.19 | -2.99 | 0.03  | -3.20 | -0.97 | -2.34 | -0.15 | -5.26 | -1.16 | -2.78 |
| cassava4.1_008955m.g | redox.glutaredoxins                         | Glutaredoxin family protein                                     | -0.82 | -1.35 | -0.13 | -0.70 | -0.33 | -0.62 | -0.43 | -1.35 | -0.43 | -0.70 |
| cassava4.1_033785m.g | redox.glutaredoxins                         | Thioredoxin superfamily protein                                 | -0.69 | -0.30 | -0.37 | 0.27  | -0.54 | -0.59 | 1.40  | -0.86 | -0.59 | 0.06  |
| cassava4.1_014034m.g | redox.glutaredoxins                         | Glutaredoxin family protein                                     | -0.62 | -0.85 | -0.55 | -0.88 | -0.07 | -0.16 | 0.03  | -0.66 | -0.16 | -0.57 |
| cassava4.1_034311m.g | redox.glutaredoxins                         | Glutaredoxin family protein                                     | -0.62 | -2.36 | -0.29 | -1.46 | 0.02  | -0.67 | -0.07 | -1.32 | -0.49 | -1.80 |
| cassava4.1_024311m.g | redox.glutaredoxins                         | Glutaredoxin family protein                                     | -0.51 | -1.64 | -0.51 | -0.74 | 0.07  | -0.44 | -0.48 | -1.33 | 0.01  | 0.00  |
| cassava4.1_018918m.g | redox.glutaredoxins                         | Thioredoxin superfamily protein                                 | -0.43 | -0.96 | -1.38 | -1.65 | -0.02 | -1.11 | -1.14 | -2.36 | -0.61 | -2.08 |
| cassava4.1_019956m.g | redox.glutaredoxins                         | Thioredoxin superfamily protein                                 | -0.11 | -1.65 | -0.50 | -1.87 | 0.04  | -1.84 | -0.33 | -1.08 | -0.46 | -1.58 |
| cassava4.1_019954m.g | redox.glutaredoxins                         | Thioredoxin superfamily protein                                 | 0.59  | 0.35  | -0.26 | -1.05 | 0.00  | -1.60 | -0.38 | -0.84 | -1.02 | -2.56 |
| cassava4.1_002749m.g | redox.glutaredoxins                         | glutaredoxin-related                                            | 0.01  | 1.09  | 0.23  | 0.99  | 0.13  | 0.58  | -0.23 | -0.01 | -0.53 | -0.64 |
| cassava4.1_018797m.g | redox.glutaredoxins                         | Glutaredoxin family protein                                     | 0.03  | -0.06 | 0.39  | 0.77  | -0.06 | 1.04  | -0.26 | -0.02 | -0.25 | 0.44  |
| cassava4.1_019777m.g | redox.glutaredoxins                         | Glutaredoxin family protein                                     | 0.58  | 1.35  | 0.58  | 0.68  | 0.18  | 0.19  | 0.18  | 1.36  | -0.01 | 0.84  |
| cassava4.1_018177m.g | redox.glutaredoxins                         | Thioredoxin superfamily protein                                 | 1.07  | -0.59 | 1.52  | 1.73  | 0.36  | 0.47  | -0.85 | 0.17  | 0.79  | -0.26 |
| cassava4.1_016021m.g | redox.peroxiredoxin                         | Thioredoxin superfamily protein                                 | -1.44 | -2.73 | -0.72 | -2.58 | -0.23 | -2.89 | -1.03 | -2.49 | -1.05 | -2.52 |
| cassava4.1_016588m.g | redox.peroxiredoxin                         | peroxiredoxin IIF                                               | -0.08 | -0.12 | -0.14 | 0.04  | 0.07  | 1.03  | 0.11  | 1.12  | -0.18 | 0.91  |
| cassava4.1_015438m.g | redox.peroxiredoxin                         | Thioredoxin superfamily protein                                 | -0.98 | -2.91 | -0.38 | -1.40 | -0.04 | -0.69 | -0.74 | -1.94 | -0.98 | -1.98 |
| cassava4.1_013279m.g | redox.thioredoxin                           | atypical CYS HIS rich thioredoxin 4                             | -1.27 | -2.10 | -0.69 | -2.64 | -0.30 | -3.70 | -0.03 | -4.18 | -0.67 | -3.58 |
| cassava4.1_005499m.g | redox.thioredoxin                           | NADPH-dependent thioredoxin reductase C                         | -0.98 | -1.69 | -0.24 | -1.13 | -0.10 | -1.05 | -0.61 | -2.13 | -0.45 | -1.51 |
| cassava4.1_027763m.g | redox.thioredoxin                           | ferredoxin/thioredoxin reductase subunit A (variable subunit) 2 | -0.93 | -2.14 | -1.24 | -3.01 | 0.22  | -1.31 | -0.04 | -2.04 | -0.80 | -2.16 |

|                      |                                 |                                                                         |       |       |       |       |       |       |       |       |       |       |
|----------------------|---------------------------------|-------------------------------------------------------------------------|-------|-------|-------|-------|-------|-------|-------|-------|-------|-------|
| cassava4.1_017096m.g | redox.thioredoxin               | Thioredoxin superfamily protein                                         | -0.92 | -3.73 | -0.64 | -4.13 | -0.01 | -4.36 | -0.11 | -2.53 | -0.98 | -3.80 |
| cassava4.1_015744m.g | redox.thioredoxin               | ferredoxin/thioredoxin reductase subunit A<br>(variable subunit) 2      | -0.69 | -1.82 | -0.60 | -1.49 | -0.10 | -1.03 | -0.17 | -1.53 | -0.53 | -1.19 |
| cassava4.1_021142m.g | redox.thioredoxin               | ferredoxin thioredoxin reductase catalytic beta<br>chain family protein | -0.67 | -1.89 | -0.18 | -1.98 | 0.10  | -1.70 | -0.36 | -1.49 | -0.93 | -2.37 |
| cassava4.1_018403m.g | redox.thioredoxin               | ferredoxin thioredoxin reductase catalytic beta<br>chain family protein | -0.63 | -1.37 | -0.41 | -1.25 | -0.06 | -0.69 | -0.43 | -1.10 | -0.51 | -0.95 |
| cassava4.1_015817m.g | redox.thioredoxin               | Thioredoxin superfamily protein                                         | -0.62 | -2.30 | -0.56 | -1.61 | -0.17 | -1.09 | -0.28 | -1.79 | -0.60 | -1.49 |
| cassava4.1_012905m.g | redox.thioredoxin               | atypical CYS HIS rich thioredoxin 4                                     | -0.56 | -1.55 | -0.37 | -2.49 | -0.14 | -2.88 | 0.38  | -2.78 | -0.73 | -3.14 |
| cassava4.1_017711m.g | redox.thioredoxin               | Rubredoxin-like superfamily protein                                     | -0.49 | -1.69 | -0.31 | -1.04 | -0.03 | -0.80 | -0.22 | -0.71 | -0.42 | -0.95 |
| cassava4.1_011786m.g | redox.thioredoxin               | APR-like 4                                                              | -0.48 | -1.04 | 0.18  | 0.11  | 0.15  | 0.07  | -0.29 | -0.57 | -0.53 | -0.78 |
| cassava4.1_016798m.g | redox.thioredoxin               | WCRKC thioredoxin 1                                                     | -0.46 | -1.05 | -0.30 | -2.42 | 0.06  | -2.89 | 0.01  | -1.13 | -0.43 | -1.90 |
| cassava4.1_012801m.g | redox.thioredoxin               | chloroplastic drought-induced stress protein of 32<br>kD                | -0.42 | -2.36 | -0.27 | -2.49 | 0.13  | -1.85 | -0.57 | -1.02 | -0.76 | -1.95 |
| cassava4.1_017734m.g | redox.thioredoxin               | thioredoxin Y2                                                          | -0.33 | -0.32 | -0.31 | -0.74 | 0.08  | -0.88 | -0.43 | -0.84 | -0.77 | -1.44 |
| cassava4.1_015481m.g | redox.thioredoxin               | atypical CYS HIS rich thioredoxin 2                                     | -0.32 | -0.86 | -0.32 | -0.60 | -0.10 | -0.42 | -0.21 | -0.06 | -0.32 | -0.30 |
| cassava4.1_016825m.g | redox.thioredoxin               | thioredoxin F2                                                          | -0.23 | -1.12 | -0.13 | -1.26 | 0.02  | -1.36 | -0.31 | -1.31 | -0.61 | -1.82 |
| cassava4.1_008355m.g | redox.thioredoxin               | PDI-like 1-1                                                            | 0.07  | 0.32  | 0.80  | 1.01  | 0.01  | 0.85  | -0.25 | 0.58  | 0.13  | 1.33  |
| cassava4.1_006109m.g | redox.thioredoxin               | PDI-like 1-1                                                            | 0.18  | 0.49  | 0.64  | 1.24  | 0.40  | 1.27  | 0.65  | 1.76  | 0.85  | 2.54  |
| cassava4.1_019244m.g | redox.thioredoxin               | C-terminal cysteine residue is changed to a serine 1                    | 0.23  | -0.34 | -0.69 | -1.66 | -0.19 | -1.74 | 0.15  | 0.21  | -0.56 | -0.85 |
| cassava4.1_007986m.g | redox.thioredoxin               | PDI-like 2-2                                                            | 0.30  | 0.54  | 0.62  | 1.01  | -0.10 | 1.06  | -0.51 | 0.39  | 0.31  | 1.58  |
| cassava4.1_016073m.g | redox.thioredoxin               | thioredoxin domain-containing protein 9 homolog                         | 0.39  | 0.97  | 0.45  | 0.83  | -0.07 | -0.09 | -0.60 | 1.29  | 0.06  | 0.83  |
| cassava4.1_015299m.g | redox.thioredoxin               | atypical CYS HIS rich thioredoxin 2                                     | 0.46  | -0.66 | 0.63  | 0.51  | -0.01 | 0.48  | 0.24  | 1.15  | -0.20 | 0.82  |
| cassava4.1_010463m.g | redox.thioredoxin               | thioredoxin family protein                                              | 0.51  | 1.22  | 1.43  | 1.78  | -0.11 | 1.57  | -0.30 | 1.09  | 0.75  | 2.78  |
| cassava4.1_018507m.g | redox.thioredoxin               | thioredoxin H-type 1                                                    | 0.97  | 1.28  | 0.35  | 0.77  | 0.11  | 0.95  | 0.74  | 1.30  | -0.85 | -0.09 |
| cassava4.1_017131m.g | redox.thioredoxin               | thioredoxin M-type 4                                                    | 1.05  | 1.27  | 0.23  | 0.14  | 0.11  | 0.30  | 0.20  | 0.55  | -0.11 | 0.29  |
| cassava4.1_018594m.g | redox.thioredoxin               | thioredoxin H-type 7                                                    | 1.05  | 1.83  | 2.31  | 3.90  | -0.03 | 3.12  | -2.60 | 2.04  | 0.43  | 3.38  |
| cassava4.1_016044m.g | misc.glutathione S transferases | glutathione S-transferase F11                                           | -6.30 | -2.95 | -1.90 | -5.44 | -0.70 | -3.41 | -3.37 | -4.08 | -1.25 | -4.67 |

|                      |                                 |                                                |       |       |       |       |       |       |       |       |       |       |
|----------------------|---------------------------------|------------------------------------------------|-------|-------|-------|-------|-------|-------|-------|-------|-------|-------|
| cassava4.1_015784m.g | misc.glutathione S transferases | glutathione S-transferase TAU 25               | -1.37 | -4.34 | -0.92 | -5.09 | 0.01  | -4.70 | -0.37 | -2.78 | -0.82 | -3.50 |
| cassava4.1_014463m.g | misc.glutathione S transferases | glutathione S-transferase F11                  | -1.09 | -2.73 | -1.11 | -2.87 | -0.10 | -1.62 | -1.16 | -1.59 | -0.60 | -1.72 |
| cassava4.1_012409m.g | misc.glutathione S transferases | Glutathione S-transferase family protein       | -0.69 | -1.22 | -0.09 | -0.88 | -0.16 | -1.09 | -0.72 | -1.60 | -0.86 | -1.42 |
| cassava4.1_015854m.g | misc.glutathione S transferases | glutathione S-transferase TAU 19               | -0.66 | -1.50 | -1.58 | -2.29 | -0.49 | 0.04  | 0.37  | 1.00  | 0.11  | 0.84  |
| cassava4.1_015612m.g | misc.glutathione S transferases | glutathione S-transferase tau 7                | -0.46 | -2.78 | -0.04 | -2.85 | 0.17  | -2.70 | -0.86 | -2.27 | -0.60 | -2.63 |
| cassava4.1_014626m.g | misc.glutathione S transferases | glutathione S-transferase THETA 2              | -0.43 | -0.49 | -0.23 | -0.49 | 0.00  | -0.93 | 0.08  | -0.04 | 0.00  | -0.33 |
| cassava4.1_015872m.g | misc.glutathione S transferases | glutathione S-transferase TAU 19               | -0.23 | -1.57 | -0.14 | -0.95 | -0.07 | -0.40 | -0.29 | -0.66 | -0.72 | -1.37 |
| cassava4.1_015406m.g | misc.glutathione S transferases | Glutathione S-transferase family protein       | -0.11 | 0.68  | -0.12 | 0.38  | -0.21 | 2.00  | -0.06 | 1.38  | 0.64  | 2.35  |
| cassava4.1_018515m.g | misc.glutathione S transferases | microsomal glutathione s-transferase, putative | -0.08 | 0.19  | -0.59 | -0.62 | 0.16  | 0.39  | 0.05  | 1.35  | 0.09  | 0.74  |
| cassava4.1_015709m.g | misc.glutathione S transferases | glutathione S-transferase tau 7                | 0.13  | -0.60 | 0.17  | -0.62 | -0.18 | -0.97 | 0.29  | -1.07 | -0.44 | -1.61 |
| cassava4.1_008745m.g | misc.glutathione S transferases | Glutathione S-transferase family protein       | 0.81  | 1.09  | 0.07  | 0.20  | -0.05 | 0.14  | -0.17 | 1.21  | 0.40  | 0.79  |
| cassava4.1_015861m.g | misc.glutathione S transferases | glutathione S-transferase TAU 8                | 1.00  | 1.69  | 1.13  | 1.53  | -0.04 | 0.50  | 1.29  | 1.23  | -2.08 | -0.47 |
| cassava4.1_015761m.g | misc.glutathione S transferases | glutathione S-transferase TAU 25               | 1.85  | 0.12  | 0.73  | 0.16  | 0.24  | -0.54 | 0.90  | 0.03  | -1.26 | -2.41 |
| cassava4.1_016175m.g | misc.glutathione S transferases | glutathione S-transferase PHI 9                | 0.83  | 1.16  | 0.70  | 1.10  | 0.16  | 1.81  | 0.84  | 2.28  | 0.49  | 1.97  |
| cassava4.1_007092m.g | misc.glutathione S transferases | glutathione S-transferase tau 7                | 1.32  | 2.15  | 0.30  | 0.09  | -0.68 | 1.25  | 0.02  | 1.89  | 0.96  | 2.51  |
